# Supplementary material for: Exploring the Pharmacological Mechanism of the Herb Pair “HuangLian-GanJiang” against Colorectal Cancer Based on Network Pharmacology
Source: Evid Based Complement Alternat Med. 2019 Nov 29;2019:2735050. doi: 10.1155/2019/2735050 (PMC6906823; doi:10.1155/2019/2735050)
Supplement: Supplementary Materials — Table S1: chemical compounds of HL-GJ from TCMSP. Table S2: chemical compounds of HL-GJ from TCMID. Table S3: compounds in HL-GJ and corresponding targets. Table S4: CRC targets. Table S5: topological parameters for PPI Network. Table S6: topological parameters for compound nodes. Table S7: Gene Ontology (BP) biological process analysis. Table S8: Gene Ontology (MF) molecular function analysis. Table S9: pathway analysis. [file 2735050.f1.zip]

Archive with 9 entries (9 files):
- 2735050.f1/Table S1.xlsx
- 2735050.f1/Table S2.xlsx
- 2735050.f1/Table S3.xlsx
- 2735050.f1/Table S4.xlsx
- 2735050.f1/Table S5.xlsx
- 2735050.f1/Table S6.xlsx
- 2735050.f1/Table S7.xlsx
- 2735050.f1/Table S8.xlsx
- 2735050.f1/Table S9.xlsx
