# Supplementary material for: Exploring the Pharmacological Mechanism of the Herb Pair “HuangLian-GanJiang” against Colorectal Cancer Based on Network Pharmacology
Source: Evid Based Complement Alternat Med. 2019 Nov 29;2019:2735050. doi: 10.1155/2019/2735050 (PMC6906823; doi:10.1155/2019/2735050)
Supplement: Supplementary Materials — Table S1: chemical compounds of HL-GJ from TCMSP. Table S2: chemical compounds of HL-GJ from TCMID. Table S3: compounds in HL-GJ and corresponding targets. Table S4: CRC targets. Table S5: topological parameters for PPI Network. Table S6: topological parameters for compound nodes. Table S7: Gene Ontology (BP) biological process analysis. Table S8: Gene Ontology (MF) molecular function analysis. Table S9: pathway analysis. [file 2735050.f1.zip › 2735050.f1/Table S1.xlsx]

## Sheet: Sheet1
Table S1 Chemical Compounds of HL-GJ from TCMSP
Herb	Compound	Database	OB(％)	DL	Pubchem ID
HL	berberrubine	TCMSP	35.74	0.73
HL	(R)-Canadine	TCMSP	55.37	0.77
HL	Berlambine	TCMSP	36.68	0.82
HL	Corchoroside A_qt	TCMSP	104.95	0.78
HL	quercetin	TCMSP	46.43	0.28
HL	Moupinamide	TCMSP	86.71	0.26
HL	obacunone	TCMSP	43.29	0.77
HL	berberine	TCMSP	36.86	0.78
HL	epiberberine	TCMSP	43.09	0.78	160876
HL	magnograndiolide	TCMSP	63.71	0.19	5319198
HL	palmidin a	TCMSP	35.36	0.65
HL	palmatine	TCMSP	64.6	0.65
HL	coptisine	TCMSP	30.67	0.86
HL	worenine	TCMSP	45.83	0.87
GJ	[(1S)-3-[(E)-but-2-enyl]-2-methyl-4-oxo-1-cyclopent-2-enyl] (1R,3R)-3-[(E)-3-methoxy-2-methyl-3-oxoprop-1-enyl]-2,2-dimethylcyclopropane-1-carboxylate	TCMSP	62.52	0.31	5315890
GJ	beta-sitosterol	TCMSP	36.91	0.75
GJ	sitosterol	TCMSP	36.91	0.75
GJ	sexangularetin	TCMSP	62.86	0.3
