# Supplementary material for: Exploring the Pharmacological Mechanism of the Herb Pair “HuangLian-GanJiang” against Colorectal Cancer Based on Network Pharmacology
Source: Evid Based Complement Alternat Med. 2019 Nov 29;2019:2735050. doi: 10.1155/2019/2735050 (PMC6906823; doi:10.1155/2019/2735050)
Supplement: Supplementary Materials — Table S1: chemical compounds of HL-GJ from TCMSP. Table S2: chemical compounds of HL-GJ from TCMID. Table S3: compounds in HL-GJ and corresponding targets. Table S4: CRC targets. Table S5: topological parameters for PPI Network. Table S6: topological parameters for compound nodes. Table S7: Gene Ontology (BP) biological process analysis. Table S8: Gene Ontology (MF) molecular function analysis. Table S9: pathway analysis. [file 2735050.f1.zip › 2735050.f1/Table S2.xlsx]

## Sheet: Sheet1
Table S2 Chemical Compounds of HL-GJ from TCMID
Herb	Compound	Database	Pubchem ID
HL	2,3,4-trihydroxy-benzenepropanoicacid	TCMID	5322049
HL	3,4-dihydroxyphenylethyl alcohol glucoside	TCMID	6915839
HL	3-carboxy-4-hydroxy-phenoxy glucoside	TCMID	10914066
HL	5,8-dihydroxy-2-(2-phenylethyl)chromone	TCMID	129670
HL	chlorogenic acid	TCMID	53399195
HL	columbianadin	TCMID	53399217
HL	ferulicacid	TCMID
HL	jatrorrhizine	TCMID
HL	obaculactone	TCMID
HL	ferulic acid	TCMID	54691413
GJ	(e)-8β,17-epoxylabd-12-ene-15,16-dial	TCMID	21668974
GJ	(e)-citral	TCMID
GJ	(e, e)-α-farnesene	TCMID
GJ	(z)-citral	TCMID
GJ	10-gingerol	TCMID
GJ	2-heptanol	TCMID
GJ	2-nonanol	TCMID
GJ	3,5-diacetoxy-1-(4-hydroxy-3,5-dimethoxy-phenyl)-7-(4-hydroxy-3-methoxyphenyl)heptane	TCMID	5316611
GJ	5 ξ-hydroxy-1-(4-hydroxy-3,5-dimethoxy-phenyl)-7-(4-hydroxy-3-methoxyphenyl)-3-heptanone	TCMID	21770240
GJ	8-gingerol	TCMID
GJ	alpha-limonene	TCMID
GJ	beta-farnesene	TCMID	5281517
GJ	beta-phellandrene	TCMID	443161
GJ	bisabolene	TCMID
GJ	cineole	TCMID
GJ	cinerins	TCMID
GJ	d-limonene	TCMID	440917
GJ	decane	TCMID
GJ	geranyl acetate	TCMID	24832062
GJ	gingerenone c	TCMID	5317593
GJ	gingerol	TCMID
GJ	ginketin	TCMID
GJ	isogingerenone b	TCMID	5318568
GJ	linalool	TCMID
GJ	methyl hexadecanate	TCMID	8181
GJ	nonaldehyde	TCMID
GJ	p-cymene	TCMID
GJ	zingiberol	TCMID
GJ	zingiberone	TCMID
GJ	[10]-gingerdione	TCMID
GJ	[10]-gingerol	TCMID
GJ	[8]-gingerol	TCMID
GJ	α-curcumene	TCMID
GJ	α-phellandrene	TCMID
GJ	β-bisabolene	TCMID
GJ	camphene	TCMID
GJ	nereistoxin	TCMID
