# Supplementary material for: Exploring the Pharmacological Mechanism of the Herb Pair “HuangLian-GanJiang” against Colorectal Cancer Based on Network Pharmacology
Source: Evid Based Complement Alternat Med. 2019 Nov 29;2019:2735050. doi: 10.1155/2019/2735050 (PMC6906823; doi:10.1155/2019/2735050)
Supplement: Supplementary Materials — Table S1: chemical compounds of HL-GJ from TCMSP. Table S2: chemical compounds of HL-GJ from TCMID. Table S3: compounds in HL-GJ and corresponding targets. Table S4: CRC targets. Table S5: topological parameters for PPI Network. Table S6: topological parameters for compound nodes. Table S7: Gene Ontology (BP) biological process analysis. Table S8: Gene Ontology (MF) molecular function analysis. Table S9: pathway analysis. [file 2735050.f1.zip › 2735050.f1/Table S3.xlsx]

## Sheet: Sheet1
Table S3 Compounds in HL-GJ and corresponding targets
Molecule Name	Protein name	Uniprot	Gene
2,3,4-trihydroxy-benzenepropanoicacid	Probable ATP-dependent RNA helicase DDX6	P26196	DDX6
	Epidermal growth factor receptor	P00533	EGFR
	Seprase	Q12884	FAP
	Carbonic anhydrase 1	P00915	CA1
	Serine/threonine-protein kinase 6	O14965	AURKA
	Cholinesterase	P06276	BCHE
	Urokinase-type plasminogen activator	P00749	PLAU
	Cathepsin D	P07339	CTSD
	Glutathione S-transferase P	P09211	GSTP1
	Peptidyl-prolyl cis-trans isomerase A	P62937	PPIA
	Carbonic anhydrase 2	P00918	CA2
	Glucosylceramidase	P04062	GBA
	Purine nucleoside phosphorylase	P00491	PNP
	TGF-beta receptor type-2	P37173	TGFBR2
3,4-dihydroxyphenylethyl alcohol glucoside	Tyrosine-protein kinase HCK	P08631	HCK
	Cathepsin D	P07339	CTSD
	Glutathione S-transferase P	P09211	GSTP1
	Eosinophil lysophospholipase	Q05315	CLC
	Carbonic anhydrase 2	P00918	CA2
	S-methyl-5-thioadenosine phosphorylase	Q13126	MTAP
	Oxysterols receptor LXR-beta	P55055	NR1H2
	Peptidyl-prolyl cis-trans isomerase FKBP1A	P62942	FKBP1A
	Glucosylceramidase	P04062	GBA
	Cyclin-A2	P20248	CCNA2
	Chymase	P23946	CMA1
	Cholinesterase	P06276	BCHE
	Cell division protein kinase 2	P24941	CDK2
	TGF-beta receptor type-2	P37173	TGFBR2
	Purine nucleoside phosphorylase	P00491	PNP
	Estrogen receptor beta	Q92731	ESR2
	Carbonic anhydrase 1	P00915	CA1
	Ephrin type-B receptor 4	P54760	EPHB4
	Epidermal growth factor receptor	P00533	EGFR
	Serine/threonine-protein kinase Chk1	O14757	CHEK1
	Probable ATP-dependent RNA helicase DDX6	P26196	DDX6
	cAMP-specific 3,5-cyclic phosphodiesterase 4B	Q07343	PDE4B
	Seprase	Q12884	FAP
	Proto-oncogene serine/threonine-protein kinase Pim-1	P11309	PIM1
	Heat shock protein HSP 90-alpha	P07900	HSP90AA1
	Progesterone receptor	P06401	PGR
	Cathepsin L2	O60911	CTSV
	Heat shock cognate 71 kDa protein	P11142	HSPA8
	Estrogen receptor	P03372	ESR1
	Peptidyl-prolyl cis-trans isomerase A	P62937	PPIA
	Serine/threonine-protein kinase 6	O14965	AURKA
	Urokinase-type plasminogen activator	P00749	PLAU
3-carboxy-4-hydroxy-phenoxy glucoside	ADP-ribose pyrophosphatase, mitochondrial	Q9BW91	NUDT9
	Alpha-amylase 1	P04745	AMY1A
	Methionine aminopeptidase 1	P53582	METAP1
	Serine/threonine-protein kinase Chk1	O14757	CHEK1
	Carbonic anhydrase 2	P00918	CA2
	Serine/threonine-protein kinase 6	O14965	AURKA
	TGF-beta receptor type-2	P37173	TGFBR2
	Glutathione S-transferase P	P09211	GSTP1
	Carbonic anhydrase 1	O43570	CA12
	Epidermal growth factor receptor	P00533	EGFR
	Coagulation factor X	P00742	F10
	Glucosylceramidase	P04062	GBA
	Cathepsin D	P07339	CTSD
	Progesterone receptor	P06401	PGR
	S-methyl-5-thioadenosine phosphorylase	Q13126	MTAP
	Cholinesterase	P06276	BCHE
	SPARC	P09486	SPARC
	Calmodulin	P62158	CALM
	Cathepsin S	P25774	CTSS
	Cyclin-A2	P20248	CCNA2
	Angiogenin	P03950	ANG
	Purine nucleoside phosphorylase	P00491	PNP
	Cyclin-dependent kinase 5 activator 1	Q15078	CDK5R1
	Inositol monophosphatase	P29218	IMPA1
	U1 small nuclear ribonucleoprotein A	P09012	SNRPA
	Cathepsin L2	O60911	CTSV
	Probable ATP-dependent RNA helicase DDX6	P26196	DDX6
	Ribonuclease UK114	P52758	RIDA
	Seprase	Q12884	FAP
	Heat shock cognate 71 kDa protein	P11142	HSPA8
	cAMP-specific 3,5-cyclic phosphodiesterase 4B	Q07343	PDE4B
	Intercellular adhesion molecule 2	P13598	ICAM2
5,8-dihydroxy-2-(2-phenylethyl)chromone	Prothrombin	P00734	F2
	Mitogen-activated protein kinase 1	P28482	MAPK1
	Serum albumin	P02768	ALB
	Apolipoprotein A-II	P02652	APOA2
	Steryl-sulfatase	P08842	STS
	Caspase-7	P55210	CASP7
	MAP kinase-activated protein kinase 2	P49137	MAPKAPK2
	Beta-secretase 1	P56817	BACE1
	Carbonic anhydrase 2	P00918	CA2
	Kinesin-like protein KIF11	P52732	KIF11
	Mitogen-activated protein kinase 14	Q16539	MAPK14
	Caspase-3	P42574	CASP3
	Proto-oncogene serine/threonine-protein kinase Pim-1	P11309	PIM1
	Transthyretin	P02766	TTR
	Complement factor B	P00751	CFB
	Androgen receptor	P10275	AR
	Cytochrome P450 19A1	P11511	CYP19A1
	Mitogen-activated protein kinase 10	P53779	MAPK10
	Vascular endothelial growth factor receptor 2	P35968	KDR
	Putative ATP-dependent Clp protease proteolytic subunit, mitochondrial	Q16740	CLPP
	Mitogen-activated protein kinase 8	P45983	MAPK8
	Liver carboxylesterase 1	P23141	CES1
	Amine oxidase [flavin-containing] B	P27338	MAOB
	Cell division protein kinase 2	P24941	CDK2
	Glutathione S-transferase P	P09211	GSTP1
	Estrogen receptor	P03372	ESR1
	Cholinesterase	P06276	BCHE
	Cyclin-A2	P20248	CCNA2
	cGMP-specific 3,5-cyclic phosphodiesterase	O76074	PDE5A
	ADAM 17	P78536	ADAM17
	Estradiol 17-beta-dehydrogenase 11	Q8NBQ5	HSD17B11
	Ephrin type-B receptor 4	P54760	EPHB4
	Serine/threonine-protein kinase Chk1	O14757	CHEK1
	Tyrosine-protein kinase HCK	P08631	HCK
	Heat shock cognate 71 kDa protein	P11142	HSPA8
	Cyclin-dependent kinase 5 activator 1	Q15078	CDK5R1
berberine	Peptidyl-prolyl cis-trans isomerase A	P62937	PPIA
	Carbonic anhydrase 2	P00918	CA2
	Transthyretin	P02766	TTR
	Cholinesterase	P06276	BCHE
	Androgen receptor	P10275	AR
	Cytochrome P450 19A1	P11511	CYP19A1
	Estrogen receptor beta	Q92731	ESR2
chlorogenic acid	Probable ATP-dependent RNA helicase DDX6	P26196	DDX6
	U1 small nuclear ribonucleoprotein A	P09012	SNRPA
	Carbonic anhydrase 12	O43570	CA12
	Heat shock cognate 71 kDa protein	P11142	HSPA8
	Estrogen receptor beta	Q92731	ESR2
	Seprase	Q12884	FAP
	Glucosylceramidase	P04062	GBA
	S-methyl-5-thioadenosine phosphorylase	Q13126	MTAP
	cAMP-specific 3,5-cyclic phosphodiesterase 4B	Q07343	PDE4B
	Estrogen receptor	P03372	ESR1
	Epidermal growth factor receptor	P00533	EGFR
	Tyrosine-protein kinase HCK	P08631	HCK
	ADP-ribose pyrophosphatase, mitochondrial	Q9BW91	NUDT9
	Chymase	P23946	CMA1
	Carbonic anhydrase 1	O43570	CA12
columbianadin	Steryl-sulfatase	P08842	STS
	Apolipoprotein A-II	P02652	APOA2
	Serum albumin	P02768	ALB
	Liver carboxylesterase 1	P23141	CES1
	Cholinesterase	P06276	BCHE
	Transthyretin	P02766	TTR
	MAP kinase-activated protein kinase 2	P49137	MAPKAPK2
	Purine nucleoside phosphorylase	P00491	PNP
	Carbonic anhydrase 2	P00918	CA2
	Estrogen receptor	P03372	ESR1
	Prothrombin	P00734	F2
	Androgen receptor	P10275	AR
	Peptidyl-prolyl cis-trans isomerase A	P62937	PPIA
	Kinesin-like protein KIF11	P52732	KIF11
	Proto-oncogene serine/threonine-protein kinase Pim-1	P11309	PIM1
	Mitogen-activated protein kinase 10	P53779	MAPK10
	Cyclin-A2	P20248	CCNA2
	Amine oxidase [flavin-containing] B	P27338	MAOB
	Cytochrome P450 19A1	P11511	CYP19A1
	Stromelysin-1	P08254	MMP3
	Thyroid hormone receptor beta	P10828	THRB
	Mitogen-activated protein kinase 1	P28482	MAPK1
	Peroxisome proliferator-activated receptor gamma	P37231	PPARG
	Cell division protein kinase 2	P24941	CDK2
	Caspase-3	P42574	CASP3
	Complement factor B	P00751	CFB
	Caspase-7	P55210	CASP7
	Peptidyl-prolyl cis-trans isomerase FKBP1A	P62942	FKBP1A
	Mitogen-activated protein kinase 8	P45983	MAPK8
	Oxysterols receptor LXR-beta	P55055	NR1H2
coptisine	Vanillyl-alcohol oxidase	P56216	VAOA
	Glutathione S-transferase P	P09211	GSTP1
	Ephrin type-B receptor 4	P54760	EPHB4
	Peptidyl-prolyl cis-trans isomerase A	P62937	PPIA
	Carbonic anhydrase 2	P00918	CA2
	Aldo-keto reductase family 1 member C2	P52895	AKR1C2
epiberberine	Transthyretin	P02766	TTR
	Estrogen receptor	P03372	ESR1
	Androgen receptor	P10275	AR
	Carbonic anhydrase 2	P00918	CA2
	Estrogen receptor beta	Q92731	ESR2
	Cytochrome P450 19A1	P11511	CYP19A1
ferulicacid	Proto-oncogene serine/threonine-protein kinase Pim-1	P11309	PIM1
	Serine/threonine-protein kinase 6	O14965	AURKA
	Epidermal growth factor receptor	P00533	EGFR
	Cell division protein kinase 2	P24941	CDK2
jatrorrhizine	Transthyretin	P02766	TTR
	Peptidyl-prolyl cis-trans isomerase A	P62937	PPIA
	Carbonic anhydrase 2	P00918	CA2
	Estrogen receptor	P03372	ESR1
	Glutaminyl-peptide cyclotransferase	Q16769	QPCT
	Estrogen receptor beta	Q92731	ESR2
	Cytochrome P450 19A1	P11511	CYP19A1
	Apolipoprotein A-II	P02652	APOA2
	Steryl-sulfatase	P08842	STS
magnograndiolide	Peptidyl-prolyl cis-trans isomerase A	P62937	PPIA
obaculactone	SEC14-like protein 2	O76054	SEC14L2
	Vitamin D-binding protein	P02774	GC
	Nuclear receptor ROR-alpha	P35398	RORA
	Transthyretin	P02766	TTR
	Mitogen-activated protein kinase 14	Q16539	MAPK14
	Aldo-keto reductase family 1 member C2	P52895	AKR1C2
	Thyroid hormone receptor beta	P10828	THRB
	Bone morphogenetic protein 2	P12643	BMP2
	Steryl-sulfatase	P08842	STS
	Mitogen-activated protein kinase 1	P28482	MAPK1
	Serum albumin	P02768	ALB
	Proto-oncogene serine/threonine-protein kinase Pim-1	P11309	PIM1
	Androgen receptor	P10275	AR
	Carbonic anhydrase 2	P00918	CA2
	Caspase-3	P42574	CASP3
	Estrogen-related receptor gamma	P62508	ESRRG
	Progesterone receptor	P06401	PGR
	Mineralocorticoid receptor	P08235	NR3C2
	B-Raf proto-oncogene serine/threonine-protein kinase	P15056	BRAF
	Sex hormone-binding globulin	P04278	SHBG
	Ribosyldihydronicotinamide dehydrogenase [quinone]	P16083	NQO2
	Liver carboxylesterase 1	P23141	CES1
	TGF-beta receptor type-1	P36897	TGFBR1
	Kinesin-like protein KIF11	P52732	KIF11
	3-phosphoinositide-dependent protein kinase 1	O15530	PDPK1
	Estrogen receptor	P03372	ESR1
	cAMP-specific 3,5-cyclic phosphodiesterase 4D	Q08499	PDE4D
	Estradiol 17-beta-dehydrogenase 1	Q8NBQ5	HSD17B11
	Epidermal growth factor receptor	P00533	EGFR
	Aldose reductase	P15121	AKR1B1
	Glutathione S-transferase P	P09211	GSTP1
	Bile acid receptor	Q96RI1	NR1H4
	Mitogen-activated protein kinase 10	P53779	MAPK10
	ADAM 17	P78536	ADAM17
	Cytochrome P450 19A1	P11511	CYP19A1
	Peptidyl-prolyl cis-trans isomerase A	P62937	PPIA
	cAMP-specific 3,5-cyclic phosphodiesterase 4B	Q07343	PDE4B
	Phosphatidylinositol-4,5-bisphosphate 3-kinase catalytic subunit gamma isoform	P48736	PIK3CG
	Retinoic acid receptor RXR-alpha	P19793	RXRA
	Complement factor D	P00746	CFD
	Bile salt sulfotransferase	Q06520	SULT2A1
	Apolipoprotein A-II	P02652	APOA2
	Mitogen-activated protein kinase 8	P45983	MAPK8
	Prothrombin	P00734	F2
	Wiskott-Aldrich syndrome protein	P42768	WAS
obacunone	Vitamin D-binding protein	P02774	GC
	Bone morphogenetic protein 2	P12643	BMP2
	Mitogen-activated protein kinase 1	P28482	MAPK1
	Steryl-sulfatase	P08842	STS
	Aldo-keto reductase family 1 member C2	P52895	AKR1C2
	Prothrombin	P00734	F2
	Mitogen-activated protein kinase 10	P53779	MAPK10
	Carbonic anhydrase 2	P00918	CA2
	Proto-oncogene serine/threonine-protein kinase Pim-1	P11309	PIM1
	Serum albumin	P02768	ALB
	Transthyretin	P02766	TTR
	Mineralocorticoid receptor	P08235	NR3C2
	Ribosyldihydronicotinamide dehydrogenase [quinone]	P16083	NQO2
	Caspase-3	P42574	CASP3
	Kinesin-like protein KIF11	P52732	KIF11
	Androgen receptor	P10275	AR
	Serine/threonine-protein kinase Chk1	O14757	CHEK1
	Estrogen receptor	P03372	ESR1
	Mitogen-activated protein kinase 8	P45983	MAPK8
	Glutathione S-transferase P	P09211	GSTP1
	Caspase-7	P55210	CASP7
	Peptidyl-prolyl cis-trans isomerase A	P62937	PPIA
	Nuclear receptor ROR-alpha	P35398	RORA
	Progesterone receptor	P06401	PGR
	Complement factor B	P00751	CFB
	3-phosphoinositide-dependent protein kinase 1	O15530	PDPK1
	Phosphatidylinositol-4,5-bisphosphate 3-kinase catalytic subunit gamma isoform	P48736	PIK3CG
palmatine	Transthyretin	P02766	TTR
	Peptidyl-prolyl cis-trans isomerase A	P62937	PPIA
	Androgen receptor	P10275	AR
	Estrogen receptor beta	Q92731	ESR2
	Carbonic anhydrase 2	P00918	CA2
	Cholinesterase	P06276	BCHE
	Estrogen receptor	P03372	ESR1
	Cytochrome P450 19A1	P11511	CYP19A1
palmidin a	Stromelysin-1	P08254	MMP3
	Liver carboxylesterase 1	P23141	CES1
	Transthyretin	P02766	TTR
	Mitogen-activated protein kinase 10	P53779	MAPK10
	Tyrosine-protein kinase HCK	P08631	HCK
	Beta-secretase 1	P56817	BACE1
	Peptidyl-prolyl cis-trans isomerase A	P62937	PPIA
	Peptidyl-prolyl cis-trans isomerase FKBP1A	P62942	FKBP1A
	Aldo-keto reductase family 1 member C2	P52895	AKR1C2
	Steryl-sulfatase	P08842	STS
	Bone morphogenetic protein 2	P12643	BMP2
	Caspase-3	P42574	CASP3
	Mitogen-activated protein kinase 1	P28482	MAPK1
	Collagenase 3	P45452	MMP13
	Glutathione S-transferase P	P09211	GSTP1
	Proto-oncogene serine/threonine-protein kinase Pim-1	P11309	PIM1
	Carbonic anhydrase 1	P00915	CA1
	Glucosylceramidase	P04062	GBA
	Kinesin-like protein KIF11	P52732	KIF11
	Mitogen-activated protein kinase 8	P45983	MAPK8
	P-selectin	P16109	SELP
	Mitogen-activated protein kinase 14	Q16539	MAPK14
	Triggering receptor expressed on myeloid cells 1	Q9NP99	TREM1
	Ribosyldihydronicotinamide dehydrogenase [quinone]	P16083	NQO2
	Cholinesterase	P06276	BCHE
	Carbonic anhydrase 2	P00918	CA2
	Serum albumin	P02768	ALB
	Vascular endothelial growth factor receptor 2	P35968	KDR
	Estradiol 17-beta-dehydrogenase 11	Q8NBQ5	HSD17B11
	MAP kinase-activated protein kinase 2	P49137	MAPKAPK2
	Oxysterols receptor LXR-beta	P55055	NR1H2
	Cathepsin L2	O60911	CTSV
	Apolipoprotein A-II	P02652	APOA2
	Cathepsin D	P07339	CTSD
	Complement factor B	P00751	CFB
	Serine/threonine-protein kinase Chk1	O14757	CHEK1
	Amine oxidase [flavin-containing] B	P27338	MAOB
	Caspase-7	P55210	CASP7
	Androgen receptor	P10275	AR
	S-methyl-5-thioadenosine phosphorylase	Q13126	MTAP
	Serine/threonine-protein kinase 6	O14965	AURKA
	Seprase	Q12884	FAP
	Thyroid hormone receptor beta	P10828	THRB
	Heat shock protein HSP 90-alpha	P07900	HSP90AA1
	Chymase	P23946	CMA1
worenine	Serum albumin	P02768	ALB
	Proto-oncogene serine/threonine-protein kinase Pim-1	P11309	PIM1
	MAP kinase-activated protein kinase 2	P49137	MAPKAPK2
	Carbonic anhydrase 2	P00918	CA2
	Caspase-3	P42574	CASP3
	Estrogen receptor	P03372	ESR1
	Androgen receptor	P10275	AR
	ADAM 17	P78536	ADAM17
	Aldo-keto reductase family 1 member C2	P52895	AKR1C2
	Transthyretin	P02766	TTR
	Glutathione S-transferase P	P09211	GSTP1
	Cytochrome P450 19A1	P11511	CYP19A1
	Bone morphogenetic protein 2	P12643	BMP2
	Estradiol 17-beta-dehydrogenase 1	Q8NBQ5	HSD17B11
	Progesterone receptor	P06401	PGR
berberrubine	Beta-secretase 1	P56817	BACE1
	Peptidyl-prolyl cis-trans isomerase A	P62937	PPIA
	Carbonic anhydrase 2	P00918	CA2
	Transthyretin	P02766	TTR
	Androgen receptor	P10275	AR
	Cholinesterase	P06276	BCHE
	Estrogen receptor	P03372	ESR1
	Cytochrome P450 19A1	P11511	CYP19A1
(R)-Canadine	Carbonic anhydrase 2	P00918	CA2
	Peptidyl-prolyl cis-trans isomerase A	P62937	PPIA
	Transthyretin	P02766	TTR
	Estrogen receptor beta	Q92731	ESR2
	Estrogen receptor	P03372	ESR1
	Apolipoprotein A-II	P02652	APOA2
	Steryl-sulfatase	P08842	STS
	Cholinesterase	P06276	BCHE
Berlambine	Steryl-sulfatase	P08842	STS
	Apolipoprotein A-II	P02652	APOA2
	Carbonic anhydrase 2	P00918	CA2
	Prothrombin	P00734	F2
	Mitogen-activated protein kinase 8	P45983	MAPK8
	Glutathione S-transferase P	P09211	GSTP1
	Mitogen-activated protein kinase 10	P53779	MAPK10
	Cholinesterase	P06276	BCHE
	Complement factor B	P00751	CFB
	Proto-oncogene serine/threonine-protein kinase Pim-1	P11309	PIM1
	Estrogen receptor	P03372	ESR1
	Transthyretin	P02766	TTR
	Serum albumin	P02768	ALB
	Peptidyl-prolyl cis-trans isomerase A	P62937	PPIA
	Estrogen receptor beta	Q92731	ESR2
	Aldo-keto reductase family 1 member C2	P52895	AKR1C2
	Cytochrome P450 19A1	P11511	CYP19A1
	Purine nucleoside phosphorylase	P00491	PNP
Corchoroside A_qt	Stromelysin-1	P08254	MMP3
	Steryl-sulfatase	P08842	STS
	Mitogen-activated protein kinase 1	P28482	MAPK1
	Carbonic anhydrase 2	P00918	CA2
	Triggering receptor expressed on myeloid cells 1	Q9NP99	TREM1
	Proto-oncogene serine/threonine-protein kinase Pim-1	P11309	PIM1
	Apolipoprotein A-II	P02652	APOA2
	Cytochrome P450 19A1	P11511	CYP19A1
	Aldo-keto reductase family 1 member C3	P42330	AKR1C3
	Seprase	Q12884	FAP
	Mitogen-activated protein kinase 10	P53779	MAPK10
	Amine oxidase [flavin-containing] B	P27338	MAOB
	Beta-secretase 1	P56817	BACE1
	Vascular endothelial growth factor receptor 2	P35968	KDR
	Transthyretin	P02766	TTR
	Estradiol 17-beta-dehydrogenase 11	Q8NBQ5	HSD17B11
	Glutathione S-transferase P	P09211	GSTP1
	Cathepsin L2	O60911	CTSV
	Serum albumin	P02768	ALB
	Purine nucleoside phosphorylase	P00491	PNP
	Glucosylceramidase	P04062	GBA
	Mitogen-activated protein kinase 14	Q16539	MAPK14
quercetin	Carbonic anhydrase 2	P00918	CA2
	Prothrombin	P00734	F2
	Proto-oncogene serine/threonine-protein kinase Pim-1	P11309	PIM1
	Tyrosine-protein kinase HCK	P08631	HCK
	Estrogen receptor	P03372	ESR1
	Complement factor B	P00751	CFB
	Cholinesterase	P06276	BCHE
	Progesterone receptor	P06401	PGR
	Peptidyl-prolyl cis-trans isomerase A	P62937	PPIA
	Mitogen-activated protein kinase 10	P53779	MAPK10
	Epidermal growth factor receptor	P00533	EGFR
	Mitogen-activated protein kinase 8	P45983	MAPK8
Moupinamide	Cathepsin D	P07339	CTSD
	Cyclin-dependent kinase 5 activator 1	Q15078	CDK5R1
	Peptidyl-prolyl cis-trans isomerase A	P62937	PPIA
	Peroxisome proliferator-activated receptor gamma	P37231	PPARG
	Carbonic anhydrase 2	P00918	CA2
	Carbonic anhydrase 1	O43570	CA12
	Estrogen receptor	P03372	ESR1
	Mitogen-activated protein kinase 10	P53779	MAPK10
	Liver carboxylesterase 1	P23141	CES1
	Glutaminyl-peptide cyclotransferase	Q16769	QPCT
	MAP kinase-activated protein kinase 2	P49137	MAPKAPK2
	Proto-oncogene serine/threonine-protein kinase Pim-1	P11309	PIM1
	Amine oxidase [flavin-containing] B	P27338	MAOB
	Epidermal growth factor receptor	P00533	EGFR
(e)-8β,17-epoxylabd-12-ene-15,16-dial	Aldo-keto reductase family 1 member C2	P52895	AKR1C2
	Carbonic anhydrase 2	P00918	CA2
	Bone morphogenetic protein 2	P12643	BMP2
	Vitamin D-binding protein	P02774	GC
	Serine/threonine-protein kinase Chk1	O14757	CHEK1
	Caspase-3	P42574	CASP3
	Proto-oncogene serine/threonine-protein kinase Pim-1	P11309	PIM1
	Peptidyl-prolyl cis-trans isomerase A	P62937	PPIA
	Progesterone receptor	P06401	PGR
	Glutathione S-transferase P	P09211	GSTP1
	Steryl-sulfatase	P08842	STS
	Androgen receptor	P10275	AR
	Caspase-7	P55210	CASP7
	Serum albumin	P02768	ALB
	MAP kinase-activated protein kinase 2	P49137	MAPKAPK2
	Apolipoprotein A-II	P02652	APOA2
	Mitogen-activated protein kinase 1	P28482	MAPK1
	Ephrin type-B receptor 4	P54760	EPHB4
(e)-citral	Serum albumin	P02768	ALB
	Bone morphogenetic protein 2	P12643	BMP2
	Apolipoprotein A-II	P02652	APOA2
	Proto-oncogene serine/threonine-protein kinase Pim-1	P11309	PIM1
	Transthyretin	P02766	TTR
	Carbonic anhydrase 2	P00918	CA2
	Caspase-7	P55210	CASP7
	Steryl-sulfatase	P08842	STS
	Aldo-keto reductase family 1 member C2	P52895	AKR1C2
	MAP kinase-activated protein kinase 2	P49137	MAPKAPK2
	Estrogen receptor	P03372	ESR1
	Androgen receptor	P10275	AR
	Prothrombin	P00734	F2
	Caspase-3	P42574	CASP3
	Cytochrome P450 19A1	P11511	CYP19A1
	Mitogen-activated protein kinase 1	P28482	MAPK1
	Peptidyl-prolyl cis-trans isomerase A	P62937	PPIA
	Aldose reductase	P15121	AKR1B1
	Ribosyldihydronicotinamide dehydrogenase [quinone]	P16083	NQO2
	Mitogen-activated protein kinase 10	P53779	MAPK10
	Aldo-keto reductase family 1 member C3	P42330	AKR1C3
	Ephrin type-B receptor 4	P54760	EPHB4
	Complement factor B	P00751	CFB
	Cyclin-A2	P20248	CCNA2
(e, e)-α-farnesene	Mitogen-activated protein kinase 1	P28482	MAPK1
	Amine oxidase [flavin-containing] B	P27338	MAOB
	Serum albumin	P02768	ALB
	Aldo-keto reductase family 1 member C2	P52895	AKR1C2
	Thyroid hormone receptor beta	P10828	THRB
	MAP kinase-activated protein kinase 2	P49137	MAPKAPK2
	Proto-oncogene serine/threonine-protein kinase Pim-1	P11309	PIM1
	Apolipoprotein A-II	P02652	APOA2
	Bone morphogenetic protein 2	P12643	BMP2
	Transthyretin	P02766	TTR
	Steryl-sulfatase	P08842	STS
	Kinesin-like protein KIF11	P52732	KIF11
	Caspase-7	P55210	CASP7
	Collagenase 3	P45452	MMP13
	Integrin alpha-L	P20701	ITGAL
	Vitamin D-binding protein	P02774	GC
	Peptidyl-prolyl cis-trans isomerase FKBP1A	P62942	FKBP1A
	SEC14-like protein 2	O76054	SEC14L2
(z)-citral	Apolipoprotein A-II	P02652	APOA2
	Serum albumin	P02768	ALB
	Bone morphogenetic protein 2	P12643	BMP2
	Steryl-sulfatase	P08842	STS
	Caspase-7	P55210	CASP7
	Carbonic anhydrase 2	P00918	CA2
	MAP kinase-activated protein kinase 2	P49137	MAPKAPK2
	Proto-oncogene serine/threonine-protein kinase Pim-1	P11309	PIM1
	Aldo-keto reductase family 1 member C2	P52895	AKR1C2
	Transthyretin	P02766	TTR
	Cyclin-A2	P20248	CCNA2
	Peptidyl-prolyl cis-trans isomerase A	P62937	PPIA
	Aldose reductase	P15121	AKR1B1
	Aldo-keto reductase family 1 member C3	P42330	AKR1C3
	Ribosyldihydronicotinamide dehydrogenase [quinone]	P16083	NQO2
	Prothrombin	P00734	F2
	Caspase-3	P42574	CASP3
	Mitogen-activated protein kinase 10	P53779	MAPK10
10-gingerol	Aldo-keto reductase family 1 member C2	P52895	AKR1C2
	Bone morphogenetic protein 2	P12643	BMP2
	Serum albumin	P02768	ALB
	Caspase-7	P55210	CASP7
	Steryl-sulfatase	P08842	STS
	Caspase-3	P42574	CASP3
	Proto-oncogene serine/threonine-protein kinase Pim-1	P11309	PIM1
	Thyroid hormone receptor beta	P10828	THRB
	Peroxisome proliferator-activated receptor gamma	P37231	PPARG
	Peptidyl-prolyl cis-trans isomerase A	P62937	PPIA
	MAP kinase-activated protein kinase 2	P49137	MAPKAPK2
	Transthyretin	P02766	TTR
	Cathepsin D	P07339	CTSD
	Carbonic anhydrase 2	P00918	CA2
	Aldose reductase	P15121	AKR1B1
	Apolipoprotein A-II	P02652	APOA2
	Glutathione S-transferase P	P09211	GSTP1
	Cholinesterase	P06276	BCHE
	Progesterone receptor	P06401	PGR
	Estrogen receptor	P03372	ESR1
	ADAM 17	P78536	ADAM17
	Beta-secretase 1	P56817	BACE1
	Chymase	P23946	CMA1
	Complement factor B	P00751	CFB
	Cytochrome P450 19A1	P11511	CYP19A1
	Mitogen-activated protein kinase 10	P53779	MAPK10
	Liver carboxylesterase 1	P23141	CES1
	Ephrin type-B receptor 4	P54760	EPHB4
	Androgen receptor	P10275	AR
	Purine nucleoside phosphorylase	P00491	PNP
	Cyclin-A2	P20248	CCNA2
	Cell division protein kinase 2	P24941	CDK2
	Serine/threonine-protein kinase Chk1	O14757	CHEK1
	Epidermal growth factor receptor	P00533	EGFR
	Mitogen-activated protein kinase 1	P28482	MAPK1
	Serine/threonine-protein kinase 6	O14965	AURKA
	Putative ATP-dependent Clp protease proteolytic subunit, mitochondrial	Q16740	CLPP
	Kinesin-like protein KIF11	P52732	KIF11
	Glutaminyl-peptide cyclotransferase	Q16769	QPCT
	Mitogen-activated protein kinase 14	Q16539	MAPK14
	Prothrombin	P00734	F2
2-heptanol	Carbonic anhydrase 2	P00918	CA2
	Peptidyl-prolyl cis-trans isomerase A	P62937	PPIA
	Cyclin-A2	P20248	CCNA2
2-nonanol	Bone morphogenetic protein 2	P12643	BMP2
	Androgen receptor	P10275	AR
	Putative ATP-dependent Clp protease proteolytic subunit, mitochondrial	Q16740	CLPP
	Aldo-keto reductase family 1 member C2	P52895	AKR1C2
	Carbonic anhydrase 2	P00918	CA2
	Cyclin-A2	P20248	CCNA2
	Vascular endothelial growth factor receptor 2	P35968	KDR
	Transthyretin	P02766	TTR
	Estrogen receptor	P03372	ESR1
	Proto-oncogene serine/threonine-protein kinase Pim-1	P11309	PIM1
	Cytochrome P450 19A1	P11511	CYP19A1
	Beta-secretase 1	P56817	BACE1
	Aldose reductase	P15121	AKR1B1
	Steryl-sulfatase	P08842	STS
3,5-diacetoxy-1-(4-hydroxy-3,5-dimethoxy-phenyl)-7-(4-hydroxy-3-methoxyphenyl)heptane	Peptidyl-prolyl cis-trans isomerase A	P62937	PPIA
	Mitogen-activated protein kinase 10	P53779	MAPK10
	Steryl-sulfatase	P08842	STS
	Glutathione S-transferase P	P09211	GSTP1
	Cholinesterase	P06276	BCHE
	Transthyretin	P02766	TTR
	Apolipoprotein A-II	P02652	APOA2
	Proto-oncogene serine/threonine-protein kinase Pim-1	P11309	PIM1
	Mitogen-activated protein kinase 8	P45983	MAPK8
	Kinesin-like protein KIF11	P52732	KIF11
	Carbonic anhydrase 2	P00918	CA2
	Aldo-keto reductase family 1 member C2	P52895	AKR1C2
	Liver carboxylesterase 1	P23141	CES1
	Bone morphogenetic protein 2	P12643	BMP2
	Peroxisome proliferator-activated receptor gamma	P37231	PPARG
	Chymase	P23946	CMA1
	Caspase-7	P55210	CASP7
	Cathepsin D	P07339	CTSD
	Androgen receptor	P10275	AR
	Complement factor B	P00751	CFB
	Estrogen receptor beta	Q92731	ESR2
	Triggering receptor expressed on myeloid cells 1	Q9NP99	TREM1
	Serum albumin	P02768	ALB
	Estrogen receptor	P03372	ESR1
	Cell division protein kinase 2	P24941	CDK2
	Epidermal growth factor receptor	P00533	EGFR
	Oxysterols receptor LXR-beta	P55055	NR1H2
	Serine/threonine-protein kinase Chk1	O14757	CHEK1
	Peptidyl-prolyl cis-trans isomerase FKBP1A	P62942	FKBP1A
	Purine nucleoside phosphorylase	P00491	PNP
	Serine/threonine-protein kinase 6	O14965	AURKA
	Aldose reductase	P15121	AKR1B1
	Stromelysin-1	P08254	MMP3
	Collagenase 3	P45452	MMP13
	Mitogen-activated protein kinase 1	P28482	MAPK1
5 ξ-hydroxy-1-(4-hydroxy-3,5-dimethoxy-phenyl)-7-(4-hydroxy-3-methoxyphenyl)-3-heptanone	Estrogen receptor	P03372	ESR1
	Triggering receptor expressed on myeloid cells 1	Q9NP99	TREM1
	Beta-secretase 1	P56817	BACE1
	Mitogen-activated protein kinase 14	Q16539	MAPK14
	Bone morphogenetic protein 2	P12643	BMP2
	Cathepsin S	P25774	CTSS
	Vascular endothelial growth factor receptor 2	P35968	KDR
	Mitogen-activated protein kinase 10	P53779	MAPK10
	Mitogen-activated protein kinase 1	P28482	MAPK1
	Amine oxidase [flavin-containing] B	P27338	MAOB
	Carbonic anhydrase 2	P00918	CA2
	Glutathione S-transferase P	P09211	GSTP1
	Estradiol 17-beta-dehydrogenase 11	Q8NBQ5	HSD17B11
	Peptidyl-prolyl cis-trans isomerase A	P62937	PPIA
	Cyclin-dependent kinase 5 activator 1	Q15078	CDK5R1
	Cytochrome P450 19A1	P11511	CYP19A1
	Proto-oncogene serine/threonine-protein kinase Pim-1	P11309	PIM1
	Thyroid hormone receptor beta	P10828	THRB
	MAP kinase-activated protein kinase 2	P49137	MAPKAPK2
	Complement factor B	P00751	CFB
	Caspase-3	P42574	CASP3
	Stromelysin-1	P08254	MMP3
	Seprase	Q12884	FAP
	Progesterone receptor	P06401	PGR
	Androgen receptor	P10275	AR
	Oxysterols receptor LXR-beta	P55055	NR1H2
	Heat shock cognate 71 kDa protein	P11142	HSPA8
	Tyrosine-protein kinase HCK	P08631	HCK
	Methionine aminopeptidase 1	P53582	METAP1
	Liver carboxylesterase 1	P23141	CES1
	Putative ATP-dependent Clp protease proteolytic subunit, mitochondrial	Q16740	CLPP
	Phosphatidylinositol-4,5-bisphosphate 3-kinase catalytic subunit gamma isoform	P48736	PIK3CG
	Cathepsin D	P07339	CTSD
	Purine nucleoside phosphorylase	P00491	PNP
	Chymase	P23946	CMA1
	Prothrombin	P00734	F2
	Transthyretin	P02766	TTR
	Glucosylceramidase	P04062	GBA
	Mitogen-activated protein kinase 8	P45983	MAPK8
	Aldose reductase	P15121	AKR1B1
	Macrophage migration inhibitory factor	P14174	MIF
	Probable ATP-dependent RNA helicase DDX6	P26196	DDX6
	Carbonic anhydrase 1	P00915	CA1
	Alpha-amylase 1	P04745	AMY1A
	Cathepsin L2	O60911	CTSV
	Cholinesterase	P06276	BCHE
	Peroxisome proliferator-activated receptor gamma	P37231	PPARG
	cAMP-specific 3,5-cyclic phosphodiesterase 4D	Q08499	PDE4D
	Aldo-keto reductase family 1 member C2	P52895	AKR1C2
	Serum albumin	P02768	ALB
	Steryl-sulfatase	P08842	STS
8-gingerol	Bone morphogenetic protein 2	P12643	BMP2
	Aldose reductase	P15121	AKR1B1
	Carbonic anhydrase 2	P00918	CA2
	Peptidyl-prolyl cis-trans isomerase A	P62937	PPIA
	Cholinesterase	P06276	BCHE
	Cathepsin D	P07339	CTSD
	Purine nucleoside phosphorylase	P00491	PNP
	Androgen receptor	P10275	AR
	Serine/threonine-protein kinase Chk1	O14757	CHEK1
	Cytochrome P450 19A1	P11511	CYP19A1
	Beta-secretase 1	P56817	BACE1
	Cyclin-dependent kinase 5 activator 1	Q15078	CDK5R1
	Glutathione S-transferase P	P09211	GSTP1
	Mitogen-activated protein kinase 14	Q16539	MAPK14
	Proto-oncogene serine/threonine-protein kinase Pim-1	P11309	PIM1
	Epidermal growth factor receptor	P00533	EGFR
	Prothrombin	P00734	F2
	Ephrin type-B receptor 4	P54760	EPHB4
	Heat shock protein HSP 90-alpha	P07900	HSP90AA1
	Transthyretin	P02766	TTR
	Caspase-3	P42574	CASP3
	Mitogen-activated protein kinase 10	P53779	MAPK10
	Aldo-keto reductase family 1 member C2	P52895	AKR1C2
	Collagenase 3	P45452	MMP13
	Serine/threonine-protein kinase 6	O14965	AURKA
	Progesterone receptor	P06401	PGR
	Caspase-7	P55210	CASP7
	Aldo-keto reductase family 1 member C3	P42330	AKR1C3
alpha-limonene	Apolipoprotein A-II	P02652	APOA2
	Steryl-sulfatase	P08842	STS
	Serum albumin	P02768	ALB
beta-farnesene	Transthyretin	P02766	TTR
	Kinesin-like protein KIF11	P52732	KIF11
	Serum albumin	P02768	ALB
	Proto-oncogene serine/threonine-protein kinase Pim-1	P11309	PIM1
	MAP kinase-activated protein kinase 2	P49137	MAPKAPK2
	Caspase-7	P55210	CASP7
	Apolipoprotein A-II	P02652	APOA2
	Bone morphogenetic protein 2	P12643	BMP2
	Steryl-sulfatase	P08842	STS
	Peptidyl-prolyl cis-trans isomerase FKBP1A	P62942	FKBP1A
	Aldo-keto reductase family 1 member C2	P52895	AKR1C2
	Mitogen-activated protein kinase 1	P28482	MAPK1
	Thyroid hormone receptor beta	P10828	THRB
	Amine oxidase [flavin-containing] B	P27338	MAOB
	Collagenase 3	P45452	MMP13
	Vitamin D-binding protein	P02774	GC
	Mitogen-activated protein kinase 14	Q16539	MAPK14
beta-phellandrene	Apolipoprotein A-II	P02652	APOA2
	Steryl-sulfatase	P08842	STS
	Serum albumin	P02768	ALB
bisabolene	Aldo-keto reductase family 1 member C2	P52895	AKR1C2
	Thyroid hormone receptor beta	P10828	THRB
	Apolipoprotein A-II	P02652	APOA2
	Steryl-sulfatase	P08842	STS
	Caspase-7	P55210	CASP7
	Bone morphogenetic protein 2	P12643	BMP2
	Serum albumin	P02768	ALB
	MAP kinase-activated protein kinase 2	P49137	MAPKAPK2
	Proto-oncogene serine/threonine-protein kinase Pim-1	P11309	PIM1
	Mitogen-activated protein kinase 1	P28482	MAPK1
	Vitamin D-binding protein	P02774	GC
	Kinesin-like protein KIF11	P52732	KIF11
	Collagenase 3	P45452	MMP13
	Peptidyl-prolyl cis-trans isomerase FKBP1A	P62942	FKBP1A
	Amine oxidase [flavin-containing] B	P27338	MAOB
	Transthyretin	P02766	TTR
cineole	Vitamin D-binding protein	P02774	GC
	Serum albumin	P02768	ALB
	Aldo-keto reductase family 1 member C2	P52895	AKR1C2
	Bone morphogenetic protein 2	P12643	BMP2
	Proto-oncogene serine/threonine-protein kinase Pim-1	P11309	PIM1
	Caspase-7	P55210	CASP7
	MAP kinase-activated protein kinase 2	P49137	MAPKAPK2
	Androgen receptor	P10275	AR
	Aldo-keto reductase family 1 member C1	Q04828	AKR1C1
cinerins	Complement factor B	P00751	CFB
	Progesterone receptor	P06401	PGR
	Proto-oncogene serine/threonine-protein kinase Pim-1	P11309	PIM1
	Aldo-keto reductase family 1 member C2	P52895	AKR1C2
	Prothrombin	P00734	F2
	Mitogen-activated protein kinase 10	P53779	MAPK10
	Bone morphogenetic protein 2	P12643	BMP2
	Amine oxidase [flavin-containing] B	P27338	MAOB
	Thyroid hormone receptor beta	P10828	THRB
	Kinesin-like protein KIF11	P52732	KIF11
	Mitogen-activated protein kinase 1	P28482	MAPK1
	Carbonic anhydrase 2	P00918	CA2
	Transthyretin	P02766	TTR
	Stromelysin-1	P08254	MMP3
	Integrin alpha-L	P20701	ITGAL
	Collagenase 3	P45452	MMP13
	Oxysterols receptor LXR-beta	P55055	NR1H2
	Mitogen-activated protein kinase 8	P45983	MAPK8
	Cytochrome P450 19A1	P11511	CYP19A1
	Ribosyldihydronicotinamide dehydrogenase [quinone]	P16083	NQO2
	Steryl-sulfatase	P08842	STS
	MAP kinase-activated protein kinase 2	P49137	MAPKAPK2
	Serum albumin	P02768	ALB
	Peptidyl-prolyl cis-trans isomerase FKBP1A	P62942	FKBP1A
	Peptidyl-prolyl cis-trans isomerase A	P62937	PPIA
	Apolipoprotein A-II	P02652	APOA2
	Triggering receptor expressed on myeloid cells 1	Q9NP99	TREM1
	Cholinesterase	P06276	BCHE
	Liver carboxylesterase 1	P23141	CES1
	Cyclin-dependent kinase 5 activator 1	Q15078	CDK5R1
	Androgen receptor	P10275	AR
	Ephrin type-B receptor 4	P54760	EPHB4
	Caspase-7	P55210	CASP7
	Caspase-3	P42574	CASP3
	cAMP-specific 3,5-cyclic phosphodiesterase 4B	Q07343	PDE4B
	Vitamin D-binding protein	P02774	GC
d-limonene	Apolipoprotein A-II	P02652	APOA2
	Steryl-sulfatase	P08842	STS
	Serum albumin	P02768	ALB
decane	Bone morphogenetic protein 2	P12643	BMP2
	Mitogen-activated protein kinase 1	P28482	MAPK1
	Aldo-keto reductase family 1 member C2	P52895	AKR1C2
	Proto-oncogene serine/threonine-protein kinase Pim-1	P11309	PIM1
	Thyroid hormone receptor beta	P10828	THRB
	Serum albumin	P02768	ALB
	Amine oxidase [flavin-containing] B	P27338	MAOB
	Steryl-sulfatase	P08842	STS
	Caspase-7	P55210	CASP7
	Apolipoprotein A-II	P02652	APOA2
	Kinesin-like protein KIF11	P52732	KIF11
	MAP kinase-activated protein kinase 2	P49137	MAPKAPK2
	Vitamin D-binding protein	P02774	GC
geranyl acetate	Aldo-keto reductase family 1 member C2	P52895	AKR1C2
	Bone morphogenetic protein 2	P12643	BMP2
	Steryl-sulfatase	P08842	STS
	Serum albumin	P02768	ALB
	Cyclin-A2	P20248	CCNA2
	Apolipoprotein A-II	P02652	APOA2
	Caspase-7	P55210	CASP7
	Carbonic anhydrase 2	P00918	CA2
	Proto-oncogene serine/threonine-protein kinase Pim-1	P11309	PIM1
	Transthyretin	P02766	TTR
	Prothrombin	P00734	F2
	Androgen receptor	P10275	AR
	Glutathione S-transferase P	P09211	GSTP1
	Cytochrome P450 19A1	P11511	CYP19A1
	Oxysterols receptor LXR-beta	P55055	NR1H2
	MAP kinase-activated protein kinase 2	P49137	MAPKAPK2
	Integrin alpha-L	P20701	ITGAL
	Caspase-3	P42574	CASP3
	Ribosyldihydronicotinamide dehydrogenase [quinone]	P16083	NQO2
	Peptidyl-prolyl cis-trans isomerase A	P62937	PPIA
	Aldo-keto reductase family 1 member C3	P42330	AKR1C3
	Aldose reductase	P15121	AKR1B1
	Cholinesterase	P06276	BCHE
	Estrogen receptor	P03372	ESR1
	Ephrin type-B receptor 4	P54760	EPHB4
	Mitogen-activated protein kinase 1	P28482	MAPK1
	Chymase	P23946	CMA1
gingerenone c	Cyclin-dependent kinase 5 activator 1	Q15078	CDK5R1
	Glutathione S-transferase P	P09211	GSTP1
	Mitogen-activated protein kinase 10	P53779	MAPK10
	Vascular endothelial growth factor receptor 2	P35968	KDR
	Mitogen-activated protein kinase 14	Q16539	MAPK14
	Beta-secretase 1	P56817	BACE1
	Cathepsin D	P07339	CTSD
	Complement factor B	P00751	CFB
	Mitogen-activated protein kinase 8	P45983	MAPK8
	Peroxisome proliferator-activated receptor gamma	P37231	PPARG
	MAP kinase-activated protein kinase 2	P49137	MAPKAPK2
	Stromelysin-1	P08254	MMP3
	Serine/threonine-protein kinase 6	O14965	AURKA
	Cell division protein kinase 2	P24941	CDK2
	Cathepsin L2	O60911	CTSV
	Proto-oncogene serine/threonine-protein kinase Pim-1	P11309	PIM1
	cAMP-specific 3,5-cyclic phosphodiesterase 4B	Q07343	PDE4B
	Carbonic anhydrase 2	P00918	CA2
	Mitogen-activated protein kinase 1	P28482	MAPK1
	Epidermal growth factor receptor	P00533	EGFR
	Liver carboxylesterase 1	P23141	CES1
	Progesterone receptor	P06401	PGR
	Glucosylceramidase	P04062	GBA
	Cyclin-A2	P20248	CCNA2
	Kinesin-like protein KIF11	P52732	KIF11
	Prothrombin	P00734	F2
	Estrogen receptor	P03372	ESR1
	Transthyretin	P02766	TTR
	Serine/threonine-protein kinase Chk1	O14757	CHEK1
	Ephrin type-B receptor 4	P54760	EPHB4
gingerol	Peptidyl-prolyl cis-trans isomerase A	P62937	PPIA
	Carbonic anhydrase 2	P00918	CA2
	Cyclin-A2	P20248	CCNA2
	Glutathione S-transferase P	P09211	GSTP1
	Mitogen-activated protein kinase 14	Q16539	MAPK14
	Beta-secretase 1	P56817	BACE1
	Cholinesterase	P06276	BCHE
	Amine oxidase [flavin-containing] B	P27338	MAOB
	Oxysterols receptor LXR-beta	P55055	NR1H2
	Estrogen receptor	P03372	ESR1
	Ephrin type-B receptor 4	P54760	EPHB4
	Serine/threonine-protein kinase Chk1	O14757	CHEK1
	Caspase-7	P55210	CASP7
	Epidermal growth factor receptor	P00533	EGFR
	Vascular endothelial growth factor receptor 2	P35968	KDR
	Mitogen-activated protein kinase 10	P53779	MAPK10
	Stromelysin-1	P08254	MMP3
	Purine nucleoside phosphorylase	P00491	PNP
	Proto-oncogene serine/threonine-protein kinase Pim-1	P11309	PIM1
	Triggering receptor expressed on myeloid cells 1	Q9NP99	TREM1
	cAMP-specific 3,5-cyclic phosphodiesterase 4B	Q07343	PDE4B
	Aldose reductase	P15121	AKR1B1
	Chymase	P23946	CMA1
	Liver carboxylesterase 1	P23141	CES1
	Progesterone receptor	P06401	PGR
ginketin	Collagenase 3	P45452	MMP13
	Transthyretin	P02766	TTR
	Tyrosine-protein kinase HCK	P08631	HCK
	Carbonic anhydrase 2	P00918	CA2
	Purine nucleoside phosphorylase	P00491	PNP
	Cathepsin D	P07339	CTSD
	Progesterone receptor	P06401	PGR
	Estrogen receptor	P03372	ESR1
	Carbonic anhydrase 1	O43570	CA12
	Cholinesterase	P06276	BCHE
	Proto-oncogene serine/threonine-protein kinase Pim-1	P11309	PIM1
	Cell division protein kinase 2	P24941	CDK2
	Liver carboxylesterase 1	P23141	CES1
	Prothrombin	P00734	F2
	Heat shock cognate 71 kDa protein	P11142	HSPA8
	Mitogen-activated protein kinase 8	P45983	MAPK8
	MAP kinase-activated protein kinase 2	P49137	MAPKAPK2
	Mitogen-activated protein kinase 14	Q16539	MAPK14
	Peroxisome proliferator-activated receptor gamma	P37231	PPARG
	Aldo-keto reductase family 1 member C2	P52895	AKR1C2
	Oxysterols receptor LXR-beta	P55055	NR1H2
	Estrogen receptor beta	Q92731	ESR2
	Thyroid hormone receptor beta	P10828	THRB
	Cytochrome P450 19A1	P11511	CYP19A1
	Peptidyl-prolyl cis-trans isomerase A	P62937	PPIA
	Beta-secretase 1	P56817	BACE1
	Cell division protein kinase 6	Q00534	CDK6
	Androgen receptor	P10275	AR
	Mitogen-activated protein kinase 10	P53779	MAPK10
isogingerenone b	Seprase	Q12884	FAP
	Peroxisome proliferator-activated receptor gamma	P37231	PPARG
	Mitogen-activated protein kinase 10	P53779	MAPK10
	Carbonic anhydrase 2	P00918	CA2
	Glutathione S-transferase P	P09211	GSTP1
	MAP kinase-activated protein kinase 2	P49137	MAPKAPK2
	Cathepsin D	P07339	CTSD
	Mitogen-activated protein kinase 14	Q16539	MAPK14
	Stromelysin-1	P08254	MMP3
	Epidermal growth factor receptor	P00533	EGFR
	Complement factor B	P00751	CFB
	Mitogen-activated protein kinase 8	P45983	MAPK8
	Vascular endothelial growth factor receptor 2	P35968	KDR
	Serine/threonine-protein kinase Chk1	O14757	CHEK1
	Cyclin-dependent kinase 5 activator 1	Q15078	CDK5R1
	Reticulon-4 receptor	Q9BZR6	RTN4R
	Kinesin-like protein KIF11	P52732	KIF11
	Estrogen receptor beta	Q92731	ESR2
	Mitogen-activated protein kinase 1	P28482	MAPK1
	Purine nucleoside phosphorylase	P00491	PNP
	Glucosylceramidase	P04062	GBA
	Triggering receptor expressed on myeloid cells 1	Q9NP99	TREM1
	Ephrin type-B receptor 4	P54760	EPHB4
	cAMP-specific 3,5-cyclic phosphodiesterase 4B	Q07343	PDE4B
	Proto-oncogene serine/threonine-protein kinase Pim-1	P11309	PIM1
	Aldose reductase	P15121	AKR1B1
	Annexin A5	P08758	ANXA5
	Beta-secretase 1	P56817	BACE1
	Serine/threonine-protein kinase 6	O14965	AURKA
	Cyclin-A2	P20248	CCNA2
linalool	Mitogen-activated protein kinase 1	P28482	MAPK1
	Liver carboxylesterase 1	P23141	CES1
	Peptidyl-prolyl cis-trans isomerase A	P62937	PPIA
	Carbonic anhydrase 2	P00918	CA2
	Proto-oncogene serine/threonine-protein kinase Pim-1	P11309	PIM1
	Mitogen-activated protein kinase 14	Q16539	MAPK14
	Vascular endothelial growth factor receptor 2	P35968	KDR
	Mitogen-activated protein kinase 10	P53779	MAPK10
	Serum albumin	P02768	ALB
	Leukotriene A-4 hydrolase	P09960	LTA4H
	Apolipoprotein A-II	P02652	APOA2
	Steryl-sulfatase	P08842	STS
	MAP kinase-activated protein kinase 2	P49137	MAPKAPK2
	Cell division protein kinase 2	P24941	CDK2
	Caspase-7	P55210	CASP7
methyl hexadecanate	Bone morphogenetic protein 2	P12643	BMP2
	Mitogen-activated protein kinase 1	P28482	MAPK1
	Thyroid hormone receptor beta	P10828	THRB
	Carbonic anhydrase 2	P00918	CA2
	Proto-oncogene serine/threonine-protein kinase Pim-1	P11309	PIM1
	Amine oxidase [flavin-containing] B	P27338	MAOB
	Serum albumin	P02768	ALB
	Steryl-sulfatase	P08842	STS
	Peptidyl-prolyl cis-trans isomerase A	P62937	PPIA
	Caspase-7	P55210	CASP7
	MAP kinase-activated protein kinase 2	P49137	MAPKAPK2
	Aldose reductase	P15121	AKR1B1
	Apolipoprotein A-II	P02652	APOA2
	Cholinesterase	P06276	BCHE
	Transthyretin	P02766	TTR
	Glutathione S-transferase P	P09211	GSTP1
	Serine/threonine-protein kinase Chk1	O14757	CHEK1
	Peroxisome proliferator-activated receptor gamma	P37231	PPARG
	Ephrin type-B receptor 4	P54760	EPHB4
	Collagenase 3	P45452	MMP13
	Oxysterols receptor LXR-beta	P55055	NR1H2
	Caspase-3	P42574	CASP3
	Aldo-keto reductase family 1 member C2	P52895	AKR1C2
	Kinesin-like protein KIF11	P52732	KIF11
	Aldo-keto reductase family 1 member C3	P42330	AKR1C3
	Vitamin D-binding protein	P02774	GC
	Ribosyldihydronicotinamide dehydrogenase [quinone]	P16083	NQO2
nonaldehyde	Bone morphogenetic protein 2	P12643	BMP2
	Carbonic anhydrase 2	P00918	CA2
	Caspase-3	P42574	CASP3
	Aldo-keto reductase family 1 member C3	P42330	AKR1C3
	Proto-oncogene serine/threonine-protein kinase Pim-1	P11309	PIM1
	Aldose reductase	P15121	AKR1B1
	Peptidyl-prolyl cis-trans isomerase A	P62937	PPIA
	Cyclin-A2	P20248	CCNA2
	Aldo-keto reductase family 1 member C2	P52895	AKR1C2
p-cymene	Apolipoprotein A-II	P02652	APOA2
	Steryl-sulfatase	P08842	STS
	Serum albumin	P02768	ALB
sexangularetin	Tyrosine-protein kinase HCK	P08631	HCK
	Estrogen receptor	P03372	ESR1
	Carbonic anhydrase 2	P00918	CA2
	Complement factor B	P00751	CFB
	Proto-oncogene serine/threonine-protein kinase Pim-1	P11309	PIM1
	Epidermal growth factor receptor	P00533	EGFR
	Prothrombin	P00734	F2
	Mitogen-activated protein kinase 10	P53779	MAPK10
	Peptidyl-prolyl cis-trans isomerase A	P62937	PPIA
	Liver carboxylesterase 1	P23141	CES1
	Mitogen-activated protein kinase 8	P45983	MAPK8
	Angiogenin	P03950	ANG
zingiberol	Mitogen-activated protein kinase 1	P28482	MAPK1
	Caspase-3	P42574	CASP3
	Carbonic anhydrase 2	P00918	CA2
	Aldo-keto reductase family 1 member C2	P52895	AKR1C2
	Bone morphogenetic protein 2	P12643	BMP2
	Estradiol 17-beta-dehydrogenase 11	Q8NBQ5	HSD17B11
zingiberone	Steryl-sulfatase	P08842	STS
	Serum albumin	P02768	ALB
	Apolipoprotein A-II	P02652	APOA2
	Transthyretin	P02766	TTR
	Stromelysin-1	P08254	MMP3
	Proto-oncogene serine/threonine-protein kinase Pim-1	P11309	PIM1
	Kinesin-like protein KIF11	P52732	KIF11
	Complement factor B	P00751	CFB
	MAP kinase-activated protein kinase 2	P49137	MAPKAPK2
	Mitogen-activated protein kinase 10	P53779	MAPK10
	Mitogen-activated protein kinase 8	P45983	MAPK8
	Liver carboxylesterase 1	P23141	CES1
	Mitogen-activated protein kinase 1	P28482	MAPK1
	Cyclin-dependent kinase 5 activator 1	Q15078	CDK5R1
	Carbonic anhydrase 2	P00918	CA2
[10]-gingerdione	Bone morphogenetic protein 2	P12643	BMP2
	Transthyretin	P02766	TTR
	Ribosyldihydronicotinamide dehydrogenase [quinone]	P16083	NQO2
	Glutathione S-transferase P	P09211	GSTP1
	Caspase-3	P42574	CASP3
	Aldo-keto reductase family 1 member C3	P42330	AKR1C3
	Purine nucleoside phosphorylase	P00491	PNP
	Complement factor B	P00751	CFB
	Serine/threonine-protein kinase Chk1	O14757	CHEK1
	Epidermal growth factor receptor	P00533	EGFR
	Proto-oncogene serine/threonine-protein kinase Pim-1	P11309	PIM1
	Carbonic anhydrase 2	P00918	CA2
	cAMP-specific 3,5-cyclic phosphodiesterase 4B	Q07343	PDE4B
	Cyclin-dependent kinase 5 activator 1	Q15078	CDK5R1
	Aldo-keto reductase family 1 member C2	P52895	AKR1C2
	Mitogen-activated protein kinase 10	P53779	MAPK10
	Peptidyl-prolyl cis-trans isomerase A	P62937	PPIA
	Kinesin-like protein KIF11	P52732	KIF11
[10]-gingerol	Aldo-keto reductase family 1 member C2	P52895	AKR1C2
	Bone morphogenetic protein 2	P12643	BMP2
	Serum albumin	P02768	ALB
	Caspase-7	P55210	CASP7
	Steryl-sulfatase	P08842	STS
	Caspase-3	P42574	CASP3
	Proto-oncogene serine/threonine-protein kinase Pim-1	P11309	PIM1
	Thyroid hormone receptor beta	P10828	THRB
	Peroxisome proliferator-activated receptor gamma	P37231	PPARG
	Peptidyl-prolyl cis-trans isomerase A	P62937	PPIA
	MAP kinase-activated protein kinase 2	P49137	MAPKAPK2
	Transthyretin	P02766	TTR
	Cathepsin D	P07339	CTSD
	Carbonic anhydrase 2	P00918	CA2
	Aldose reductase	P15121	AKR1B1
	Apolipoprotein A-II	P02652	APOA2
	Glutathione S-transferase P	P09211	GSTP1
	Cholinesterase	P06276	BCHE
	Progesterone receptor	P06401	PGR
	Estrogen receptor	P03372	ESR1
	ADAM 17	P78536	ADAM17
	Beta-secretase 1	P56817	BACE1
	Chymase	P23946	CMA1
	Complement factor B	P00751	CFB
	Cytochrome P450 19A1	P11511	CYP19A1
	Mitogen-activated protein kinase 10	P53779	MAPK10
	Liver carboxylesterase 1	P23141	CES1
	Ephrin type-B receptor 4	P54760	EPHB4
	Androgen receptor	P10275	AR
	Purine nucleoside phosphorylase	P00491	PNP
	Cyclin-A2	P20248	CCNA2
	Cell division protein kinase 2	P24941	CDK2
	Serine/threonine-protein kinase Chk1	O14757	CHEK1
	Epidermal growth factor receptor	P00533	EGFR
	Mitogen-activated protein kinase 1	P28482	MAPK1
	Serine/threonine-protein kinase 6	O14965	AURKA
	Putative ATP-dependent Clp protease proteolytic subunit, mitochondrial	Q16740	CLPP
	Kinesin-like protein KIF11	P52732	KIF11
	Glutaminyl-peptide cyclotransferase	Q16769	QPCT
	Mitogen-activated protein kinase 14	Q16539	MAPK14
	Prothrombin	P00734	F2
[8]-gingerol	Bone morphogenetic protein 2	P12643	BMP2
	Aldose reductase	P15121	AKR1B1
	Carbonic anhydrase 2	P00918	CA2
	Peptidyl-prolyl cis-trans isomerase A	P62937	PPIA
	Cholinesterase	P06276	BCHE
	Cathepsin D	P07339	CTSD
	Purine nucleoside phosphorylase	P00491	PNP
	Androgen receptor	P10275	AR
	Serine/threonine-protein kinase Chk1	O14757	CHEK1
	Cytochrome P450 19A1	P11511	CYP19A1
	Beta-secretase 1	P56817	BACE1
	Cyclin-dependent kinase 5 activator 1	Q15078	CDK5R1
	Glutathione S-transferase P	P09211	GSTP1
	Mitogen-activated protein kinase 14	Q16539	MAPK14
	Proto-oncogene serine/threonine-protein kinase Pim-1	P11309	PIM1
	Epidermal growth factor receptor	P00533	EGFR
	Prothrombin	P00734	F2
	Ephrin type-B receptor 4	P54760	EPHB4
	Heat shock protein HSP 90-alpha	P07900	HSP90AA1
	Transthyretin	P02766	TTR
	Caspase-3	P42574	CASP3
	Mitogen-activated protein kinase 10	P53779	MAPK10
	Aldo-keto reductase family 1 member C2	P52895	AKR1C2
	Collagenase 3	P45452	MMP13
	Serine/threonine-protein kinase 6	O14965	AURKA
	Progesterone receptor	P06401	PGR
	Caspase-7	P55210	CASP7
	Aldo-keto reductase family 1 member C3	P42330	AKR1C3
α-curcumene	Thyroid hormone receptor beta	P10828	THRB
	Caspase-7	P55210	CASP7
	Kinesin-like protein KIF11	P52732	KIF11
	Proto-oncogene serine/threonine-protein kinase Pim-1	P11309	PIM1
	Bone morphogenetic protein 2	P12643	BMP2
	Serum albumin	P02768	ALB
	Steryl-sulfatase	P08842	STS
	Apolipoprotein A-II	P02652	APOA2
	MAP kinase-activated protein kinase 2	P49137	MAPKAPK2
	Aldo-keto reductase family 1 member C2	P52895	AKR1C2
	Mitogen-activated protein kinase 1	P28482	MAPK1
	Collagenase 3	P45452	MMP13
	Integrin alpha-L	P20701	ITGAL
	Vitamin D-binding protein	P02774	GC
	Transthyretin	P02766	TTR
	Peptidyl-prolyl cis-trans isomerase FKBP1A	P62942	FKBP1A
α-phellandrene	Steryl-sulfatase	P08842	STS
	Apolipoprotein A-II	P02652	APOA2
	Serum albumin	P02768	ALB
β-bisabolene	Serum albumin	P02768	ALB
	Thyroid hormone receptor beta	P10828	THRB
	Apolipoprotein A-II	P02652	APOA2
	Bone morphogenetic protein 2	P12643	BMP2
	Steryl-sulfatase	P08842	STS
	Proto-oncogene serine/threonine-protein kinase Pim-1	P11309	PIM1
	Aldo-keto reductase family 1 member C2	P52895	AKR1C2
	MAP kinase-activated protein kinase 2	P49137	MAPKAPK2
	Caspase-7	P55210	CASP7
	Collagenase 3	P45452	MMP13
	Mitogen-activated protein kinase 1	P28482	MAPK1
	Kinesin-like protein KIF11	P52732	KIF11
	Vitamin D-binding protein	P02774	GC
	Amine oxidase [flavin-containing] B	P27338	MAOB
	Transthyretin	P02766	TTR
[(1S)-3-[(E)-but-2-enyl]-2-methyl-4-oxo-1-cyclopent-2-enyl] (1R,3R)-3-[(E)-3-methoxy-2-methyl-3-oxoprop-1-enyl]-2,2-dimethylcyclopropane-1-carboxylate	Mitogen-activated protein kinase 10	P53779	MAPK10
	Aldo-keto reductase family 1 member C3	P42330	AKR1C3
	Complement factor B	P00751	CFB
	Aldo-keto reductase family 1 member C2	P52895	AKR1C2
	Stromelysin-1	P08254	MMP3
	MAP kinase-activated protein kinase 2	P49137	MAPKAPK2
	Amine oxidase [flavin-containing] B	P27338	MAOB
	Proto-oncogene serine/threonine-protein kinase Pim-1	P11309	PIM1
	Collagenase 3	P45452	MMP13
	Phosphatidylinositol-4,5-bisphosphate 3-kinase catalytic subunit gamma isoform	P48736	PIK3CG
	Integrin alpha-L	P20701	ITGAL
	Mitogen-activated protein kinase 8	P45983	MAPK8
	Peptidyl-prolyl cis-trans isomerase A	P62937	PPIA
	Kinesin-like protein KIF11	P52732	KIF11
	Cholinesterase	P06276	BCHE
	Carbonic anhydrase 2	P00918	CA2
	Androgen receptor	P10275	AR
	Transthyretin	P02766	TTR
	Progesterone receptor	P06401	PGR
	Prothrombin	P00734	F2
	Bone morphogenetic protein 2	P12643	BMP2
	Purine nucleoside phosphorylase	P00491	PNP
	Caspase-7	P55210	CASP7
	Triggering receptor expressed on myeloid cells 1	Q9NP99	TREM1
	Chymase	P23946	CMA1
	Oxysterols receptor LXR-beta	P55055	NR1H2
	Cathepsin D	P07339	CTSD
	Mitogen-activated protein kinase 1	P28482	MAPK1
	Serum albumin	P02768	ALB
	Steryl-sulfatase	P08842	STS
	Mitogen-activated protein kinase 14	Q16539	MAPK14
	Apolipoprotein A-II	P02652	APOA2
	Peroxisome proliferator-activated receptor gamma	P37231	PPARG
	Glutathione S-transferase P	P09211	GSTP1
	Ephrin type-B receptor 4	P54760	EPHB4
	Aldose reductase	P15121	AKR1B1
	Mineralocorticoid receptor	P08235	NR3C2
	Cyclin-A2	P20248	CCNA2
	Peptidyl-prolyl cis-trans isomerase FKBP1A	P62942	FKBP1A
	Cytochrome P450 19A1	P11511	CYP19A1
beta-sitosterol	Aldo-keto reductase family 1 member C2	P52895	AKR1C2
	Amine oxidase [flavin-containing] B	P27338	MAOB
	Proto-oncogene serine/threonine-protein kinase Pim-1	P11309	PIM1
	Bone morphogenetic protein 2	P12643	BMP2
	Steryl-sulfatase	P08842	STS
	MAP kinase-activated protein kinase 2	P49137	MAPKAPK2
	Apolipoprotein A-II	P02652	APOA2
	Caspase-7	P55210	CASP7
	Thyroid hormone receptor beta	P10828	THRB
	Carbonic anhydrase 2	P00918	CA2
	Serum albumin	P02768	ALB
	Mitogen-activated protein kinase 1	P28482	MAPK1
	Progesterone receptor	P06401	PGR
	Mineralocorticoid receptor	P08235	NR3C2
	Estradiol 17-beta-dehydrogenase 1	P14061	HSD17B1
	Collagenase 3	P45452	MMP13
	Kinesin-like protein KIF11	P52732	KIF11
	Nuclear receptor ROR-alpha	P35398	RORA
	SEC14-like protein 2	O76054	SEC14L2
sitosterol	Aldo-keto reductase family 1 member C2	P52895	AKR1C2
	Bone morphogenetic protein 2	P12643	BMP2
	Amine oxidase [flavin-containing] B	P27338	MAOB
	Serum albumin	P02768	ALB
	Apolipoprotein A-II	P02652	APOA2
	Steryl-sulfatase	P08842	STS
	MAP kinase-activated protein kinase 2	P49137	MAPKAPK2
	Thyroid hormone receptor beta	P10828	THRB
	Proto-oncogene serine/threonine-protein kinase Pim-1	P11309	PIM1
	Caspase-7	P55210	CASP7
	Collagenase 3	P45452	MMP13
	Androgen receptor	P10275	AR
	Carbonic anhydrase 2	P00918	CA2
	Kinesin-like protein KIF11	P52732	KIF11
	Nuclear receptor ROR-alpha	P35398	RORA
	Progesterone receptor	P06401	PGR
	Mitogen-activated protein kinase 1	P28482	MAPK1
