# Supplementary material for: Exploring the Pharmacological Mechanism of the Herb Pair “HuangLian-GanJiang” against Colorectal Cancer Based on Network Pharmacology
Source: Evid Based Complement Alternat Med. 2019 Nov 29;2019:2735050. doi: 10.1155/2019/2735050 (PMC6906823; doi:10.1155/2019/2735050)
Supplement: Supplementary Materials — Table S1: chemical compounds of HL-GJ from TCMSP. Table S2: chemical compounds of HL-GJ from TCMID. Table S3: compounds in HL-GJ and corresponding targets. Table S4: CRC targets. Table S5: topological parameters for PPI Network. Table S6: topological parameters for compound nodes. Table S7: Gene Ontology (BP) biological process analysis. Table S8: Gene Ontology (MF) molecular function analysis. Table S9: pathway analysis. [file 2735050.f1.zip › 2735050.f1/Table S4.xlsx]

## Sheet: Sheet1
Table S4 CRC Targets
Protein name	Uniprot	Gene Symbol	Database
MutL, E. COLI, HOMOLOG OF, 1; MLH1	P40692	MLH1	OMIM
MutS, E. COLI, HOMOLOG OF, 2; MSH2	P43246	MSH2	OMIM
APC GENE; APC	P25054	APC	OMIM
MutS, E. COLI, HOMOLOG OF, 6; MSH6	P52701	MSH6	OMIM
POSTMEIOTIC SEGREGATION INCREASED, S. CEREVISIAE, 2; PMS2	P54278	PMS2	OMIM
V-KI-RAS2 KIRSTEN RAT SARCOMA VIRAL ONCOGENE HOMOLOG; KRAS	P01116	KRAS	OMIM
MutL, E. COLI, HOMOLOG OF, 3; MLH3	Q9UHC1	MLH3	OMIM
AXIS INHIBITOR 2; AXIN2	Q9Y2T1	AXIN2	OMIM
DCC NETRIN 1 RECEPTOR; DCC	P43146	DCC	OMIM
MOTHERS AGAINST DECAPENTAPLEGIC, DROSOPHILA, HOMOLOG OF, 4; SMAD4	Q13485	SMAD4	OMIM
MutY, E. COLI, HOMOLOG OF; MUTYH	Q9UIF7	MUTYH	OMIM
MOTHERS AGAINST DECAPENTAPLEGIC, DROSOPHILA, HOMOLOG OF, 2; SMAD2	Q15796	SMAD2	OMIM
CATENIN, BETA-1; CTNNB1	P35222	CTNNB1	OMIM
TRANSCRIPTION FACTOR 7-LIKE 2; TCF7L2	Q9NQB0	TCF7L2	OMIM
POLYMERASE, DNA, EPSILON; POLE	Q07864	POLE	OMIM
V-RAF MURINE SARCOMA VIRAL ONCOGENE HOMOLOG B1; BRAF	P15056	BRAF	OMIM
SECRETED FRIZZLED-RELATED PROTEIN 1; SFRP1	Q8N474	SFRP1	OMIM
PHOSPHATIDYLINOSITOL 3-KINASE, CATALYTIC, ALPHA; PIK3CA	P42336	PIK3CA	OMIM
BUDDING UNINHIBITED BY BENZIMIDAZOLES 1, S. CEREVISIAE, HOMOLOG OF; BUB1	O43683	BUB1	OMIM
POLYMERASE (DNA-DIRECTED), DELTA 1, CATALYTIC SUBUNIT; POLD1	P28340	POLD1	OMIM
TRANSFORMING GROWTH FACTOR-BETA RECEPTOR, TYPE II; TGFBR2	P37173	TGFBR2	OMIM
CADHERIN 1; CDH1	P12830	CDH1	OMIM
CYCLIN D1; CCND1	P24385	CCND1	OMIM
INSULIN-LIKE GROWTH FACTOR II; IGF2	P01344	IGF2	OMIM
PKHD1 GENE; PKHD1	P08F94	PKHD1	OMIM
BUDDING UNINHIBITED BY BENZIMIDAZOLES 1, S. CEREVISIAE, HOMOLOG OF, BETA; BUB1B	O60566	BUB1B	OMIM
E1A-BINDING PROTEIN, 300-KD; EP300	Q09472	EP300	OMIM
HEAT-SHOCK 105/110-KD PROTEIN 1; HSPH1	Q92598	HSPH1	OMIM
MUTATED IN COLORECTAL CANCERS; MCC	P23508	MCC	OMIM
V-MYC AVIAN MYELOCYTOMATOSIS VIRAL ONCOGENE HOMOLOG; MYC	P01106	MYC	OMIM
FOLLICULIN; FLCN	Q8NFG4	FLCN	OMIM
BCL2-ASSOCIATED X PROTEIN; BAX	Q07812	BAX	OMIM
MOTHERS AGAINST DECAPENTAPLEGIC, DROSOPHILA, HOMOLOG OF, 7; SMAD7	O15105	SMAD7	OMIM
N-ACETYLTRANSFERASE 2; NAT2	P11245	NAT2	OMIM
MUCIN 12; MUC12	Q9UKN1	MUC12	OMIM
MOTHERS AGAINST DECAPENTAPLEGIC, DROSOPHILA, HOMOLOG OF, 3; SMAD3	P84022	SMAD3	OMIM
SULFOTRANSFERASE FAMILY 1A, CYTOSOLIC, PHENOL-PREFERRING, MEMBER 1; SULT1A1	P50225	SULT1A1	OMIM
TRANSMEMBRANE PROTEIN WITH EGF-LIKE AND 2 FOLLISTATIN-LIKE DOMAINS 2; TMEFF2	Q9UIK5	TMEFF2	OMIM
RIBOSOMAL PROTEIN S20; RPS20	P60866	RPS2	OMIM
F-BOX AND WD40 DOMAIN PROTEIN 7; FBXW7	Q969H0	FBXW7	OMIM
PHOSPHOLIPASE A2, GROUP IIA; PLA2G2A	P14555	PLA2G2A	OMIM
PROTEIN-TYROSINE PHOSPHATASE, TYPE 4A, 3; PTP4A3	O75365	PTP4A3	OMIM
RECQ PROTEIN-LIKE 3; RECQL3	P54132	RECQL3	OMIM
MEX3, C. ELEGANS, HOMOLOG OF, C; MEX3C	Q5U5Q3	MEX3C	OMIM
ZINC FINGER PROTEIN 516; ZNF516	Q92618	ZNF516	OMIM
PHOSPHATIDYLINOSITOL GLYCAN ANCHOR BIOSYNTHESIS CLASS N PROTEIN; PIGN	O95427	PIGN	OMIM
TAR RNA-BINDING PROTEIN 2; TARBP2	Q15633	TARBP2	OMIM
TRANSMEMBRANE PROTEIN 8B; TMEM8B	A6NDV4	TMEM8B	OMIM
RHO GUANINE NUCLEOTIDE EXCHANGE FACTOR 12; ARHGEF12	Q9NZN5	ARHGEF12	OMIM
FIBROBLAST GROWTH FACTOR RECEPTOR 3; FGFR3	P22607	FGFR3	OMIM
MutS, E. COLI, HOMOLOG OF, 3; MSH3	P20585	MSH3	OMIM
EPHRIN RECEPTOR EphB2; EPHB2	P29323	EPHB2	OMIM
JAGGED 1; JAG1	P78504	JAG1	OMIM
BUDDING UNINHIBITED BY BENZIMIDAZOLES 3, S. CEREVISIAE, HOMOLOG OF; BUB3	O43684	BUB3	OMIM
PROGRAMMED CELL DEATH 4; PDCD4	Q53EL6	PDCD4	OMIM
TOLL-LIKE RECEPTOR 2; TLR2	O60603	TLR2	OMIM
PROTEIN-TYROSINE PHOSPHATASE, RECEPTOR-TYPE, H; PTPRH	Q9HD43	PTPRH	OMIM
CAUDAL-TYPE HOMEOBOX TRANSCRIPTION FACTOR 2; CDX2	Q99626	CDX2	OMIM
EPHRIN RECEPTOR EphB1; EPHB1	P54762	EPHB1	OMIM
COLCA1 GENE; COLCA1	Q6ZS62	COLCA1	OMIM
COLCA2 GENE; COLCA2	A8K830	COLCA2	OMIM
VTI1, S. CEREVISIAE, HOMOLOG OF, A; VTI1A	Q96AJ9	VTI1A	OMIM
FAMILY WITH SEQUENCE SIMILARITY 84, MEMBER A; FAM84A	Q96KN4	FAM84A	OMIM
COMPLEX IV, CYTOCHROME c OXIDASE SUBUNIT I; MTCO1	P00395	MTCO1	OMIM
INTERLEUKIN 17A; IL17A	Q16552	IL17A	OMIM
INTERLEUKIN 23-ALPHA; IL23A	Q9NPF7	IL23A	OMIM
RIBOSOMAL PROTEIN L5; RPL5	P46777	RPL5	OMIM
TRANSMEMBRANE PROTEIN 173; TMEM173	Q86WV6	TMEM173	OMIM
DNA METHYLTRANSFERASE 3B; DNMT3B	Q9UBC3	DNMT3B	OMIM
STRATIFIN; SFN	P31947	SFN	OMIM
BCL2-BINDING COMPONENT 3; BBC3	Q9BXH1	BBC3	OMIM
TOLL-LIKE RECEPTOR 4; TLR4	O00206	TLR4	OMIM
CHROMODOMAIN HELICASE DNA-BINDING PROTEIN 7; CHD7	Q9P2D1	CHD7	OMIM
AXIS INHIBITOR 1; AXIN1	O15169	AXIN1	OMIM
V-AKT MURINE THYMOMA VIRAL ONCOGENE HOMOLOG 1; AKT1	P31749	AKT1	OMIM
ADP-RIBOSYLATION FACTOR-LIKE 11; ARL11	Q969Q4	ARL11	OMIM
PROSTAGLANDIN-ENDOPEROXIDE SYNTHASE 2; PTGS2	P35354	PTGS2	OMIM
LAMININ, BETA-4; LAMB4	A4D0S4	LAMB4	OMIM
S100 CALCIUM-BINDING PROTEIN A11; S100A11	P31949	S100A11	OMIM
PLATELET-DERIVED GROWTH FACTOR RECEPTOR-LIKE; PDGFRL	Q15198	PDGFRL	OMIM
ENDONUCLEASE III-LIKE 1; NTHL1	P78549	NTHL1	OMIM
PROTEIN-TYROSINE PHOSPHATASE, NONRECEPTOR-TYPE, 14; PTPN14	Q15678	PTPN14	OMIM
PROTEIN-TYROSINE PHOSPHATASE, RECEPTOR-TYPE, F; PTPRF	P10586	PTPRF	OMIM
PROTEIN-TYROSINE PHOSPHATASE, NONRECEPTOR-TYPE, 13; PTPN13	Q12923	PTPN13	OMIM
PROTEIN-TYROSINE PHOSPHATASE, NONRECEPTOR-TYPE, 3; PTPN3	P26045	PTPN3	OMIM
REPRIMO; RPRM	Q9NS64	RPRM	OMIM
DELETED IN LIVER CANCER 1; DLC1	Q96QB1	DLC1	OMIM
PROTEIN-TYROSINE PHOSPHATASE, RECEPTOR-TYPE, T; PTPRT	O14522	PTPRT	OMIM
PROTEIN-TYROSINE PHOSPHATASE, RECEPTOR-TYPE, GAMMA; PTPRG	P23470	PTPRG	OMIM
CYTOCHROME b OF COMPLEX III; MTCYB	P00156	MTCYB	OMIM
5,10-METHYLENETETRAHYDROFOLATE REDUCTASE; MTHFR	P42898	MTHFR	OMIM
ZINC FINGER PROTEIN WITH KRAB AND SCAN DOMAINS 3; ZKSCAN3	Q9BRR0	ZKSCAN3	OMIM
CYCLIN-DEPENDENT KINASE 8; CDK8	P49336	CDK8	OMIM
AUTOPHAGY 2, S. CEREVISIAE, HOMOLOG OF, B; ATG2B	Q96BY7	ATG2B	OMIM
AUTOPHAGY 5, S. CEREVISIAE, HOMOLOG OF; ATG5	Q9H1Y0	ATG5	OMIM
AUTOPHAGY 9, S. CEREVISIAE, HOMOLOG OF, B; ATG9B	Q674R7	ATG9B	OMIM
MICROFIBRILLAR-ASSOCIATED PROTEIN 3-LIKE; MFAP3L	O75121	MFAP3L	OMIM
GLUTATHIONE S-TRANSFERASE, MU-1; GSTM1	P09488	GSTM1	OMIM
N-ACETYLTRANSFERASE 1; NAT1	P18440	NAT1	OMIM
UDP-N-ACETYL-ALPHA-D-GALACTOSAMINE:POLYPEPTIDE N-ACETYLGALACTOSAMINYLTRANSFERASE 12; GALNT12	Q8IXK2	GALNT12	OMIM
SEZ6-LIKE PROTEIN; SEZ6L	Q9BYH1	SEZ6L	OMIM
POLYMERASE II, RNA, SUBUNIT A; POLR2A	P24928	POLR2A	OMIM
RIBOSOMAL PROTEIN L21; RPL21	P46778	RPL21	OMIM
RIBOSOMAL PROTEIN L28; RPL28	P46779	RPL28	OMIM
RIBOSOMAL PROTEIN S10; RPS10	P46783	RPS10	OMIM
RIBOSOMAL PROTEIN S5; RPS5	P46782	RPS5	OMIM
RIBOSOMAL PROTEIN S9; RPS9	P46781	RPS9	OMIM
RIBOSOMAL PROTEIN L27a; RPL27A	P46776	RPL27A	OMIM
THYMIDYLATE SYNTHETASE; TYMS	P04818	TYMS	OMIM
RIBOSOMAL PROTEIN S29; RPS29	P62273	RPS29	OMIM
POSTMEIOTIC SEGREGATION INCREASED, S. CEREVISIAE, 1; PMS1	P54277	PMS1	OMIM
X-RAY RADIATION RESISTANCE-ASSOCIATED 1; XRRA1	Q6P2D8	XRRA1	OMIM
R-SPONDIN FAMILY, MEMBER 2; RSPO2	Q6UXX9	RSPO2	OMIM
TRANSLOCATOR PROTEIN, 18-KD; TSPO	P30536	TSPO	OMIM
CHEMOKINE, CXC MOTIF, LIGAND 10; CXCL10	P02778	CXCL10	OMIM
LATENT TRANSFORMING GROWTH FACTOR-BETA-BINDING PROTEIN 4; LTBP4	Q8N2S1	LTBP4	OMIM
POLYMERASE, DNA, IOTA; POLI	Q9UNA4	POLI	OMIM
PROTEIN-TYROSINE PHOSPHATASE, RECEPTOR-TYPE, KAPPA; PTPRK	Q15262	PTPRK	OMIM
DEAD BOX HELICASE 46; DDX46	Q7L014	DDX46	OMIM
BRCA2 GENE; BRCA2	P51587	BRCA2	OMIM
REPLICATION PROTEIN A1, 70-KD; RPA1	P27694	RPA1	OMIM
BREAST CANCER 1 GENE; BRCA1	P38398	BRCA1	OMIM
RING FINGER PROTEIN 26; RNF26	Q9BY78	RNF26	OMIM
CHECKPOINT PROTEIN WITH FHA AND RING FINGER DOMAINS; CHFR	Q96EP1	CHFR	OMIM
FAT TUMOR SUPPRESSOR, DROSOPHILA, HOMOLOG OF, 1; FAT1	Q14517	FAT1	OMIM
LEUCINE-RICH REPEAT-CONTAINING PROTEIN 16B; LRRC16B	Q8ND23	LRRC16B	OMIM
PEROXISOME PROLIFERATOR-ACTIVATED RECEPTOR-GAMMA; PPARG	P37231	PPARG	OMIM
REGENERATING ISLET-DERIVED FAMILY, MEMBER 4; REG4	Q9BYZ8	REG4	OMIM
METASTASIS-ASSOCIATED GENE IN COLON CANCER 1; MACC1	Q6ZN28	MACC1	OMIM
FANCA GENE; FANCA	O15360	FANCA	OMIM
SIRTUIN 6; SIRT6	Q8N6T7	SIRT6	OMIM
BETA-TRANSDUCIN REPEAT-CONTAINING PROTEIN; BTRC	Q9Y297	BTRC	OMIM
PERICENTRIOLAR MATERIAL 1; PCM1	Q15154	PCM1	OMIM
VITAMIN D RECEPTOR; VDR	P11473	VDR	OMIM
COMPLEX I, SUBUNIT ND4L; MTND4L	P03901	MTND4L	OMIM
COMPLEX I, SUBUNIT ND1; MTND1	P03886	MTND1	OMIM
COMPLEX IV, CYTOCHROME c OXIDASE SUBUNIT II; MTCO2	P00403	MTCO2	OMIM
EXONUCLEASE 1, S. CEREVISIAE, HOMOLOG OF; EXO1	Q9UQ84	EXO1	OMIM
TUMOR NECROSIS FACTOR LIGAND SUPERFAMILY, MEMBER 10; TNFSF10	P50591	TNFSF10	OMIM
Epidermal growth factor receptor	P00533	EGFR	TTD
Vascular endothelial growth factor A	P15692	VEGFA	TTD
Endosialin	Q9HCU0	CD248	TTD
Receptor-type tyrosine-protein kinase FLT3	P36888	FLT3	TTD
Protein kinase C gamma type	P05129	PRKCG	TTD
DNA topoisomerase I, mitochondrial	Q969P6	TOP1MT	TTD
cGMP-specific 3',5'-cyclic phosphodiesterase	O76074	PDE5A	TTD
Interferon alpha-2	P01563	IFNA2	TTD
Vascular endothelial growth factor receptor 2	P35968	KDR	TTD
Insulin-like growth factor 1 receptor	P08069	IGF1R	TTD
Coagulation factor VII	P08709	F7	TTD
Prostaglandin G/H synthase 1	P23219	PTGS1	TTD
Potassium-transporting ATPase alpha chain 1	P20648	ATP4A	TTD
Toll-like receptor 9	Q9NR96	TLR9	TTD
Transforming growth factor beta-2	P61812	TGFB2	TTD
Integrin alpha-V	P06756	ITGAV	TTD
Carcinoembryonic antigen-related cell adhesion molecule 5	P06731	CEACAM5	TTD
Angiopoietin-2	O15123	ANGPT2	TTD
DNA topoisomerase 1	P11387	TOP1	TTD
Tumor necrosis factor receptor superfamily member 10B	O14763	TNFRSF10B	TTD
Melanoma-associated antigen 3	P43357	MAGEA3	TTD
Fibronectin	P02751	FN1	TTD
E3 ubiquitin-protein ligase RNF43	Q68DV7	RNF43	TTD
RAF proto-oncogene serine/threonine-protein kinase	P04049	RAF1	TTD
Mucin-1	P15941	MUC1	TTD
Interleukin-21	Q9HBE4	IL21	TTD
Cellular tumor antigen p53	P04637	TP53	TTD
Vascular endothelial growth factor receptor 1	P17948	FLT1	TTD
Cell surface A33 antigen	Q99795	GPA33	TTD
T-cell surface glycoprotein CD3 gamma chain	P09693	CD3G	TTD
Epithelial cell adhesion molecule	P16422	EPCAM	TTD
Complement decay-accelerating factor	P08174	CD55	TTD
Matrix metalloproteinase-9	P14780	MMP9	TTD
Retinoic acid receptor alpha	P10276	RARA	TTD
Protein farnesyltransferase subunit beta	P49356	FNTB	TTD
Receptor tyrosine-protein kinase erbB-3	P21860	ERBB3	TTD
Receptor tyrosine-protein kinase erbB-2	P04626	ERBB2	TTD
Granulocyte-macrophage colony-stimulating factor	P04141	CSF2	TTD
RAC-gamma serine/threonine-protein kinase	Q9Y243	AKT3	TTD
Lysyl oxidase homolog 2	Q9Y4K0	LOXL2	TTD
GTPase NRas	P01111	NRAS	TTD
Proto-oncogene tyrosine-protein kinase receptor Ret	P07949	RET	TTD
Mast/stem cell growth factor receptor Kit	P10721	KIT	TTD
Vascular endothelial growth factor B	P49765	VEGFB	TTD
Placenta growth factor	P49763	PGF	TTD
Epidermal growth factor-like protein 7	Q9UHF1	EGFL7	TTD
Granulocyte-macrophage colony-stimulating factor receptor subunit alpha	P15509	CSF2RA	TTD
