# Supplementary material for: Exploring the Pharmacological Mechanism of the Herb Pair “HuangLian-GanJiang” against Colorectal Cancer Based on Network Pharmacology
Source: Evid Based Complement Alternat Med. 2019 Nov 29;2019:2735050. doi: 10.1155/2019/2735050 (PMC6906823; doi:10.1155/2019/2735050)
Supplement: Supplementary Materials — Table S1: chemical compounds of HL-GJ from TCMSP. Table S2: chemical compounds of HL-GJ from TCMID. Table S3: compounds in HL-GJ and corresponding targets. Table S4: CRC targets. Table S5: topological parameters for PPI Network. Table S6: topological parameters for compound nodes. Table S7: Gene Ontology (BP) biological process analysis. Table S8: Gene Ontology (MF) molecular function analysis. Table S9: pathway analysis. [file 2735050.f1.zip › 2735050.f1/Table S5.xlsx]

## Sheet: Sheet1
Table S5 Topological Parameters for PPI Network
Name	Attribute	Degree	BetweennessCentrality	ClosenessCentrality
HRAS	Associated Target	17	0.224877	0.644444
KRAS	Associated Target	17	0.224877	0.644444
PIK3CA	Associated Target	15	0.476683	0.659091
PDE5A	CRC target	10	0.533333	1
PPARG	CRC target	10	0.222063	1
KDR	CRC target	10	0.138424	0.483333
TGFBR1	Associated Target	10	0.114656	1
TGFBR2	CRC target	10	0.114656	1
EGFR	CRC target	10	0.0722496	0.557692
BRAF	CRC target	10	0.070936	0.460317
TGFB1	Associated Target	9	0.0257672	0.909091
NCOA1	Associated Target	9	0.0220635	0.909091
NCOA2	Associated Target	9	0.0220635	0.909091
PPARGC1A	Associated Target	9	0.0220635	0.909091
NRAS	Associated Target	9	0.00197044	0.453125
MAPK1	Associated Target	9	0.00197044	0.453125
VEGFA	Associated Target	8	0.0632184	0.467742
TGFB3	Associated Target	8	0.0188889	0.833333
ADIPOQ	Associated Target	8	0.0133333	0.833333
SMAD2	Associated Target	8	0.00687831	0.833333
SMAD3	Associated Target	8	0.00687831	0.833333
SMAD4	Associated Target	8	0.00687831	0.833333
SHC1	Associated Target	8	0.0045156	0.537037
GRB2	Associated Target	8	0.0045156	0.537037
EGF	Associated Target	8	0.0045156	0.537037
PTPN11	Associated Target	8	0.0045156	0.537037
FABP4	Associated Target	8	0.0031746	0.833333
NCOR1	Associated Target	8	0.0031746	0.833333
NCOR2	Associated Target	8	0.0031746	0.833333
MAP2K1	Associated Target	8	0	0.446154
MAP2K2	Associated Target	8	0	0.446154
RAP1A	Associated Target	8	0	0.446154
RAP1B	Associated Target	8	0	0.446154
SMAD7	Associated Target	7	0.0133333	0.769231
CD36	Associated Target	7	0	0.769231
ADCY5	Associated Target	7	0	0.769231
ADCY8	Associated Target	7	0	0.769231
ADCY6	Associated Target	7	0	0.769231
ADCY4	Associated Target	7	0	0.769231
ADCY7	Associated Target	7	0	0.769231
ADCY2	Associated Target	7	0	0.769231
ADCY3	Associated Target	7	0	0.769231
TGFB2	Associated Target	7	0	0.769231
CBL	Associated Target	6	0	0.446154
ACVRL1	Associated Target	5	0.0031746	0.666667
PIK3CB	Associated Target	5	0.00131363	0.446154
CRK	Associated Target	5	0.00123153	0.446154
VEGFC	Associated Target	5	0.00049261	0.446154
FIGF	Associated Target	5	0.00049261	0.446154
LEP	Associated Target	5	0	0.666667
PRKCA	Associated Target	5	0	0.426471
TP53	Associated Target	4	0.0135468	0.426471
FGF2	Associated Target	4	0	0.439394
TGFBR3	Associated Target	2	0	0.555556
TGFA	Associated Target	2	0	0.367089
NRP1	Associated Target	2	0	0.333333
NOS3	Associated Target	2	0	0.333333
NFKB1	Associated Target	1	0	0.526316
NPR2	Associated Target	1	0	0.526316
NPR1	Associated Target	1	0	0.526316
GUCY2C	Associated Target	1	0	0.526316
CDH5	Associated Target	1	0	0.329545
RIT1	Associated Target	1	0	0.318681
average		7.01587	0.0391413	0.634137
