# Supplementary material for: Exploring the Pharmacological Mechanism of the Herb Pair “HuangLian-GanJiang” against Colorectal Cancer Based on Network Pharmacology
Source: Evid Based Complement Alternat Med. 2019 Nov 29;2019:2735050. doi: 10.1155/2019/2735050 (PMC6906823; doi:10.1155/2019/2735050)
Supplement: Supplementary Materials — Table S1: chemical compounds of HL-GJ from TCMSP. Table S2: chemical compounds of HL-GJ from TCMID. Table S3: compounds in HL-GJ and corresponding targets. Table S4: CRC targets. Table S5: topological parameters for PPI Network. Table S6: topological parameters for compound nodes. Table S7: Gene Ontology (BP) biological process analysis. Table S8: Gene Ontology (MF) molecular function analysis. Table S9: pathway analysis. [file 2735050.f1.zip › 2735050.f1/Table S6.xlsx]

## Sheet: Sheet1
Table S6 Topological Parameters for Compound Nodes
Name	Attribute	Degree	BetweennessCentrality	ClosenessCentrality
gingerenone c	compound	4	0.0531264	0.39485
isogingerenone b	compound	4	0.0531264	0.39485
5,8-dihydroxy-2-(2-phenylethyl)chromone	compound	3	0.217488	0.336996
2,3,4-trihydroxy-benzenepropanoicacid	compound	3	0.0719886	0.355212
3,4-dihydroxyphenylethyl alcohol glucoside	compound	3	0.0719886	0.355212
3-carboxy-4-hydroxy-phenoxy glucoside	compound	3	0.0719886	0.355212
Moupinamide	compound	3	0.0377503	0.366534
obaculactone	compound	3	0.0306292	0.340741
5 ξ-hydroxy-1-(4-hydroxy-3,5-dimethoxy-phenyl)-7-(4-hydroxy-3-methoxyphenyl)-3-heptanone	compound	3	0.0261258	0.316151
10-gingerol	compound	3	0.0223807	0.334545
3,5-diacetoxy-1-(4-hydroxy-3,5-dimethoxy-phenyl)-7-(4-hydroxy-3-methoxyphenyl)heptane	compound	3	0.0223807	0.334545
[10]-gingerol	compound	3	0.0223807	0.334545
gingerol	compound	3	0.0141567	0.357977
columbianadin	compound	2	0.0176459	0.310811
palmidin a	compound	2	0.00463525	0.311864
Corchoroside A_qt	compound	2	0.00463525	0.311864
2-nonanol	compound	2	0.00447073	0.290221
linalool	compound	2	0.00447073	0.290221
8-gingerol	compound	2	0.00334792	0.307692
sexangularetin	compound	2	0.00334792	0.307692
[10]-gingerdione	compound	2	0.00334792	0.307692
[8]-gingerol	compound	2	0.00334792	0.307692
chlorogenic acid	compound	2	0.00278972	0.327402
ferulicacid	compound	2	0.00278972	0.327402
quercetin	compound	2	0.00278972	0.327402
ginketin	compound	2	0.00171803	0.257703
methyl hexadecanate	compound	2	0.00171803	0.257703
[(1S)-3-[(E)-but-2-enyl]-2-methyl-4-oxo-1-cyclopent-2-enyl] (1R,3R)-3-[(E)-3-methoxy-2-methyl-3-oxoprop-1-enyl]-2,2-dimethylcyclopropane-1-carboxylate	compound	2	0.00171803	0.257703
average		2.53571	0.0277958	0.32423
