# Supplementary material for: Exploring the Pharmacological Mechanism of the Herb Pair “HuangLian-GanJiang” against Colorectal Cancer Based on Network Pharmacology
Source: Evid Based Complement Alternat Med. 2019 Nov 29;2019:2735050. doi: 10.1155/2019/2735050 (PMC6906823; doi:10.1155/2019/2735050)
Supplement: Supplementary Materials — Table S1: chemical compounds of HL-GJ from TCMSP. Table S2: chemical compounds of HL-GJ from TCMID. Table S3: compounds in HL-GJ and corresponding targets. Table S4: CRC targets. Table S5: topological parameters for PPI Network. Table S6: topological parameters for compound nodes. Table S7: Gene Ontology (BP) biological process analysis. Table S8: Gene Ontology (MF) molecular function analysis. Table S9: pathway analysis. [file 2735050.f1.zip › 2735050.f1/Table S7.xlsx]

## Sheet: Sheet1
Table S7 Gene Ontology (BP) Biological Process analysis (p < 0.001)
GO-ID	CorrP-Val	Description	Genes
23033	8e-30	signaling pathway	ACVRL1 PIK3CB FGF2 KDR CD36 HRAS NCOA2 MAP2K1 MAP2K2 ADIPOQ PRKCA TGFBR1 TGFBR2 TGFBR3 PIK3CA TP53 GUCY2C FIGF NPR1 SHC1 NPR2 ADCY4 ADCY3 TGFA ADCY2 ADCY8 CBL ADCY7 EGFR ADCY6 ADCY5 RAP1B NRAS RAP1A MAPK1 SMAD2 SMAD4 TGFB2 TGFB1 SMAD3 NOS3 EGF TGFB3 BRAF PTPN11 SMAD7 RIT1 LEP KRAS GRB2
23052	5.96e-29	signaling	ACVRL1 NRP1 PIK3CB FGF2 KDR CD36 HRAS NCOA2 MAP2K1 MAP2K2 ADIPOQ PRKCA TGFBR1 TGFBR2 TGFBR3 PIK3CA PPARG PDE5A CRK TP53 GUCY2C FIGF NPR1 SHC1 NPR2 ADCY4 ADCY3 TGFA ADCY2 ADCY8 CBL ADCY7 EGFR ADCY6 ADCY5 RAP1B NRAS RAP1A MAPK1 SMAD2 SMAD4 TGFB2 TGFB1 SMAD3 NOS3 EGF TGFB3 BRAF PTPN11 NFKB1 SMAD7 RIT1 LEP KRAS GRB2
7165	3.44e-24	signal transduction	ACVRL1 NRP1 SHC1 NPR2 ADCY4 ADCY3 TGFA ADCY2 PIK3CB ADCY8 FGF2 ADCY7 EGFR ADCY6 ADCY5 RAP1B NRAS RAP1A MAPK1 CD36 HRAS MAP2K1 SMAD4 MAP2K2 TGFB1 NOS3 EGF TGFB3 ADIPOQ PRKCA BRAF PTPN11 TGFBR1 NFKB1 TGFBR3 RIT1 PIK3CA LEP PPARG PDE5A KRAS GRB2 CRK TP53
23060	4.07e-23	signal transmission	ACVRL1 NRP1 SHC1 NPR2 ADCY4 ADCY3 TGFA ADCY2 PIK3CB ADCY8 FGF2 ADCY7 EGFR ADCY6 ADCY5 RAP1B NRAS RAP1A MAPK1 CD36 HRAS SMAD2 MAP2K1 SMAD4 MAP2K2 TGFB1 NOS3 EGF TGFB3 ADIPOQ PRKCA BRAF PTPN11 TGFBR1 NFKB1 TGFBR3 RIT1 PIK3CA LEP PPARG PDE5A KRAS GRB2 CRK TP53
23046	4.07e-23	signaling process	ACVRL1 NRP1 SHC1 NPR2 ADCY4 ADCY3 TGFA ADCY2 PIK3CB ADCY8 FGF2 ADCY7 EGFR ADCY6 ADCY5 RAP1B NRAS RAP1A MAPK1 CD36 HRAS SMAD2 MAP2K1 SMAD4 MAP2K2 TGFB1 NOS3 EGF TGFB3 ADIPOQ PRKCA BRAF PTPN11 TGFBR1 NFKB1 TGFBR3 RIT1 PIK3CA LEP PPARG PDE5A KRAS GRB2 CRK TP53
42325	1.36e-22	regulation of phosphorylation	SHC1 NPR2 ADCY4 ADCY3 TGFA ADCY2 PIK3CB ADCY8 FGF2 ADCY7 EGFR ADCY6 ADCY5 MAP2K1 SMAD4 TGFB2 TGFB1 SMAD3 EGF TGFB3 ADIPOQ PRKCA PTPN11 TGFBR1 TGFBR2 SMAD7 FABP4 KRAS
23034	1.86e-22	intracellular signaling pathway	GUCY2C NPR1 SHC1 ADCY4 ADCY3 TGFA ADCY2 PIK3CB ADCY8 FGF2 ADCY7 EGFR ADCY6 ADCY5 RAP1B NRAS RAP1A MAPK1 CD36 HRAS SMAD2 NCOA2 MAP2K1 MAP2K2 EGF TGFB3 PRKCA BRAF PTPN11 TGFBR1 TGFBR3 RIT1 PIK3CA KRAS GRB2 TP53
7166	2.85e-22	cell surface receptor linked signaling pathway	ACVRL1 GUCY2C FIGF NPR1 SHC1 NPR2 ADCY4 ADCY3 ADCY2 PIK3CB ADCY8 CBL FGF2 ADCY7 EGFR ADCY6 ADCY5 KDR MAPK1 HRAS SMAD2 SMAD4 TGFB2 TGFB1 SMAD3 NOS3 EGF TGFB3 ADIPOQ PTPN11 TGFBR1 TGFBR2 SMAD7 TGFBR3 LEP KRAS GRB2
19220	2.85e-22	regulation of phosphate metabolic process	SHC1 NPR2 ADCY4 ADCY3 TGFA ADCY2 PIK3CB ADCY8 FGF2 ADCY7 EGFR ADCY6 ADCY5 MAP2K1 SMAD4 TGFB2 TGFB1 SMAD3 EGF TGFB3 ADIPOQ PRKCA PTPN11 TGFBR1 TGFBR2 SMAD7 FABP4 KRAS
51174	2.85e-22	regulation of phosphorus metabolic process	SHC1 NPR2 ADCY4 ADCY3 TGFA ADCY2 PIK3CB ADCY8 FGF2 ADCY7 EGFR ADCY6 ADCY5 MAP2K1 SMAD4 TGFB2 TGFB1 SMAD3 EGF TGFB3 ADIPOQ PRKCA PTPN11 TGFBR1 TGFBR2 SMAD7 FABP4 KRAS
35556	3.14e-22	intracellular signal transduction	SHC1 ADCY4 ADCY3 TGFA ADCY2 PIK3CB ADCY8 FGF2 ADCY7 EGFR ADCY6 ADCY5 RAP1B NRAS RAP1A MAPK1 CD36 HRAS MAP2K1 MAP2K2 EGF TGFB3 PRKCA BRAF PTPN11 TGFBR1 TGFBR3 RIT1 PIK3CA KRAS GRB2 TP53
9725	6.23e-22	response to hormone stimulus	SHC1 ADCY4 ADCY3 ADCY2 ADCY8 ADCY7 ADCY6 ADCY5 MAPK1 MAP2K1 TGFB2 TGFB1 NOS3 TGFB3 ADIPOQ PRKCA BRAF PTPN11 TGFBR1 TGFBR3 FABP4 LEP PPARG PDE5A KRAS GRB2
51338	1.16e-21	regulation of transferase activity	SHC1 NPR2 ADCY4 ADCY3 TGFA ADCY2 PIK3CB ADCY8 FGF2 ADCY7 EGFR ADCY6 ADCY5 MAP2K1 TGFB2 TGFB1 EGF TGFB3 PRKCA PTPN11 TGFBR1 TGFBR2 FABP4 PPARG KRAS
45860	6.18e-21	positive regulation of protein kinase activity	MAP2K1 TGFB2 TGFB1 SHC1 EGF TGFB3 ADCY4 ADCY3 TGFA ADCY2 PTPN11 PIK3CB ADCY8 FGF2 ADCY7 TGFBR1 EGFR ADCY6 TGFBR2 ADCY5 KRAS
42127	7.83e-21	regulation of cell proliferation	ACVRL1 GUCY2C NRP1 FIGF SHC1 TGFA FGF2 EGFR CDH5 NRAS KDR MAPK1 HRAS SMAD2 MAP2K1 SMAD4 TGFB2 TGFB1 SMAD3 NOS3 EGF TGFB3 PRKCA TGFBR1 TGFBR2 TGFBR3 RIT1 FABP4 PPARG KRAS TP53
9719	8.16e-21	response to endogenous stimulus	SHC1 ADCY4 ADCY3 ADCY2 ADCY8 ADCY7 ADCY6 ADCY5 MAPK1 MAP2K1 TGFB2 TGFB1 NOS3 TGFB3 ADIPOQ PRKCA BRAF PTPN11 TGFBR1 TGFBR3 FABP4 LEP PPARG PDE5A KRAS GRB2
43549	9.41e-21	regulation of kinase activity	MAP2K1 TGFB2 TGFB1 SHC1 EGF TGFB3 NPR2 ADCY4 ADCY3 TGFA PRKCA ADCY2 PTPN11 PIK3CB ADCY8 FGF2 ADCY7 TGFBR1 EGFR ADCY6 TGFBR2 ADCY5 FABP4 KRAS
33674	1.07e-20	positive regulation of kinase activity	MAP2K1 TGFB2 TGFB1 SHC1 EGF TGFB3 ADCY4 ADCY3 TGFA ADCY2 PTPN11 PIK3CB ADCY8 FGF2 ADCY7 TGFBR1 EGFR ADCY6 TGFBR2 ADCY5 KRAS
51347	2.07e-20	positive regulation of transferase activity	ACVRL1 GUCY2C SMAD2 FIGF SMAD4 TGFB2 TGFB1 SMAD3 NPR1 SHC1 EGF TGFB3 NPR2 PTPN11 CBL FGF2 TGFBR1 EGFR TGFBR2 SMAD7 TGFBR3 KDR GRB2
7167	2.07e-20	enzyme linked receptor protein signaling pathway	MAP2K1 TGFB2 TGFB1 SHC1 EGF TGFB3 ADCY4 ADCY3 TGFA ADCY2 PTPN11 PIK3CB ADCY8 FGF2 ADCY7 TGFBR1 EGFR ADCY6 TGFBR2 ADCY5 KRAS
50794	3.6e-20	regulation of cellular process	ACVRL1 NRP1 PIK3CB FGF2 CDH5 KDR CD36 HRAS NCOA2 MAP2K1 MAP2K2 ADIPOQ PRKCA TGFBR1 TGFBR2 NCOR2 TGFBR3 NCOR1 PIK3CA PPARG PDE5A CRK TP53 GUCY2C FIGF NPR1 SHC1 NPR2 ADCY4 ADCY3 TGFA ADCY2 ADCY8 CBL ADCY7 EGFR ADCY6 ADCY5 RAP1B NRAS RAP1A MAPK1 SMAD2 SMAD4 TGFB2 TGFB1 SMAD3 NOS3 EGF TGFB3 BRAF PTPN11 NFKB1 SMAD7 RIT1 FABP4 LEP KRAS GRB2
45859	8.03e-20	regulation of protein kinase activity	MAP2K1 TGFB2 TGFB1 SHC1 EGF TGFB3 ADCY4 ADCY3 TGFA PRKCA ADCY2 PTPN11 PIK3CB ADCY8 FGF2 ADCY7 TGFBR1 EGFR ADCY6 TGFBR2 ADCY5 FABP4 KRAS
42221	1.76e-19	response to chemical stimulus	SHC1 ADCY4 ADCY3 ADCY2 ADCY8 ADCY7 EGFR ADCY6 ADCY5 MAPK1 SMAD2 MAP2K1 TGFB2 TGFB1 SMAD3 NOS3 TGFB3 ADIPOQ PRKCA BRAF PTPN11 TGFBR1 TGFBR2 TGFBR3 FABP4 LEP PPARG PDE5A KRAS GRB2
10033	1.76e-19	response to organic substance	GUCY2C SHC1 ADCY4 ADCY3 ADCY2 PIK3CB ADCY8 FGF2 ADCY7 EGFR ADCY6 ADCY5 MAPK1 HRAS SMAD2 MAP2K1 SMAD4 TGFB2 TGFB1 SMAD3 NOS3 TGFB3 ADIPOQ PRKCA BRAF PTPN11 TGFBR1 TGFBR2 TGFBR3 FABP4 LEP PPARG PDE5A KRAS GRB2 TP53
65009	2.48e-19	regulation of molecular function	SHC1 NPR2 ADCY4 ADCY3 TGFA ADCY2 PIK3CB ADCY8 FGF2 ADCY7 EGFR ADCY6 ADCY5 SMAD2 MAP2K1 SMAD4 TGFB2 TGFB1 SMAD3 NOS3 EGF TGFB3 PRKCA PTPN11 TGFBR1 NFKB1 TGFBR2 SMAD7 FABP4 PPARG KRAS TP53
50790	5.48e-19	regulation of catalytic activity	SHC1 NPR2 ADCY4 ADCY3 TGFA ADCY2 PIK3CB ADCY8 FGF2 ADCY7 EGFR ADCY6 ADCY5 MAP2K1 TGFB2 TGFB1 SMAD3 NOS3 EGF TGFB3 PRKCA PTPN11 TGFBR1 NFKB1 TGFBR2 SMAD7 FABP4 PPARG KRAS TP53
50789	6.01e-19	regulation of biological process	ACVRL1 NRP1 PIK3CB FGF2 CDH5 KDR CD36 HRAS NCOA2 MAP2K1 MAP2K2 ADIPOQ PRKCA TGFBR1 TGFBR2 NCOR2 TGFBR3 NCOR1 PIK3CA PPARG PDE5A CRK TP53 GUCY2C FIGF NPR1 SHC1 NPR2 ADCY4 ADCY3 TGFA ADCY2 ADCY8 CBL ADCY7 EGFR ADCY6 ADCY5 RAP1B NRAS RAP1A MAPK1 SMAD2 SMAD4 TGFB2 TGFB1 SMAD3 NOS3 EGF TGFB3 BRAF PTPN11 NFKB1 SMAD7 RIT1 FABP4 LEP KRAS GRB2
43085	1.73e-18	positive regulation of catalytic activity	SHC1 ADCY4 ADCY3 TGFA ADCY2 PIK3CB ADCY8 FGF2 ADCY7 EGFR ADCY6 ADCY5 MAP2K1 TGFB2 TGFB1 SMAD3 NOS3 EGF TGFB3 PTPN11 TGFBR1 TGFBR2 PPARG KRAS TP53
6468	6.39e-18	protein amino acid phosphorylation	ACVRL1 GUCY2C NPR1 SHC1 NPR2 TGFA PIK3CB FGF2 EGFR KDR MAPK1 SMAD2 MAP2K1 TGFB2 MAP2K2 TGFB1 EGF TGFB3 PRKCA BRAF PTPN11 TGFBR1 TGFBR2 SMAD7 TGFBR3 PIK3CA
65007	1.65e-17	biological regulation	ACVRL1 NRP1 PIK3CB FGF2 CDH5 KDR CD36 HRAS NCOA2 MAP2K1 MAP2K2 ADIPOQ PRKCA TGFBR1 TGFBR2 NCOR2 TGFBR3 NCOR1 PIK3CA PPARG PDE5A CRK TP53 GUCY2C FIGF NPR1 SHC1 NPR2 ADCY4 ADCY3 TGFA ADCY2 ADCY8 CBL ADCY7 EGFR ADCY6 ADCY5 RAP1B NRAS RAP1A MAPK1 SMAD2 SMAD4 TGFB2 TGFB1 SMAD3 NOS3 EGF TGFB3 BRAF PTPN11 NFKB1 SMAD7 RIT1 FABP4 LEP KRAS GRB2
48522	4.18e-17	positive regulation of cellular process	ACVRL1 NRP1 FIGF NPR1 SHC1 TGFA CBL FGF2 ADCY7 EGFR NRAS KDR MAPK1 CD36 HRAS SMAD2 MAP2K1 SMAD4 TGFB2 TGFB1 SMAD3 EGF TGFB3 ADIPOQ PRKCA BRAF PTPN11 TGFBR1 NFKB1 TGFBR2 SMAD7 RIT1 FABP4 LEP PPARG PDE5A KRAS TP53
44093	4.74e-17	positive regulation of molecular function	SHC1 ADCY4 ADCY3 TGFA ADCY2 PIK3CB ADCY8 FGF2 ADCY7 EGFR ADCY6 ADCY5 MAP2K1 TGFB2 TGFB1 SMAD3 NOS3 EGF TGFB3 PTPN11 TGFBR1 TGFBR2 PPARG KRAS TP53
32879	6.96e-17	regulation of localization	ACVRL1 NRP1 FIGF CBL FGF2 EGFR KDR MAPK1 CD36 MAP2K1 SMAD4 TGFB2 TGFB1 SMAD3 NOS3 EGF TGFB3 ADIPOQ PRKCA PTPN11 TGFBR1 NFKB1 SMAD7 TGFBR3 LEP PPARG
48518	1.07e-16	positive regulation of biological process	ACVRL1 NRP1 FIGF NPR1 SHC1 TGFA CBL FGF2 ADCY7 EGFR NRAS KDR MAPK1 CD36 HRAS SMAD2 MAP2K1 SMAD4 TGFB2 TGFB1 SMAD3 NOS3 EGF TGFB3 ADIPOQ PRKCA BRAF PTPN11 TGFBR1 NFKB1 TGFBR2 SMAD7 RIT1 FABP4 LEP PPARG PDE5A KRAS TP53
9653	1.4e-16	anatomical structure morphogenesis	ACVRL1 NRP1 FIGF NPR1 FGF2 EGFR KDR MAPK1 HRAS SMAD2 MAP2K1 SMAD4 TGFB2 TGFB1 SMAD3 NOS3 EGF TGFB3 PRKCA BRAF PTPN11 TGFBR1 TGFBR2 SMAD7 NCOR2 TGFBR3 RIT1 PPARG PDE5A GRB2 TP53
16310	4.38e-16	phosphorylation	ACVRL1 GUCY2C NPR1 SHC1 NPR2 TGFA PIK3CB FGF2 EGFR KDR MAPK1 SMAD2 MAP2K1 TGFB2 MAP2K2 TGFB1 EGF TGFB3 PRKCA BRAF PTPN11 TGFBR1 TGFBR2 SMAD7 TGFBR3 PIK3CA
35466	1.18e-15	regulation of signaling pathway	ACVRL1 SHC1 TGFA PIK3CB FGF2 EGFR NRAS HRAS SMAD2 MAP2K1 SMAD4 TGFB2 TGFB1 SMAD3 EGF TGFB3 ADIPOQ PRKCA BRAF PTPN11 TGFBR1 SMAD7 NCOR1 LEP KRAS GRB2 CRK TP53
50793	6.36e-15	regulation of developmental process	NRP1 NPR1 FGF2 KDR MAPK1 CD36 SMAD2 MAP2K1 SMAD4 TGFB2 TGFB1 SMAD3 NOS3 EGF TGFB3 ADIPOQ PRKCA TGFBR1 NFKB1 TGFBR2 SMAD7 NCOR2 LEP PPARG TP53
6793	3.87e-14	phosphorus metabolic process	ACVRL1 GUCY2C NPR1 SHC1 NPR2 TGFA PIK3CB FGF2 EGFR KDR MAPK1 SMAD2 MAP2K1 TGFB2 MAP2K2 TGFB1 EGF TGFB3 PRKCA BRAF PTPN11 TGFBR1 TGFBR2 SMAD7 TGFBR3 PIK3CA
6796	3.87e-14	phosphate metabolic process	ACVRL1 GUCY2C NPR1 SHC1 NPR2 TGFA PIK3CB FGF2 EGFR KDR MAPK1 SMAD2 MAP2K1 TGFB2 MAP2K2 TGFB1 EGF TGFB3 PRKCA BRAF PTPN11 TGFBR1 TGFBR2 SMAD7 TGFBR3 PIK3CA
51239	5.84e-14	regulation of multicellular organismal process	NRP1 NPR1 FGF2 EGFR NRAS HRAS SMAD2 MAP2K1 SMAD4 TGFB2 TGFB1 SMAD3 NOS3 EGF TGFB3 ADIPOQ PRKCA PTPN11 TGFBR1 TGFBR2 SMAD7 PIK3CA LEP PPARG PDE5A KRAS TP53
32147	8.78e-14	activation of protein kinase activity	TGFB2 EGF ADCY4 ADCY3 ADCY2 ADCY8 FGF2 ADCY7 TGFBR1 EGFR ADCY6 TGFBR2 ADCY5
48519	3.56e-13	negative regulation of biological process	ACVRL1 NRP1 NPR1 FGF2 EGFR CDH5 NRAS MAPK1 HRAS SMAD2 MAP2K1 SMAD4 TGFB2 TGFB1 SMAD3 NOS3 EGF TGFB3 ADIPOQ PRKCA BRAF PTPN11 TGFBR1 NFKB1 SMAD7 NCOR2 TGFBR3 RIT1 NCOR1 PIK3CA LEP PPARG KRAS TP53
10646	3.87e-13	regulation of cell communication	ACVRL1 SHC1 TGFA PIK3CB FGF2 EGFR NRAS HRAS MAP2K1 SMAD4 TGFB2 TGFB1 SMAD3 EGF TGFB3 ADIPOQ PRKCA BRAF PTPN11 TGFBR1 SMAD7 NCOR1 LEP KRAS GRB2 CRK TP53
165	7.66e-13	MAPKKK cascade	MAP2K1 MAP2K2 SHC1 EGF TGFB3 TGFA PRKCA BRAF PTPN11 PIK3CB FGF2 TGFBR1 EGFR MAPK1
65008	8e-13	regulation of biological quality	ACVRL1 NRP1 NPR1 NPR2 PIK3CB FGF2 NRAS KDR CD36 HRAS SMAD2 SMAD4 TGFB2 TGFB1 SMAD3 NOS3 TGFB3 ADIPOQ PRKCA PTPN11 TGFBR1 SMAD7 NCOR2 TGFBR3 FABP4 LEP PPARG PDE5A KRAS TP53
7179	9.75e-13	transforming growth factor beta receptor signaling pathway	ACVRL1 TGFBR3 SMAD2 SMAD4 TGFB2 TGFB1 SMAD3 TGFB3 TGFBR1 TGFBR2
45595	1.06e-12	regulation of cell differentiation	SMAD2 NRP1 MAP2K1 SMAD4 TGFB2 TGFB1 SMAD3 TGFB3 ADIPOQ FGF2 TGFBR1 NFKB1 TGFBR2 SMAD7 NCOR2 LEP MAPK1 PPARG CD36 TP53
10647	1.16e-12	positive regulation of cell communication	ACVRL1 SMAD4 TGFB2 TGFB1 SMAD3 EGF TGFB3 ADIPOQ TGFA BRAF PTPN11 FGF2 TGFBR1 EGFR NRAS LEP KRAS HRAS
48523	1.45e-12	negative regulation of cellular process	ACVRL1 NRP1 NPR1 FGF2 EGFR CDH5 NRAS MAPK1 HRAS SMAD2 MAP2K1 SMAD4 TGFB2 TGFB1 SMAD3 NOS3 TGFB3 ADIPOQ PRKCA BRAF PTPN11 TGFBR1 NFKB1 SMAD7 NCOR2 TGFBR3 RIT1 NCOR1 PIK3CA PPARG KRAS TP53
43086	1.73e-12	negative regulation of catalytic activity	TGFB2 NOS3 NPR2 ADCY4 ADCY3 PRKCA ADCY2 ADCY8 ADCY7 ADCY6 NFKB1 ADCY5 SMAD7 FABP4 PPARG TP53
10717	1.75e-12	regulation of epithelial to mesenchymal transition	SMAD2 SMAD4 TGFB2 TGFB1 SMAD3 TGFB3 SMAD7
31323	2.66e-12	regulation of cellular metabolic process	ACVRL1 NPR1 SHC1 NPR2 ADCY4 ADCY3 TGFA ADCY2 PIK3CB ADCY8 FGF2 ADCY7 EGFR ADCY6 ADCY5 MAPK1 HRAS SMAD2 NCOA2 MAP2K1 SMAD4 TGFB2 TGFB1 SMAD3 NOS3 EGF TGFB3 ADIPOQ PRKCA PTPN11 TGFBR1 NFKB1 TGFBR2 SMAD7 NCOR2 RIT1 NCOR1 FABP4 LEP PPARG KRAS CRK TP53
43687	3.04e-12	post-translational protein modification	ACVRL1 GUCY2C NPR1 SHC1 NPR2 TGFA PIK3CB CBL FGF2 EGFR KDR MAPK1 SMAD2 MAP2K1 TGFB2 MAP2K2 TGFB1 EGF TGFB3 PRKCA BRAF PTPN11 TGFBR1 TGFBR2 SMAD7 TGFBR3 PIK3CA
33160	3.09e-12	positive regulation of protein import into nucleus, translocation	SMAD4 TGFB1 SMAD3 EGF TGFB3 TGFBR1 EGFR
8285	3.79e-12	negative regulation of cell proliferation	ACVRL1 SMAD2 MAP2K1 SMAD4 TGFB2 TGFB1 SMAD3 NOS3 TGFB3 PRKCA FGF2 TGFBR3 CDH5 RIT1 PPARG HRAS TP53
35468	3.89e-12	positive regulation of signaling pathway	ACVRL1 SMAD4 TGFB2 TGFB1 SMAD3 EGF TGFB3 ADIPOQ TGFA BRAF FGF2 TGFBR1 EGFR NRAS LEP KRAS HRAS
10941	4.38e-12	regulation of cell death	MAP2K1 TGFB2 TGFB1 SHC1 EGF TGFB3 ADIPOQ TGFA PRKCA BRAF PTPN11 PIK3CB FGF2 TGFBR1 EGFR NRAS NCOR1 LEP KRAS GRB2 HRAS CRK
9966	4.38e-12	regulation of signal transduction	NRP1 SMAD4 TGFB2 TGFB1 SMAD3 NOS3 TGFB3 ADIPOQ PRKCA BRAF FGF2 TGFBR1 EGFR NFKB1 NRAS RIT1 PIK3CA MAPK1 PPARG PDE5A KRAS HRAS TP53
23051	4.83e-12	regulation of signaling process	MAP2K1 TGFB2 TGFB1 SHC1 EGF TGFB3 ADIPOQ TGFA PRKCA BRAF PTPN11 PIK3CB FGF2 TGFBR1 EGFR NRAS NCOR1 LEP KRAS GRB2 HRAS CRK
8284	5.7e-12	positive regulation of cell proliferation	NRP1 FIGF TGFB2 TGFB1 SHC1 EGF TGFA PRKCA FGF2 TGFBR1 EGFR TGFBR2 NRAS FABP4 KDR MAPK1 KRAS HRAS
50896	6.04e-12	response to stimulus	ACVRL1 GUCY2C NRP1 SHC1 ADCY4 ADCY3 ADCY2 PIK3CB ADCY8 FGF2 ADCY7 EGFR ADCY6 ADCY5 NRAS MAPK1 CD36 HRAS SMAD2 MAP2K1 SMAD4 TGFB2 TGFB1 SMAD3 NOS3 TGFB3 ADIPOQ PRKCA BRAF PTPN11 TGFBR1 NFKB1 TGFBR2 SMAD7 TGFBR3 FABP4 LEP PPARG PDE5A KRAS GRB2 TP53
34199	8.09e-12	activation of protein kinase A activity	ADCY4 ADCY3 ADCY2 ADCY8 ADCY7 ADCY6 ADCY5
9893	1.29e-11	positive regulation of metabolic process	ACVRL1 SMAD2 MAP2K1 SMAD4 TGFB2 TGFB1 SMAD3 NPR1 SHC1 EGF TGFB3 ADIPOQ PRKCA FGF2 ADCY7 TGFBR1 EGFR NFKB1 SMAD7 RIT1 MAPK1 PPARG HRAS TP53
19222	1.29e-11	regulation of metabolic process	SMAD2 NRP1 MAP2K1 SMAD4 TGFB2 TGFB1 SMAD3 NOS3 TGFB3 PRKCA FGF2 NFKB1 TGFBR2 LEP PPARG CD36
51094	1.29e-11	positive regulation of developmental process	ACVRL1 NPR1 SHC1 NPR2 ADCY4 ADCY3 TGFA ADCY2 PIK3CB ADCY8 FGF2 ADCY7 EGFR ADCY6 ADCY5 MAPK1 HRAS SMAD2 NCOA2 MAP2K1 SMAD4 TGFB2 TGFB1 SMAD3 NOS3 EGF TGFB3 ADIPOQ PRKCA PTPN11 TGFBR1 NFKB1 TGFBR2 SMAD7 NCOR2 RIT1 NCOR1 FABP4 LEP PPARG KRAS CRK TP53
7178	1.58e-11	transmembrane receptor protein serine/threonine kinase signaling pathway	MAP2K1 TGFB1 SHC1 EGF TGFB3 TGFA PTPN11 KRAS PIK3CB FGF2 EGFR
43406	1.58e-11	positive regulation of MAP kinase activity	ACVRL1 TGFBR3 SMAD2 SMAD4 TGFB2 TGFB1 SMAD3 TGFB3 TGFBR1 TGFBR2 SMAD7
48856	1.67e-11	anatomical structure development	ACVRL1 NRP1 FIGF NPR1 NPR2 FGF2 EGFR CDH5 NRAS KDR MAPK1 HRAS SMAD2 MAP2K1 SMAD4 TGFB2 TGFB1 SMAD3 NOS3 EGF TGFB3 PRKCA BRAF PTPN11 TGFBR1 TGFBR2 SMAD7 NCOR2 TGFBR3 RIT1 LEP PPARG PDE5A KRAS GRB2 TP53
51270	1.67e-11	regulation of cellular component movement	SMAD2 TGFB1 SMAD3 SHC1 ADCY4 ADCY3 ADCY2 PTPN11 ADCY8 ADCY7 ADCY6 ADCY5 PPARG GRB2
71310	1.67e-11	cellular response to organic substance	ACVRL1 NRP1 MAP2K1 FIGF TGFB2 TGFB1 SMAD3 FGF2 TGFBR1 EGFR SMAD7 TGFBR3 KDR MAPK1
35295	1.9e-11	tube development	SMAD2 NRP1 SMAD4 TGFB1 SMAD3 NPR1 NOS3 EGF TGFB3 FGF2 TGFBR1 TGFBR2 SMAD7 KDR PDE5A
23014	2.26e-11	signal transmission via phosphorylation event	MAP2K1 MAP2K2 SHC1 EGF TGFB3 TGFA PRKCA BRAF PTPN11 PIK3CB FGF2 TGFBR1 EGFR TGFBR3 PIK3CA MAPK1
7243	2.26e-11	intracellular protein kinase cascade	MAP2K1 MAP2K2 SHC1 EGF TGFB3 TGFA PRKCA BRAF PTPN11 PIK3CB FGF2 TGFBR1 EGFR TGFBR3 PIK3CA MAPK1
43405	2.5e-11	regulation of MAP kinase activity	MAP2K1 TGFB1 SHC1 EGF TGFB3 TGFA PRKCA PTPN11 KRAS PIK3CB FGF2 EGFR
48513	2.61e-11	organ development	ACVRL1 NRP1 FIGF FGF2 EGFR CDH5 KDR MAPK1 HRAS SMAD2 MAP2K1 SMAD4 TGFB2 TGFB1 SMAD3 NOS3 EGF TGFB3 PRKCA BRAF TGFBR1 TGFBR2 SMAD7 NCOR2 TGFBR3 RIT1 LEP PPARG GRB2 TP53
33158	2.61e-11	regulation of protein import into nucleus, translocation	SMAD4 TGFB1 SMAD3 EGF TGFB3 TGFBR1 EGFR
32502	2.72e-11	developmental process	ACVRL1 NRP1 FIGF NPR1 NPR2 PIK3CB FGF2 EGFR CDH5 NRAS KDR MAPK1 HRAS SMAD2 MAP2K1 SMAD4 TGFB2 TGFB1 SMAD3 NOS3 EGF TGFB3 ADIPOQ PRKCA BRAF PTPN11 TGFBR1 TGFBR2 SMAD7 NCOR2 TGFBR3 RIT1 FABP4 LEP PPARG PDE5A KRAS GRB2 TP53
43067	2.77e-11	regulation of programmed cell death	NRP1 TGFB2 TGFB1 SMAD3 NOS3 TGFB3 ADIPOQ PRKCA BRAF FGF2 TGFBR1 EGFR NFKB1 NRAS RIT1 PIK3CA MAPK1 PPARG PDE5A KRAS HRAS TP53
31325	3.11e-11	positive regulation of cellular metabolic process	ACVRL1 SMAD2 MAP2K1 SMAD4 TGFB1 SMAD3 NPR1 SHC1 EGF TGFB3 ADIPOQ PRKCA FGF2 ADCY7 TGFBR1 EGFR NFKB1 SMAD7 RIT1 MAPK1 PPARG HRAS TP53
44092	3.26e-11	negative regulation of molecular function	TGFB2 NOS3 NPR2 ADCY4 ADCY3 PRKCA ADCY2 ADCY8 ADCY7 ADCY6 NFKB1 ADCY5 SMAD7 FABP4 PPARG TP53
10770	4e-11	positive regulation of cell morphogenesis involved in differentiation	SMAD2 SMAD4 TGFB2 TGFB1 SMAD3 TGFB3
10718	4e-11	positive regulation of epithelial to mesenchymal transition	SMAD2 SMAD4 TGFB2 TGFB1 SMAD3 TGFB3
90066	4.18e-11	regulation of anatomical structure size	ACVRL1 NRP1 SMAD4 TGFB2 TGFB1 SMAD3 NPR1 NOS3 TGFB3 FGF2 TGFBR1 TGFBR3 PPARG PDE5A TP53
32870	4.4e-11	cellular response to hormone stimulus	TGFB1 SHC1 ADCY4 ADCY3 PPARG ADCY2 PTPN11 GRB2 ADCY8 ADCY7 ADCY6 ADCY5
1568	5.64e-11	blood vessel development	ACVRL1 NRP1 MAP2K1 FIGF TGFB2 NOS3 EGF FGF2 TGFBR1 TGFBR2 SMAD7 CDH5 KDR MAPK1
71495	7.66e-11	cellular response to endogenous stimulus	TGFB1 SHC1 ADCY4 ADCY3 PPARG ADCY2 PTPN11 GRB2 ADCY8 ADCY7 ADCY6 ADCY5
70887	8.01e-11	cellular response to chemical stimulus	SMAD2 TGFB2 TGFB1 SMAD3 SHC1 ADCY4 ADCY3 PRKCA ADCY2 PTPN11 ADCY8 ADCY7 ADCY6 ADCY5 PPARG GRB2
1944	8.16e-11	vasculature development	ACVRL1 NRP1 MAP2K1 FIGF TGFB2 NOS3 EGF FGF2 TGFBR1 TGFBR2 SMAD7 CDH5 KDR MAPK1
8361	8.29e-11	regulation of cell size	ACVRL1 NRP1 SMAD4 TGFB2 TGFB1 SMAD3 NPR1 TGFB3 FGF2 TGFBR1 TGFBR3 PPARG TP53
32501	8.45e-11	multicellular organismal process	ACVRL1 NRP1 FIGF NPR1 NPR2 ADCY3 PIK3CB ADCY8 FGF2 ADCY7 EGFR ADCY5 CDH5 NRAS KDR MAPK1 CD36 HRAS SMAD2 MAP2K1 SMAD4 TGFB2 TGFB1 SMAD3 NOS3 EGF TGFB3 ADIPOQ PRKCA BRAF PTPN11 TGFBR1 TGFBR2 SMAD7 NCOR2 TGFBR3 RIT1 FABP4 LEP PPARG PDE5A KRAS GRB2 TP53
9887	8.46e-11	organ morphogenesis	SMAD2 NRP1 SMAD4 TGFB2 TGFB1 SMAD3 TGFB3 BRAF FGF2 TGFBR1 EGFR TGFBR2 SMAD7 NCOR2 TGFBR3 MAPK1 PPARG GRB2 HRAS
51130	9.53e-11	positive regulation of cellular component organization	SMAD2 SMAD4 TGFB2 TGFB1 SMAD3 EGF TGFB3 TGFA PRKCA CBL TGFBR1 KDR TP53
48545	1.12e-10	response to steroid hormone stimulus	MAP2K1 TGFB2 TGFB1 NOS3 TGFB3 ADIPOQ PRKCA TGFBR1 FABP4 MAPK1 PPARG PDE5A KRAS
6464	1.52e-10	protein modification process	ACVRL1 GUCY2C NPR1 SHC1 NPR2 TGFA PIK3CB CBL FGF2 EGFR KDR MAPK1 SMAD2 MAP2K1 TGFB2 MAP2K2 TGFB1 EGF TGFB3 PRKCA BRAF PTPN11 TGFBR1 TGFBR2 SMAD7 TGFBR3 PIK3CA
30154	1.76e-10	cell differentiation	NRP1 FIGF FGF2 EGFR NRAS KDR HRAS SMAD2 MAP2K1 SMAD4 TGFB2 TGFB1 SMAD3 NOS3 ADIPOQ PRKCA PTPN11 TGFBR1 TGFBR2 NCOR2 TGFBR3 RIT1 FABP4 LEP PPARG KRAS GRB2 TP53
42981	1.76e-10	regulation of apoptosis	NRP1 TGFB2 TGFB1 SMAD3 NOS3 TGFB3 ADIPOQ PRKCA BRAF TGFBR1 EGFR NFKB1 NRAS RIT1 PIK3CA MAPK1 PPARG PDE5A KRAS HRAS TP53
7264	1.84e-10	small GTPase mediated signal transduction	MAP2K1 MAP2K2 SHC1 BRAF FGF2 RAP1B NRAS RIT1 RAP1A MAPK1 KRAS GRB2 HRAS TP53
40008	2.11e-10	regulation of growth	ACVRL1 NRP1 SMAD4 TGFB2 TGFB1 SMAD3 NPR1 SHC1 PTPN11 FGF2 TGFBR1 PIK3CA LEP PPARG TP53
60389	2.14e-10	pathway-restricted SMAD protein phosphorylation	TGFBR3 TGFB2 TGFB1 TGFBR1 TGFBR2 SMAD7
30308	2.15e-10	negative regulation of cell growth	ACVRL1 NRP1 SMAD4 TGFB2 TGFB1 SMAD3 NPR1 PPARG FGF2 TP53
48731	2.16e-10	system development	ACVRL1 NRP1 FIGF NPR2 FGF2 EGFR CDH5 KDR MAPK1 HRAS SMAD2 MAP2K1 SMAD4 TGFB2 TGFB1 SMAD3 NOS3 EGF TGFB3 PRKCA BRAF PTPN11 TGFBR1 TGFBR2 SMAD7 NCOR2 TGFBR3 RIT1 LEP PPARG PDE5A GRB2 TP53
51173	2.31e-10	positive regulation of nitrogen compound metabolic process	ACVRL1 SMAD2 MAP2K1 SMAD4 TGFB1 SMAD3 NPR1 SHC1 TGFB3 FGF2 ADCY7 TGFBR1 EGFR NFKB1 RIT1 MAPK1 PPARG HRAS TP53
51049	2.64e-10	regulation of transport	SMAD4 TGFB2 TGFB1 SMAD3 NOS3 EGF TGFB3 ADIPOQ PRKCA PTPN11 CBL FGF2 TGFBR1 EGFR NFKB1 LEP PPARG
7568	2.68e-10	aging	MAP2K1 NRAS TGFB1 NOS3 TGFB3 PRKCA KRAS GRB2 HRAS TP53 TGFBR1
48869	3.1e-10	cellular developmental process	NRP1 FIGF FGF2 EGFR NRAS KDR HRAS SMAD2 MAP2K1 SMAD4 TGFB2 TGFB1 SMAD3 NOS3 ADIPOQ PRKCA PTPN11 TGFBR1 TGFBR2 NCOR2 TGFBR3 RIT1 FABP4 LEP PPARG KRAS GRB2 TP53
45792	3.94e-10	negative regulation of cell size	ACVRL1 NRP1 SMAD4 TGFB2 TGFB1 SMAD3 NPR1 PPARG FGF2 TP53
43412	4.49e-10	macromolecule modification	ACVRL1 GUCY2C NPR1 SHC1 NPR2 TGFA PIK3CB CBL FGF2 EGFR KDR MAPK1 SMAD2 MAP2K1 TGFB2 MAP2K2 TGFB1 EGF TGFB3 PRKCA BRAF PTPN11 TGFBR1 TGFBR2 SMAD7 TGFBR3 PIK3CA
45597	4.63e-10	positive regulation of cell differentiation	MAP2K1 NRAS MAP2K2 SHC1 MAPK1 KRAS GRB2 FGF2 HRAS TP53
7265	4.63e-10	Ras protein signal transduction	SMAD2 MAP2K1 SMAD4 TGFB2 TGFB1 SMAD3 TGFB3 FGF2 NFKB1 TGFBR2 LEP PPARG CD36
51128	5.23e-10	regulation of cellular component organization	ACVRL1 SMAD2 NRP1 SMAD4 TGFB2 TGFB1 SMAD3 EGF TGFB3 ADIPOQ TGFA PRKCA CBL TGFBR1 SMAD7 KDR TP53
9755	5.75e-10	hormone-mediated signaling pathway	ADCY4 ADCY3 ADCY2 PTPN11 ADCY8 ADCY7 ADCY6 ADCY5
60548	5.76e-10	negative regulation of cell death	SMAD4 SMAD3 NOS3 TGFB3 BRAF FGF2 TGFBR1 EGFR NFKB1 NRAS RIT1 PIK3CA KRAS HRAS TP53
9889	6.86e-10	regulation of biosynthetic process	ACVRL1 NPR1 SHC1 ADCY4 ADCY3 ADCY2 ADCY8 FGF2 ADCY7 EGFR ADCY6 ADCY5 MAPK1 HRAS SMAD2 NCOA2 MAP2K1 SMAD4 TGFB2 TGFB1 SMAD3 NOS3 TGFB3 ADIPOQ PRKCA TGFBR1 NFKB1 SMAD7 NCOR2 RIT1 NCOR1 LEP PPARG KRAS CRK TP53
9891	7.8e-10	positive regulation of biosynthetic process	ACVRL1 SMAD2 SMAD4 TGFB2 TGFB1 SMAD3 NPR1 SHC1 TGFB3 FGF2 ADCY7 TGFBR1 EGFR NFKB1 RIT1 MAPK1 PPARG HRAS TP53
1701	1.03e-09	in utero embryonic development	ACVRL1 NCOR2 SMAD2 MAP2K1 SMAD4 SMAD3 TGFB3 MAPK1 GRB2 TP53 TGFBR1 EGFR
45935	1.17e-09	positive regulation of nucleobase, nucleoside, nucleotide and nucleic acid metabolic process	ACVRL1 SMAD2 MAP2K1 SMAD4 TGFB1 SMAD3 NPR1 SHC1 TGFB3 FGF2 ADCY7 TGFBR1 NFKB1 RIT1 MAPK1 PPARG HRAS TP53
31281	1.36e-09	positive regulation of cyclase activity	NOS3 ADCY4 ADCY3 ADCY2 ADCY8 ADCY7 ADCY6 ADCY5
45926	1.38e-09	negative regulation of growth	ACVRL1 NRP1 SMAD4 TGFB2 TGFB1 SMAD3 NPR1 PPARG FGF2 TP53
33993	1.39e-09	response to lipid	TGFBR3 SMAD2 TGFB1 PPARG TGFBR1 EGFR TGFBR2
32535	1.55e-09	regulation of cellular component size	ACVRL1 NRP1 SMAD4 TGFB2 TGFB1 SMAD3 NPR1 TGFB3 FGF2 TGFBR1 TGFBR3 PPARG TP53
51349	1.75e-09	positive regulation of lyase activity	NOS3 ADCY4 ADCY3 ADCY2 ADCY8 ADCY7 ADCY6 ADCY5
7275	1.75e-09	multicellular organismal development	ACVRL1 NRP1 FIGF NPR1 NPR2 PIK3CB FGF2 EGFR CDH5 KDR MAPK1 HRAS SMAD2 MAP2K1 SMAD4 TGFB2 TGFB1 SMAD3 NOS3 EGF TGFB3 PRKCA BRAF PTPN11 TGFBR1 TGFBR2 SMAD7 NCOR2 TGFBR3 RIT1 LEP PPARG PDE5A GRB2 TP53
90092	1.89e-09	regulation of transmembrane receptor protein serine/threonine kinase signaling pathway	ACVRL1 SMAD2 SMAD4 TGFB1 SMAD3 TGFB3 TP53 TGFBR1 SMAD7
9790	2.62e-09	embryonic development	ACVRL1 SMAD2 MAP2K1 SMAD4 TGFB2 TGFB1 SMAD3 TGFB3 PIK3CB FGF2 TGFBR1 EGFR TGFBR2 NCOR2 MAPK1 GRB2 TP53
31326	2.8e-09	regulation of cellular biosynthetic process	ACVRL1 NPR1 SHC1 ADCY4 ADCY3 ADCY2 ADCY8 FGF2 ADCY7 EGFR ADCY6 ADCY5 MAPK1 HRAS SMAD2 NCOA2 MAP2K1 SMAD4 TGFB1 SMAD3 NOS3 TGFB3 ADIPOQ PRKCA TGFBR1 NFKB1 SMAD7 NCOR2 RIT1 NCOR1 LEP PPARG KRAS CRK TP53
51272	2.96e-09	positive regulation of cellular component movement	MAP2K1 FIGF TGFB2 TGFB1 SMAD3 KDR MAPK1 FGF2 TGFBR1 EGFR
40017	2.96e-09	positive regulation of locomotion	MAP2K1 FIGF TGFB2 TGFB1 SMAD3 KDR MAPK1 PRKCA FGF2 EGFR
22603	3.11e-09	regulation of anatomical structure morphogenesis	SMAD2 NRP1 SMAD4 TGFB2 TGFB1 SMAD3 NPR1 NOS3 TGFB3 ADIPOQ FGF2 SMAD7 KDR
40012	3.28e-09	regulation of locomotion	ACVRL1 MAP2K1 FIGF TGFB2 TGFB1 SMAD3 KDR MAPK1 PRKCA FGF2 EGFR SMAD7
7193	3.47e-09	inhibition of adenylate cyclase activity by G-protein signaling pathway	ADCY4 ADCY3 ADCY2 ADCY8 ADCY7 ADCY6 ADCY5
60341	3.58e-09	regulation of cellular localization	SMAD4 TGFB2 TGFB1 SMAD3 EGF TGFB3 ADIPOQ PRKCA PTPN11 FGF2 TGFBR1 EGFR LEP
48646	3.76e-09	anatomical structure formation involved in morphogenesis	ACVRL1 SMAD2 NRP1 FIGF SMAD4 TGFB2 SMAD3 EGF FGF2 TGFBR2 TGFBR3 KDR GRB2 TP53
7189	4.01e-09	activation of adenylate cyclase activity by G-protein signaling pathway	ADCY4 ADCY3 ADCY2 ADCY8 ADCY7 ADCY6 ADCY5
10578	4.01e-09	regulation of adenylate cyclase activity involved in G-protein signaling pathway	ADCY4 ADCY3 ADCY2 ADCY8 ADCY7 ADCY6 ADCY5
10579	4.01e-09	positive regulation of adenylate cyclase activity by G-protein signaling pathway	ADCY4 ADCY3 ADCY2 ADCY8 ADCY7 ADCY6 ADCY5
32101	4.06e-09	regulation of response to external stimulus	FIGF TGFB1 SMAD3 FABP4 NOS3 LEP ADIPOQ KDR PRKCA PPARG PDE5A
31328	4.52e-09	positive regulation of cellular biosynthetic process	ACVRL1 SMAD2 SMAD4 TGFB1 SMAD3 NPR1 SHC1 TGFB3 FGF2 ADCY7 TGFBR1 EGFR NFKB1 RIT1 MAPK1 PPARG HRAS TP53
44057	4.68e-09	regulation of system process	MAP2K1 TGFB2 NPR1 NOS3 PRKCA PTPN11 EGFR SMAD7 NRAS LEP PDE5A KRAS HRAS
90316	5.55e-09	positive regulation of intracellular protein transport	SMAD4 TGFB1 SMAD3 EGF TGFB3 TGFBR1 EGFR
30155	5.76e-09	regulation of cell adhesion	ACVRL1 MAP2K1 TGFB2 TGFB1 SMAD3 ADIPOQ KDR PIK3CB CD36 SMAD7
10604	6.14e-09	positive regulation of macromolecule metabolic process	ACVRL1 SMAD2 MAP2K1 SMAD4 TGFB2 TGFB1 SMAD3 SHC1 TGFB3 ADIPOQ PRKCA FGF2 TGFBR1 NFKB1 SMAD7 RIT1 MAPK1 PPARG HRAS TP53
35239	6.71e-09	tube morphogenesis	NRP1 SMAD4 TGFB1 SMAD3 NPR1 NOS3 EGF KDR PDE5A FGF2 TGFBR2
32388	8.88e-09	positive regulation of intracellular transport	SMAD4 TGFB1 SMAD3 EGF TGFB3 TGFBR1 EGFR
51050	1.08e-08	positive regulation of transport	SMAD4 TGFB2 TGFB1 SMAD3 EGF TGFB3 ADIPOQ PRKCA PTPN11 CBL TGFBR1 EGFR
7173	1.08e-08	epidermal growth factor receptor signaling pathway	TGFB1 SHC1 EGF GRB2 CBL EGFR
1558	1.15e-08	regulation of cell growth	ACVRL1 NRP1 SMAD4 TGFB2 TGFB1 SMAD3 NPR1 PPARG FGF2 TP53 TGFBR1
48729	1.31e-08	tissue morphogenesis	TGFBR3 SMAD2 NRP1 SMAD4 TGFB2 TGFB1 SMAD3 GRB2 FGF2 EGFR TGFBR2 SMAD7
9967	1.36e-08	positive regulation of signal transduction	NRAS TGFB2 TGFB1 LEP ADIPOQ BRAF PTPN11 KRAS FGF2 HRAS TGFBR1 EGFR
30334	1.37e-08	regulation of cell migration	SMAD4 TGFB1 SMAD3 EGF TGFB3 PTPN11 TGFBR1 EGFR
33157	1.37e-08	regulation of intracellular protein transport	ACVRL1 MAP2K1 FIGF TGFB2 TGFB1 SMAD3 KDR MAPK1 FGF2 EGFR SMAD7
1932	1.43e-08	regulation of protein amino acid phosphorylation	SMAD4 TGFB1 SMAD3 EGF TGFB3 ADIPOQ PRKCA FGF2 TGFBR1 EGFR SMAD7
23056	1.62e-08	positive regulation of signaling process	NRAS TGFB2 TGFB1 LEP ADIPOQ BRAF PTPN11 KRAS FGF2 HRAS TGFBR1 EGFR
48514	1.63e-08	blood vessel morphogenesis	ACVRL1 NRP1 FIGF TGFB2 NOS3 EGF KDR FGF2 TGFBR1 TGFBR2 SMAD7
17015	1.76e-08	regulation of transforming growth factor beta receptor signaling pathway	SMAD2 SMAD4 TGFB1 SMAD3 TGFB3 TP53 SMAD7
30808	1.76e-08	regulation of nucleotide biosynthetic process	SMAD4 TGFB1 SMAD3 EGF TGFB3 PTPN11 TGFBR1 EGFR
46822	1.76e-08	regulation of nucleocytoplasmic transport	NPR1 NOS3 ADCY4 ADCY3 ADCY2 ADCY8 ADCY7 ADCY6 ADCY5
30802	1.76e-08	regulation of cyclic nucleotide biosynthetic process	NPR1 NOS3 ADCY4 ADCY3 ADCY2 ADCY8 ADCY7 ADCY6 ADCY5
30799	2.18e-08	regulation of cyclic nucleotide metabolic process	NPR1 NOS3 ADCY4 ADCY3 ADCY2 ADCY8 ADCY7 ADCY6 ADCY5
43009	2.25e-08	chordate embryonic development	ACVRL1 SMAD2 MAP2K1 SMAD4 SMAD3 TGFB3 TGFBR1 EGFR TGFBR2 NCOR2 MAPK1 GRB2 TP53
51222	2.29e-08	positive regulation of protein transport	TGFBR3 TGFB2 TGFB1 SMAD3 KDR TGFA FGF2 EGFR
50678	2.29e-08	regulation of epithelial cell proliferation	SMAD4 TGFB2 TGFB1 SMAD3 EGF TGFB3 TGFBR1 EGFR
40011	2.46e-08	locomotion	ACVRL1 NRP1 MAP2K1 TGFB2 TGFB1 NOS3 PRKCA PIK3CB FGF2 TGFBR1 EGFR TGFBR3 MAPK1 HRAS
51350	2.47e-08	negative regulation of lyase activity	ACVRL1 SMAD2 MAP2K1 SMAD4 SMAD3 TGFB3 TGFBR1 EGFR TGFBR2 NCOR2 MAPK1 GRB2 TP53
9792	2.47e-08	embryonic development ending in birth or egg hatching	ADCY4 ADCY3 ADCY2 ADCY8 ADCY7 ADCY6 ADCY5
7194	2.47e-08	negative regulation of adenylate cyclase activity	ADCY4 ADCY3 ADCY2 ADCY8 ADCY7 ADCY6 ADCY5
31280	2.47e-08	negative regulation of cyclase activity	ADCY4 ADCY3 ADCY2 ADCY8 ADCY7 ADCY6 ADCY5
19932	2.49e-08	second-messenger-mediated signaling	PIK3CA ADCY4 ADCY3 ADCY2 PIK3CB CD36 ADCY8 ADCY7 EGFR ADCY6 ADCY5
30335	2.72e-08	positive regulation of cell migration	MAP2K1 FIGF TGFB2 TGFB1 SMAD3 KDR MAPK1 FGF2 EGFR
7190	3.16e-08	activation of adenylate cyclase activity	ADCY4 ADCY3 ADCY2 ADCY8 ADCY7 ADCY6 ADCY5
42327	3.3e-08	positive regulation of phosphorylation	SMAD4 TGFB1 EGF TGFB3 ADIPOQ PRKCA FGF2 TGFBR1 EGFR
45762	3.53e-08	positive regulation of adenylate cyclase activity	SMAD3 NOS3 TGFB3 BRAF TGFBR1 EGFR NFKB1 NRAS RIT1 PIK3CA KRAS HRAS TP53
43066	3.53e-08	negative regulation of apoptosis	ADCY4 ADCY3 ADCY2 ADCY8 ADCY7 ADCY6 ADCY5
10562	3.95e-08	positive regulation of phosphorus metabolic process	SMAD4 TGFB1 EGF TGFB3 ADIPOQ PRKCA FGF2 TGFBR1 EGFR
45937	3.95e-08	positive regulation of phosphate metabolic process	SMAD4 TGFB1 EGF TGFB3 ADIPOQ PRKCA FGF2 TGFBR1 EGFR
10769	3.99e-08	regulation of cell morphogenesis involved in differentiation	SMAD2 NRP1 SMAD4 TGFB2 TGFB1 SMAD3 TGFB3 SMAD7
43069	4.01e-08	negative regulation of programmed cell death	ACVRL1 GUCY2C NPR1 SHC1 NPR2 TGFA PIK3CB CBL FGF2 EGFR KDR MAPK1 SMAD2 MAP2K1 TGFB2 MAP2K2 TGFB1 EGF TGFB3 PRKCA BRAF PTPN11 TGFBR1 NFKB1 TGFBR2 SMAD7 TGFBR3 PIK3CA
44267	4.01e-08	cellular protein metabolic process	SMAD3 NOS3 TGFB3 BRAF TGFBR1 EGFR NFKB1 NRAS RIT1 PIK3CA KRAS HRAS TP53
80090	4.24e-08	regulation of primary metabolic process	ACVRL1 NPR1 SHC1 ADCY4 ADCY3 ADCY2 ADCY8 FGF2 ADCY7 EGFR ADCY6 ADCY5 MAPK1 HRAS SMAD2 NCOA2 MAP2K1 SMAD4 TGFB1 SMAD3 NOS3 EGF TGFB3 ADIPOQ PRKCA TGFBR1 NFKB1 SMAD7 NCOR2 RIT1 NCOR1 LEP PPARG KRAS CRK TP53
7610	4.78e-08	behavior	MAP2K1 TGFB2 ADCY3 PRKCA PIK3CB ADCY8 FGF2 ADCY5 NRAS LEP MAPK1 PDE5A KRAS HRAS
60284	5.3e-08	regulation of cell development	SMAD2 NRP1 SMAD4 TGFB2 TGFB1 SMAD3 TGFB3 PPARG FGF2 TP53 SMAD7
32268	5.41e-08	regulation of cellular protein metabolic process	SMAD4 TGFB1 SMAD3 NOS3 EGF TGFB3 ADIPOQ PRKCA FGF2 TGFBR1 EGFR NFKB1 SMAD7 MAPK1 TP53
32386	5.86e-08	regulation of intracellular transport	SMAD4 TGFB1 SMAD3 EGF TGFB3 PTPN11 TGFBR1 EGFR
31279	6.86e-08	regulation of cyclase activity	NOS3 ADCY4 ADCY3 ADCY2 ADCY8 ADCY7 ADCY6 ADCY5
51223	7.49e-08	regulation of protein transport	SMAD4 TGFB2 TGFB1 SMAD3 EGF TGFB3 PTPN11 TGFBR1 EGFR
51716	7.51e-08	cellular response to stimulus	SMAD2 TGFB2 TGFB1 SMAD3 SHC1 NOS3 ADCY4 ADCY3 PRKCA ADCY2 PTPN11 ADCY8 ADCY7 ADCY6 ADCY5 MAPK1 PPARG GRB2 TP53
51339	7.92e-08	regulation of lyase activity	NOS3 ADCY4 ADCY3 ADCY2 ADCY8 ADCY7 ADCY6 ADCY5
42306	8.33e-08	regulation of protein import into nucleus	SMAD4 TGFB1 SMAD3 EGF TGFB3 TGFBR1 EGFR
10557	8.5e-08	positive regulation of macromolecule biosynthetic process	ACVRL1 SMAD2 SMAD4 TGFB2 TGFB1 SMAD3 SHC1 TGFB3 FGF2 TGFBR1 NFKB1 RIT1 MAPK1 PPARG HRAS TP53
1666	9.17e-08	response to hypoxia	SMAD2 TGFB1 TGFBR1 TGFBR2
22604	9.17e-08	regulation of cell morphogenesis	SMAD4 TGFB2 TGFB1 SMAD3 NOS3 TGFB3 ADIPOQ PDE5A TGFBR1
70723	9.17e-08	response to cholesterol	SMAD2 NRP1 SMAD4 TGFB2 TGFB1 SMAD3 TGFB3 KDR SMAD7
60429	9.96e-08	epithelium development	SMAD2 NRP1 MAP2K1 SMAD4 TGFB1 SMAD3 KDR PPARG GRB2 FGF2 EGFR TGFBR2
70201	1.14e-07	regulation of establishment of protein localization	SMAD4 TGFB2 TGFB1 SMAD3 EGF TGFB3 PTPN11 TGFBR1 EGFR
44260	1.27e-07	cellular macromolecule metabolic process	ACVRL1 GUCY2C NPR1 SHC1 NPR2 TGFA PIK3CB CBL FGF2 EGFR KDR MAPK1 CD36 SMAD2 MAP2K1 TGFB2 MAP2K2 TGFB1 SMAD3 EGF TGFB3 PRKCA BRAF PTPN11 TGFBR1 NFKB1 TGFBR2 SMAD7 TGFBR3 RIT1 NCOR1 PIK3CA PPARG GRB2 TP53
51781	1.28e-07	positive regulation of cell division	FIGF TGFB2 TGFB1 TGFB3 TGFA FGF2
32583	1.35e-07	regulation of gene-specific transcription	NCOR2 SMAD2 NCOR1 TGFB1 SMAD3 TGFB3 PPARG TP53 NFKB1 SMAD7
70482	1.49e-07	response to oxygen levels	SMAD4 TGFB2 TGFB1 SMAD3 NOS3 TGFB3 ADIPOQ PDE5A TGFBR1
60391	1.74e-07	positive regulation of SMAD protein nuclear translocation	SMAD4 TGFB1 TGFB3 TGFBR1
7183	1.74e-07	SMAD protein complex assembly	SMAD2 SMAD4 TGFB1 SMAD3
7169	1.8e-07	transmembrane receptor protein tyrosine kinase signaling pathway	FIGF TGFB1 SHC1 EGF KDR PTPN11 GRB2 CBL FGF2 EGFR
48583	1.84e-07	regulation of response to stimulus	FIGF TGFB2 TGFB1 SMAD3 NOS3 ADIPOQ PRKCA NCOR1 FABP4 LEP KDR MAPK1 PPARG PDE5A
60393	1.84e-07	regulation of pathway-restricted SMAD protein phosphorylation	SMAD4 TGFB1 TGFB3 TGFBR1 SMAD7
60021	1.94e-07	palate development	TGFBR3 SMAD2 SMAD4 TGFB3 TGFBR1 TGFBR2
51093	2.11e-07	negative regulation of developmental process	NCOR2 NRP1 TGFB1 SMAD3 NPR1 ADIPOQ MAPK1 PPARG TP53 TGFBR1 SMAD7
31399	2.33e-07	regulation of protein modification process	SMAD4 TGFB1 SMAD3 EGF TGFB3 ADIPOQ PRKCA FGF2 TP53 TGFBR1 EGFR SMAD7
51171	2.53e-07	regulation of nitrogen compound metabolic process	ACVRL1 NPR1 SHC1 ADCY4 ADCY3 ADCY2 ADCY8 FGF2 ADCY7 EGFR ADCY6 ADCY5 MAPK1 HRAS SMAD2 NCOA2 MAP2K1 SMAD4 TGFB1 SMAD3 NOS3 TGFB3 TGFBR1 NFKB1 SMAD7 NCOR2 RIT1 NCOR1 PPARG KRAS CRK TP53
51246	2.61e-07	regulation of protein metabolic process	SMAD4 TGFB1 SMAD3 NOS3 EGF TGFB3 ADIPOQ PRKCA FGF2 TGFBR1 EGFR NFKB1 SMAD7 MAPK1 TP53
187	2.73e-07	activation of MAPK activity	MAP2K1 SHC1 TGFB3 TGFA PTPN11 PIK3CB FGF2
1763	2.92e-07	morphogenesis of a branching structure	SMAD2 SMAD3 TGFB3 TGFBR1 TGFBR2
32880	2.92e-07	regulation of protein localization	SMAD4 TGFB2 TGFB1 SMAD3 EGF TGFB3 PTPN11 TGFBR1 EGFR
48701	2.92e-07	embryonic cranial skeleton morphogenesis	NRP1 SMAD4 TGFB1 EGF KDR GRB2 FGF2 TGFBR2
60390	2.93e-07	regulation of SMAD protein nuclear translocation	SMAD4 TGFB1 TGFB3 TGFBR1
45596	3.18e-07	negative regulation of cell differentiation	NCOR2 NRP1 TGFB1 SMAD3 ADIPOQ MAPK1 PPARG TP53 TGFBR1 SMAD7
9888	3.29e-07	tissue development	SMAD2 NRP1 MAP2K1 SMAD4 TGFB2 TGFB1 SMAD3 PRKCA FGF2 EGFR TGFBR2 SMAD7 TGFBR3 KDR PPARG GRB2
51302	4.12e-07	regulation of cell division	FIGF TGFB2 TGFB1 TGFB3 TGFA FGF2
10720	4.42e-07	positive regulation of cell development	SMAD2 SMAD4 TGFB2 TGFB1 SMAD3 TGFB3 PPARG
48870	4.61e-07	cell motility	ACVRL1 TGFBR3 NRP1 MAP2K1 TGFB2 TGFB1 NOS3 PRKCA FGF2 TGFBR1 EGFR
51674	4.61e-07	localization of cell	ACVRL1 TGFBR3 NRP1 MAP2K1 TGFB2 TGFB1 NOS3 PRKCA FGF2 TGFBR1 EGFR
19935	4.64e-07	cyclic-nucleotide-mediated signaling	ADCY4 ADCY3 ADCY2 CD36 ADCY8 ADCY7 ADCY6 ADCY5
7188	4.71e-07	G-protein signaling, coupled to cAMP nucleotide second messenger	ADCY4 ADCY3 ADCY2 ADCY8 ADCY7 ADCY6 ADCY5
44237	5.34e-07	cellular metabolic process	NRP1 TGFB2 TGFB1 TGFB3 EGFR
7435	5.34e-07	salivary gland morphogenesis	ACVRL1 GUCY2C NPR1 SHC1 NPR2 TGFA ADCY2 PIK3CB CBL FGF2 EGFR KDR MAPK1 CD36 SMAD2 MAP2K1 TGFB2 MAP2K2 TGFB1 SMAD3 NOS3 EGF TGFB3 ADIPOQ PRKCA BRAF PTPN11 TGFBR1 NFKB1 TGFBR2 SMAD7 TGFBR3 RIT1 NCOR1 FABP4 PIK3CA LEP PPARG PDE5A GRB2 TP53
32103	5.47e-07	positive regulation of response to external stimulus	FIGF TGFB1 SMAD3 FABP4 KDR PRKCA PDE5A
10627	5.99e-07	regulation of intracellular protein kinase cascade	TGFB2 NCOR1 TGFB1 LEP ADIPOQ BRAF GRB2 FGF2 HRAS TGFBR1 EGFR
9987	6.14e-07	cellular process	ACVRL1 NRP1 PIK3CB FGF2 CDH5 KDR CD36 HRAS MAP2K1 MAP2K2 ADIPOQ PRKCA TGFBR1 TGFBR2 NCOR2 TGFBR3 NCOR1 PIK3CA PPARG PDE5A CRK TP53 GUCY2C FIGF NPR1 SHC1 NPR2 ADCY4 ADCY3 TGFA ADCY2 ADCY8 CBL ADCY7 EGFR ADCY6 ADCY5 NRAS MAPK1 SMAD2 SMAD4 TGFB2 TGFB1 SMAD3 NOS3 EGF TGFB3 BRAF PTPN11 NFKB1 SMAD7 RIT1 FABP4 LEP KRAS GRB2
45778	6.41e-07	positive regulation of ossification	NRP1 TGFB2 TGFB1 SMAD3 TGFB3
48754	6.81e-07	branching morphogenesis of a tube	NRP1 SMAD4 TGFB1 EGF KDR FGF2 TGFBR2
34405	7.05e-07	response to fluid shear stress	TGFB1 NOS3 TGFB3 SMAD7
35020	7.05e-07	regulation of Rac protein signal transduction	NRAS KRAS HRAS CRK
48732	7.2e-07	gland development	NRP1 TGFB2 TGFB1 SMAD3 EGF TGFB3 FGF2 TGFBR1 EGFR
43523	7.22e-07	regulation of neuron apoptosis	NRAS TGFB2 TGFB3 BRAF KRAS HRAS TP53
10558	7.45e-07	negative regulation of macromolecule biosynthetic process	SMAD2 SMAD4 TGFB1 SMAD3 TGFB3 ADIPOQ PRKCA FGF2 NFKB1 SMAD7 NCOR2 NCOR1 PPARG TP53
7431	7.55e-07	salivary gland development	NRP1 TGFB2 TGFB1 TGFB3 EGFR
19219	7.89e-07	regulation of nucleobase, nucleoside, nucleotide and nucleic acid metabolic process	ACVRL1 NPR1 SHC1 ADCY4 ADCY3 ADCY2 ADCY8 FGF2 ADCY7 ADCY6 ADCY5 MAPK1 HRAS SMAD2 NCOA2 MAP2K1 SMAD4 TGFB1 SMAD3 NOS3 TGFB3 TGFBR1 NFKB1 SMAD7 NCOR2 RIT1 NCOR1 PPARG KRAS CRK TP53
19933	8.26e-07	cAMP-mediated signaling	ADCY4 ADCY3 ADCY2 ADCY8 ADCY7 ADCY6 ADCY5
31327	1.06e-06	negative regulation of cellular biosynthetic process	SMAD2 SMAD4 TGFB1 SMAD3 TGFB3 ADIPOQ PRKCA FGF2 NFKB1 SMAD7 NCOR2 NCOR1 PPARG TP53
45761	1.1e-06	regulation of adenylate cyclase activity	ADCY4 ADCY3 ADCY2 ADCY8 ADCY7 ADCY6 ADCY5
60	1.27e-06	protein import into nucleus, translocation	TGFB2 TGFB1 MAPK1 FGF2 TP53
9890	1.28e-06	negative regulation of biosynthetic process	SMAD2 SMAD4 TGFB1 SMAD3 TGFB3 ADIPOQ PRKCA FGF2 NFKB1 SMAD7 NCOR2 NCOR1 PPARG TP53
1657	1.28e-06	ureteric bud development	SMAD2 SMAD4 TGFB1 SMAD3 FGF2 SMAD7
2520	1.28e-06	immune system development	TGFBR3 TGFB2 RIT1 TGFB1 SMAD3 KDR PPARG TP53 TGFBR1 TGFBR2
40007	1.3e-06	growth	TGFBR3 SMAD2 SMAD4 TGFB2 TGFB1 SMAD3 TGFB3 PTPN11 TP53
6140	1.49e-06	regulation of nucleotide metabolic process	ACVRL1 NRP1 FIGF TGFB2 EGF KDR FGF2 TGFBR2
1525	1.49e-06	angiogenesis	MAP2K1 NPR1 NOS3 ADCY4 ADCY3 ADCY2 ADCY8 ADCY7 ADCY6 ADCY5
43065	1.53e-06	positive regulation of apoptosis	NRP1 TGFB2 TGFB1 SMAD3 TGFB3 ADIPOQ MAPK1 PRKCA PPARG PDE5A TP53 TGFBR1
16477	1.53e-06	cell migration	ACVRL1 TGFBR3 NRP1 TGFB2 TGFB1 NOS3 PRKCA FGF2 TGFBR1 EGFR
6950	1.56e-06	response to stress	ACVRL1 NRP1 MAP2K1 SMAD4 TGFB2 TGFB1 SMAD3 NOS3 TGFB3 ADIPOQ PRKCA PTPN11 PIK3CB FGF2 TGFBR1 EGFR NFKB1 SMAD7 MAPK1 PPARG PDE5A CD36 TP53
10551	1.62e-06	regulation of gene-specific transcription from RNA polymerase II promoter	NCOR2 NCOR1 TGFB1 SMAD3 PPARG TP53 NFKB1 SMAD7
43068	1.62e-06	positive regulation of programmed cell death	NRP1 TGFB2 TGFB1 SMAD3 TGFB3 ADIPOQ MAPK1 PRKCA PPARG PDE5A TP53 TGFBR1
22008	1.66e-06	neurogenesis	SMAD2 MAP2K1 SMAD3 TGFB3 MAPK1 GRB2 TGFBR1 EGFR TGFBR2
48568	1.66e-06	embryonic organ development	NRP1 MAP2K1 SMAD4 TGFB2 TGFB1 PRKCA PTPN11 FGF2 TGFBR1 EGFR RIT1 LEP PPARG TP53
1952	1.66e-06	regulation of cell-matrix adhesion	ACVRL1 SMAD3 KDR PIK3CB CD36
10942	1.76e-06	positive regulation of cell death	NRP1 TGFB2 TGFB1 SMAD3 TGFB3 ADIPOQ MAPK1 PRKCA PPARG PDE5A TP53 TGFBR1
10553	1.78e-06	negative regulation of gene-specific transcription from RNA polymerase II promoter	NCOR2 NCOR1 SMAD3 PPARG NFKB1 SMAD7
6357	1.78e-06	regulation of transcription from RNA polymerase II promoter	SMAD2 MAP2K1 SMAD4 TGFB1 SMAD3 TGFB3 FGF2 NFKB1 SMAD7 NCOR2 RIT1 NCOR1 PPARG CRK TP53
32270	1.97e-06	positive regulation of cellular protein metabolic process	SMAD4 TGFB1 TGFB3 ADIPOQ MAPK1 PRKCA FGF2 TP53 TGFBR1 SMAD7
32909	1.98e-06	regulation of transforming growth factor-beta2 production	SMAD4 TGFB2 SMAD3
35022	1.98e-06	positive regulation of Rac protein signal transduction	NRAS KRAS HRAS
19538	2.02e-06	protein metabolic process	ACVRL1 GUCY2C NPR1 SHC1 NPR2 TGFA PIK3CB CBL FGF2 EGFR KDR MAPK1 SMAD2 MAP2K1 TGFB2 MAP2K2 TGFB1 EGF TGFB3 PRKCA BRAF PTPN11 TGFBR1 NFKB1 TGFBR2 SMAD7 TGFBR3 PIK3CA
7507	2.02e-06	heart development	NCOR2 TGFBR3 SMAD2 NRP1 TGFB2 SMAD3 TGFBR1 TGFBR2 SMAD7
10740	2.09e-06	positive regulation of intracellular protein kinase cascade	TGFB2 TGFB1 LEP ADIPOQ BRAF FGF2 HRAS TGFBR1 EGFR
35272	2.51e-06	exocrine system development	NRP1 TGFB2 TGFB1 TGFB3 EGFR
30817	2.82e-06	regulation of cAMP biosynthetic process	ADCY4 ADCY3 ADCY2 ADCY8 ADCY7 ADCY6 ADCY5
90100	2.87e-06	positive regulation of transmembrane receptor protein serine/threonine kinase signaling pathway	ACVRL1 SMAD4 TGFB1 TGFB3 TGFBR1
31401	2.88e-06	positive regulation of protein modification process	SMAD4 TGFB1 TGFB3 ADIPOQ PRKCA FGF2 TP53 TGFBR1 SMAD7
7611	2.95e-06	learning or memory	TGFB1 NOS3 TGFB3 MAPK1 PRKCA PPARG TGFBR1
43627	2.95e-06	response to estrogen stimulus	NRAS ADCY3 PRKCA PDE5A KRAS ADCY8 HRAS
30814	3.12e-06	regulation of cAMP metabolic process	ADCY4 ADCY3 ADCY2 ADCY8 ADCY7 ADCY6 ADCY5
51247	3.17e-06	positive regulation of protein metabolic process	SMAD4 TGFB1 TGFB3 ADIPOQ MAPK1 PRKCA FGF2 TP53 TGFBR1 SMAD7
45941	3.28e-06	positive regulation of transcription	ACVRL1 SMAD2 SMAD4 TGFB1 SMAD3 TGFB3 FGF2 TGFBR1 NFKB1 RIT1 MAPK1 PPARG TP53
7187	3.28e-06	G-protein signaling, coupled to cyclic nucleotide second messenger	ADCY4 ADCY3 ADCY2 ADCY8 ADCY7 ADCY6 ADCY5
43170	3.53e-06	macromolecule metabolic process	ACVRL1 GUCY2C NPR1 SHC1 NPR2 TGFA PIK3CB CBL FGF2 EGFR KDR MAPK1 CD36 SMAD2 MAP2K1 TGFB2 MAP2K2 TGFB1 SMAD3 EGF TGFB3 PRKCA BRAF PTPN11 TGFBR1 NFKB1 TGFBR2 SMAD7 TGFBR3 RIT1 NCOR1 PIK3CA PPARG GRB2 TP53
45892	3.9e-06	negative regulation of transcription, DNA-dependent	NCOR2 SMAD2 SMAD4 NCOR1 TGFB1 SMAD3 PPARG FGF2 TP53 NFKB1 SMAD7
51046	3.98e-06	regulation of secretion	TGFB2 TGFB1 EGF TGFB3 LEP ADIPOQ PRKCA PTPN11 FGF2
1934	4.07e-06	positive regulation of protein amino acid phosphorylation	SMAD4 TGFB1 TGFB3 ADIPOQ PRKCA FGF2 TGFBR1
10862	4.15e-06	positive regulation of pathway-restricted SMAD protein phosphorylation	SMAD4 TGFB1 TGFB3 TGFBR1
35413	4.55e-06	positive regulation of catenin protein nuclear translocation	NCOR2 SMAD2 SMAD4 NCOR1 TGFB1 SMAD3 PPARG FGF2 TP53 NFKB1 SMAD7
51253	4.55e-06	negative regulation of RNA metabolic process	TGFB1 TGFB3 SMAD7
34616	4.55e-06	response to laminar fluid shear stress	SMAD3 EGF EGFR
48699	4.58e-06	generation of neurons	NRP1 MAP2K1 SMAD4 TGFB2 TGFB1 PRKCA PTPN11 TGFBR1 EGFR RIT1 LEP PPARG TP53
50921	4.59e-06	positive regulation of chemotaxis	FIGF TGFB1 SMAD3 KDR PRKCA
35265	5.2e-06	organ growth	TGFBR3 SMAD2 TGFB2 PTPN11
10628	5.37e-06	positive regulation of gene expression	ACVRL1 SMAD2 SMAD4 TGFB1 SMAD3 TGFB3 FGF2 TGFBR1 NFKB1 RIT1 MAPK1 PPARG TP53
48585	5.49e-06	negative regulation of response to stimulus	TGFB2 NCOR1 TGFB1 LEP ADIPOQ PRKCA PPARG
42698	6.06e-06	ovulation cycle	TGFB2 NOS3 TGFB3 LEP KDR EGFR
1501	6.09e-06	skeletal system development	SMAD2 TGFB1 SMAD3 TGFB3 NPR2 PRKCA FGF2 TGFBR1 EGFR TGFBR2
50679	6.42e-06	positive regulation of epithelial cell proliferation	TGFB2 TGFB1 SMAD3 TGFB3 SMAD7
45216	6.42e-06	cell-cell junction organization	TGFB1 KDR TGFA FGF2 EGFR
48534	6.9e-06	hemopoietic or lymphoid organ development	TGFBR3 TGFB2 RIT1 TGFB1 KDR PPARG TP53 TGFBR1 TGFBR2
32582	8.53e-06	negative regulation of gene-specific transcription	NCOR2 NCOR1 SMAD3 PPARG NFKB1 SMAD7
48520	8.89e-06	positive regulation of behavior	FIGF TGFB1 SMAD3 KDR PRKCA
45165	8.93e-06	cell fate commitment	SMAD2 SMAD4 KDR PPARG FGF2 TP53 TGFBR1
48584	9.03e-06	positive regulation of response to stimulus	FIGF TGFB2 TGFB1 SMAD3 FABP4 KDR MAPK1 PRKCA PDE5A
44238	9.54e-06	primary metabolic process	ACVRL1 GUCY2C NPR1 SHC1 NPR2 TGFA ADCY2 PIK3CB CBL FGF2 EGFR KDR MAPK1 CD36 SMAD2 MAP2K1 TGFB2 MAP2K2 TGFB1 SMAD3 NOS3 EGF TGFB3 ADIPOQ PRKCA BRAF PTPN11 TGFBR1 NFKB1 TGFBR2 SMAD7 TGFBR3 RIT1 NCOR1 FABP4 PIK3CA LEP PPARG PDE5A TP53
42060	9.58e-06	wound healing	ACVRL1 TGFB2 TGFB1 SMAD3 TGFB3 PIK3CB CD36 FGF2
50927	9.61e-06	positive regulation of positive chemotaxis	FIGF SMAD3 KDR PRKCA
9892	9.71e-06	negative regulation of metabolic process	SMAD2 SMAD4 TGFB1 SMAD3 TGFB3 ADIPOQ PRKCA FGF2 NFKB1 SMAD7 NCOR2 NCOR1 LEP PPARG TP53
50926	1.16e-05	regulation of positive chemotaxis	FIGF SMAD3 KDR PRKCA
2009	1.22e-05	morphogenesis of an epithelium	NRP1 SMAD4 TGFB1 SMAD3 GRB2 FGF2 EGFR TGFBR2
9605	1.3e-05	response to external stimulus	MAP2K1 TGFB2 TGFB1 LEP ADIPOQ MAPK1 PRKCA PPARG PIK3CB FGF2 HRAS TP53
50920	1.3e-05	regulation of chemotaxis	FIGF TGFB1 SMAD3 KDR PRKCA
32371	1.38e-05	regulation of sterol transport	LEP ADIPOQ PPARG NFKB1
32374	1.38e-05	regulation of cholesterol transport	LEP ADIPOQ PPARG NFKB1
45934	1.41e-05	negative regulation of nucleobase, nucleoside, nucleotide and nucleic acid metabolic process	NCOR2 SMAD2 SMAD4 NCOR1 TGFB1 SMAD3 TGFB3 PPARG FGF2 TP53 NFKB1 SMAD7
7399	1.54e-05	nervous system development	NRP1 MAP2K1 SMAD4 TGFB2 TGFB1 PRKCA PTPN11 FGF2 TGFBR1 EGFR TGFBR2 NCOR2 RIT1 LEP PPARG PDE5A TP53
43524	1.55e-05	negative regulation of neuron apoptosis	NRAS TGFB3 BRAF KRAS HRAS
51172	1.56e-05	negative regulation of nitrogen compound metabolic process	NCOR2 SMAD2 SMAD4 NCOR1 TGFB1 SMAD3 TGFB3 PPARG FGF2 TP53 NFKB1 SMAD7
31324	1.67e-05	negative regulation of cellular metabolic process	SMAD2 SMAD4 TGFB1 SMAD3 TGFB3 ADIPOQ PRKCA FGF2 NFKB1 SMAD7 NCOR2 NCOR1 PPARG TP53
10810	1.68e-05	regulation of cell-substrate adhesion	ACVRL1 SMAD3 KDR PIK3CB CD36
48565	1.68e-05	digestive tract development	SMAD2 TGFB1 SMAD3 TGFB3 TGFBR1
51384	1.73e-05	response to glucocorticoid stimulus	ACVRL1 NPR1 NOS3 NPR2 ADIPOQ PPARG
8217	1.73e-05	regulation of blood pressure	MAP2K1 TGFB1 FABP4 ADIPOQ PRKCA KRAS
16043	1.78e-05	cellular component organization	NRP1 EGFR NRAS CD36 HRAS SMAD2 MAP2K1 SMAD4 TGFB2 TGFB1 SMAD3 NOS3 TGFB3 ADIPOQ PRKCA BRAF PTPN11 TGFBR1 SMAD7 TGFBR3 RIT1 NCOR1 KRAS GRB2 CRK TP53
7492	1.89e-05	endoderm development	SMAD2 SMAD4 TGFB1 SMAD3
6928	1.91e-05	cellular component movement	ACVRL1 TGFBR3 NRP1 MAP2K1 TGFB2 TGFB1 NOS3 PRKCA FGF2 TGFBR1 EGFR
61138	2.04e-05	morphogenesis of a branching epithelium	NRP1 SMAD4 TGFB1 GRB2 FGF2 TGFBR2
10605	2.06e-05	negative regulation of macromolecule metabolic process	SMAD2 SMAD4 TGFB1 SMAD3 TGFB3 ADIPOQ PRKCA FGF2 NFKB1 SMAD7 NCOR2 NCOR1 PPARG TP53
10743	2.2e-05	regulation of macrophage derived foam cell differentiation	ADIPOQ PPARG CD36 NFKB1
35412	2.21e-05	regulation of catenin protein nuclear translocation	NCOR2 FABP4 PPARG
50872	2.21e-05	white fat cell differentiation	SMAD3 EGF EGFR
30324	2.25e-05	lung development	SMAD2 NOS3 TGFB3 KDR FGF2 TGFBR1
51051	2.49e-05	negative regulation of transport	TGFB1 NOS3 EGF ADIPOQ PRKCA PTPN11 NFKB1
43408	2.49e-05	regulation of MAPKKK cascade	TGFB2 NCOR1 LEP BRAF GRB2 FGF2 HRAS
31960	2.5e-05	response to corticosteroid stimulus	MAP2K1 TGFB1 FABP4 ADIPOQ PRKCA KRAS
30323	2.63e-05	respiratory tube development	SMAD2 NOS3 TGFB3 KDR FGF2 TGFBR1
48704	2.71e-05	embryonic skeletal system morphogenesis	SMAD2 SMAD3 TGFB3 TGFBR1 TGFBR2
16481	2.73e-05	negative regulation of transcription	NCOR2 SMAD2 SMAD4 NCOR1 TGFB1 SMAD3 PPARG FGF2 TP53 NFKB1 SMAD7
30097	2.79e-05	hemopoiesis	TGFBR3 TGFB2 RIT1 TGFB1 KDR PPARG TP53 TGFBR2
45598	2.88e-05	regulation of fat cell differentiation	EGF FGF2 TGFBR1 EGFR
186	2.88e-05	activation of MAPKK activity	NCOR2 TGFB1 ADIPOQ PPARG
22407	2.88e-05	regulation of cell-cell adhesion	MAP2K1 TGFB1 ADIPOQ SMAD7
6917	3e-05	induction of apoptosis	NRP1 TGFB1 SMAD3 TGFB3 MAPK1 PRKCA PPARG TP53 TGFBR1
7050	3.02e-05	cell cycle arrest	MAP2K1 TGFB2 TGFB1 SMAD3 HRAS TP53
9628	3.03e-05	response to abiotic stimulus	NRAS TGFB1 NOS3 PRKCA PPARG KRAS HRAS TP53 TGFBR1 EGFR
12502	3.05e-05	induction of programmed cell death	NRP1 TGFB1 SMAD3 TGFB3 MAPK1 PRKCA PPARG TP53 TGFBR1
42330	3.29e-05	taxis	MAP2K1 TGFB2 MAPK1 PRKCA PIK3CB FGF2 HRAS
6935	3.29e-05	chemotaxis	MAP2K1 TGFB2 MAPK1 PRKCA PIK3CB FGF2 HRAS
55123	3.34e-05	digestive system development	SMAD2 TGFB1 SMAD3 TGFB3 TGFBR1
9187	3.74e-05	cyclic nucleotide metabolic process	NPR1 NPR2 PDE5A ADCY2
60541	3.85e-05	respiratory system development	SMAD2 NOS3 TGFB3 KDR FGF2 TGFBR1
7346	3.94e-05	regulation of mitotic cell cycle	TGFB1 SMAD3 EGF TGFA HRAS TP53 EGFR
45786	4.23e-05	negative regulation of cell cycle	MAP2K1 TGFB2 TGFB1 SMAD3 HRAS TP53 EGFR
22408	4.38e-05	negative regulation of cell-cell adhesion	MAP2K1 TGFB1 ADIPOQ
48468	4.63e-05	cell development	TGFBR3 NRP1 MAP2K1 TGFB2 RIT1 SMAD3 LEP KDR PRKCA PPARG PTPN11 EGFR
48705	4.87e-05	skeletal system morphogenesis	SMAD2 TGFB1 SMAD3 TGFB3 TGFBR1 TGFBR2
3013	5.01e-05	circulatory system process	ACVRL1 NPR1 NOS3 NPR2 ADIPOQ PPARG PDE5A
8015	5.01e-05	blood circulation	ACVRL1 NPR1 NOS3 NPR2 ADIPOQ PPARG PDE5A
50795	5.07e-05	regulation of behavior	TGFB2 SMAD3 KDR CD36 SMAD7
45785	5.07e-05	positive regulation of cell adhesion	FIGF TGFB1 SMAD3 KDR PRKCA
90109	5.84e-05	regulation of cell-substrate junction assembly	SMAD4 TGFB2 SMAD3
7168	5.84e-05	receptor guanylyl cyclase signaling pathway	ACVRL1 SMAD3 KDR
71634	5.84e-05	regulation of transforming growth factor-beta production	GUCY2C NPR1 NPR2
51893	5.84e-05	regulation of focal adhesion assembly	ACVRL1 SMAD3 KDR
9611	5.98e-05	response to wounding	ACVRL1 NRP1 MAP2K1 TGFB2 TGFB1 SMAD3 TGFB3 PIK3CB CD36 FGF2 NFKB1
43434	6.06e-05	response to peptide hormone stimulus	SHC1 NOS3 LEP PRKCA PPARG BRAF GRB2
34330	6.12e-05	cell junction organization	TGFB2 TGFB1 SMAD3 TGFB3 SMAD7
51271	6.12e-05	negative regulation of cellular component movement	ACVRL1 TGFBR3 TGFB1 FGF2 SMAD7
30182	6.23e-05	neuron differentiation	NRP1 MAP2K1 SMAD4 TGFB2 RIT1 LEP PRKCA PTPN11 TGFBR1 EGFR
22602	6.51e-05	ovulation cycle process	TGFB2 NOS3 TGFB3 LEP KDR
7569	6.62e-05	cell aging	NRAS KRAS HRAS TP53
51726	6.68e-05	regulation of cell cycle	MAP2K1 TGFB2 TGFB1 SMAD3 EGF TGFA PTPN11 HRAS TP53 EGFR
6606	6.88e-05	protein import into nucleus	TGFB1 SHC1 TGFB3 HRAS TP53
6275	6.88e-05	regulation of DNA replication	TGFB2 TGFB1 MAPK1 FGF2 TP53
10629	6.9e-05	negative regulation of gene expression	NCOR2 SMAD2 SMAD4 NCOR1 TGFB1 SMAD3 PPARG FGF2 TP53 NFKB1 SMAD7
8152	7.35e-05	metabolic process	ACVRL1 GUCY2C NPR1 SHC1 NPR2 TGFA ADCY2 PIK3CB CBL FGF2 EGFR KDR MAPK1 CD36 SMAD2 MAP2K1 TGFB2 MAP2K2 TGFB1 SMAD3 NOS3 EGF TGFB3 ADIPOQ PRKCA BRAF PTPN11 TGFBR1 NFKB1 TGFBR2 SMAD7 TGFBR3 RIT1 NCOR1 FABP4 PIK3CA LEP PPARG PDE5A GRB2 TP53
46068	7.49e-05	cGMP metabolic process	NPR1 NPR2 PDE5A
51704	7.5e-05	multi-organism process	TGFB1 SMAD3 NOS3 TGFB3 ADCY7 TGFBR1 KDR MAPK1 PDE5A KRAS GRB2 HRAS TP53
7626	7.92e-05	locomotory behavior	MAP2K1 TGFB2 MAPK1 PRKCA PIK3CB FGF2 HRAS ADCY5
51170	8.23e-05	nuclear import	TGFB2 TGFB1 MAPK1 FGF2 TP53
51832	8.49e-05	avoidance of defenses of other organism involved in symbiotic interaction	MAPK1 FGF2
51834	8.49e-05	evasion or tolerance of defenses of other organism involved in symbiotic interaction	TGFB1 SMAD3
44415	8.49e-05	evasion or tolerance of host defenses	TGFB1 SMAD3
60363	8.49e-05	cranial suture morphogenesis	TGFB1 SMAD3
60364	8.49e-05	frontal suture morphogenesis	TGFB1 TGFB3
44413	8.49e-05	avoidance of host defenses	TGFB1 TGFB3
43932	8.49e-05	ossification involved in bone remodeling	TGFB1 TGFB3
189	8.49e-05	nuclear translocation of MAPK	TGFB1 SMAD3
19049	8.49e-05	evasion of host defenses by virus	TGFB1 SMAD3
51240	8.76e-05	positive regulation of multicellular organismal process	TGFB2 TGFB1 SMAD3 NOS3 TGFB3 PDE5A FGF2 EGFR
51098	8.76e-05	regulation of binding	SMAD2 SMAD4 TGFB1 SMAD3 PPARG KRAS SMAD7
22612	9.03e-05	gland morphogenesis	NRP1 TGFB2 TGFB1 TGFB3 EGFR
32368	9.69e-05	regulation of lipid transport	LEP ADIPOQ PPARG NFKB1
43193	0.000103	positive regulation of gene-specific transcription	SMAD2 TGFB1 SMAD3 TGFB3 PPARG TP53
122	0.000106	negative regulation of transcription from RNA polymerase II promoter	NCOR2 NCOR1 TGFB1 SMAD3 PPARG TP53 NFKB1 SMAD7
1933	0.000106	negative regulation of protein amino acid phosphorylation	TGFB1 SMAD3 PRKCA SMAD7
48706	0.000107	embryonic skeletal system development	SMAD2 SMAD3 TGFB3 TGFBR1 TGFBR2
43410	0.000113	positive regulation of MAPKKK cascade	TGFB2 LEP BRAF FGF2 HRAS
9190	0.000116	cyclic nucleotide biosynthetic process	NPR1 NPR2 ADCY2
10556	0.000126	regulation of macromolecule biosynthetic process	ACVRL1 SHC1 FGF2 MAPK1 HRAS SMAD2 NCOA2 MAP2K1 SMAD4 TGFB2 TGFB1 SMAD3 NOS3 TGFB3 ADIPOQ PRKCA TGFBR1 NFKB1 SMAD7 NCOR2 RIT1 NCOR1 PPARG KRAS CRK TP53
10594	0.000128	regulation of endothelial cell migration	ACVRL1 TGFB1 KDR FGF2
30278	0.000133	regulation of ossification	NRP1 TGFB2 TGFB1 SMAD3 TGFB3
45944	0.000134	positive regulation of transcription from RNA polymerase II promoter	SMAD2 SMAD4 RIT1 TGFB1 SMAD3 TGFB3 PPARG FGF2 TP53
3007	0.00014	heart morphogenesis	MAP2K1 MAPK1 PPARG GRB2 EGFR
1890	0.00014	placenta development	NCOR2 TGFBR3 TGFB2 SMAD3 SMAD7
1954	0.000142	positive regulation of cell-matrix adhesion	SMAD3 KDR CD36
50727	0.000164	regulation of inflammatory response	FABP4 ADIPOQ PRKCA PPARG PDE5A
10638	0.000172	positive regulation of organelle organization	TGFB1 SMAD3 EGF TGFA TP53
7176	0.000173	regulation of epidermal growth factor receptor activity	NCOR2 TGFB1 ADIPOQ
45599	0.000173	negative regulation of fat cell differentiation	SHC1 EGF TGFA
48511	0.000177	rhythmic process	TGFB2 NOS3 TGFB3 LEP KDR EGFR
51254	0.000178	positive regulation of RNA metabolic process	SMAD2 MAP2K1 SMAD4 RIT1 TGFB1 SMAD3 TGFB3 PPARG FGF2 TP53
6461	0.00018	protein complex assembly	SMAD2 MAP2K1 SMAD4 TGFB1 SMAD3 ADIPOQ BRAF GRB2 HRAS TP53
70271	0.00018	protein complex biogenesis	SMAD2 MAP2K1 SMAD4 TGFB1 SMAD3 ADIPOQ BRAF GRB2 HRAS TP53
51960	0.000186	regulation of nervous system development	NRP1 TGFB1 EGF PRKCA PPARG FGF2 TP53
32504	0.000187	multicellular organism reproduction	TGFB2 TGFB1 MAPK1 FGF2 TP53
48609	0.000187	reproductive process in a multicellular organism	TGFB2 TGFB1 NOS3 TGFB3 LEP KDR PTPN11 ADCY7 TGFBR1 EGFR
34504	0.000187	protein localization in nucleus	TGFB2 TGFB1 NOS3 TGFB3 LEP KDR PTPN11 ADCY7 TGFBR1 EGFR
902	0.000195	cell morphogenesis	TGFBR3 NRP1 MAP2K1 TGFB2 RIT1 PRKCA PTPN11 EGFR
10596	0.000203	negative regulation of endothelial cell migration	MAP2K1 HRAS TP53
61097	0.000203	regulation of protein tyrosine kinase activity	ACVRL1 TGFB1 FGF2
10149	0.000203	senescence	SHC1 EGF TGFA
7162	0.000207	negative regulation of cell adhesion	ACVRL1 MAP2K1 TGFB1 ADIPOQ
44087	0.000213	regulation of cellular component biogenesis	ACVRL1 SMAD3 TGFB3 KDR PRKCA TGFBR1
80134	0.000214	regulation of response to stress	TGFB2 NCOR1 FABP4 NOS3 ADIPOQ PRKCA PPARG PDE5A
60317	0.00023	cardiac epithelial to mesenchymal transition	TGFB1 ADIPOQ
50765	0.00023	negative regulation of phagocytosis	TGFB2 SMAD3
10692	0.00023	regulation of alkaline phosphatase activity	TGFBR3 TGFB2
60255	0.000239	regulation of macromolecule metabolic process	ACVRL1 SHC1 FGF2 EGFR MAPK1 HRAS SMAD2 NCOA2 MAP2K1 SMAD4 TGFB2 TGFB1 SMAD3 NOS3 EGF TGFB3 ADIPOQ PRKCA TGFBR1 NFKB1 SMAD7 NCOR2 RIT1 NCOR1 PPARG KRAS CRK TP53
48666	0.000247	neuron development	NRP1 MAP2K1 TGFB2 RIT1 LEP PRKCA PTPN11 EGFR
48878	0.000247	chemical homeostasis	NCOR2 TGFB1 FABP4 NPR1 ADIPOQ KDR PRKCA PPARG PTPN11 PIK3CB
33500	0.000257	carbohydrate homeostasis	NCOR2 ADIPOQ PPARG PTPN11
42593	0.000257	glucose homeostasis	NCOR2 ADIPOQ PPARG PTPN11
32228	0.000279	regulation of synaptic transmission, GABAergic	NRAS KRAS HRAS
46579	0.000279	positive regulation of Ras protein signal transduction	NRAS KRAS HRAS
48598	0.000301	embryonic morphogenesis	SMAD2 SMAD4 SMAD3 TGFB3 GRB2 TP53 TGFBR1 TGFBR2
42326	0.000319	negative regulation of phosphorylation	TGFB1 SMAD3 PRKCA SMAD7
18107	0.000324	peptidyl-threonine phosphorylation	PRKCA TGFBR1 TGFBR2
51057	0.000324	positive regulation of small GTPase mediated signal transduction	NRAS KRAS HRAS
48169	0.000324	regulation of long-term neuronal synaptic plasticity	NRAS KRAS HRAS
10721	0.000362	negative regulation of cell development	NCOR2 FABP4 ADIPOQ PPARG
3008	0.000362	system process	MAP2K1 MAPK1 GRB2 EGFR
1892	0.000362	embryonic placenta development	NRP1 TGFB1 TP53 SMAD7
45444	0.000362	fat cell differentiation	ACVRL1 TGFB1 NPR1 NOS3 NPR2 ADIPOQ ADCY3 PRKCA ADCY8 FGF2 ADCY5 NRAS MAPK1 PPARG PDE5A KRAS HRAS
42493	0.00037	response to drug	TGFB1 FABP4 NOS3 ADIPOQ PPARG TP53 TGFBR2
30501	0.00037	positive regulation of bone mineralization	TGFB1 SMAD3 TGFB3
10469	0.00037	regulation of receptor activity	SHC1 EGF TGFA
51291	0.000385	protein heterooligomerization	MAP2K1 BRAF GRB2 HRAS
32989	0.000404	cellular component morphogenesis	TGFBR3 NRP1 MAP2K1 TGFB2 RIT1 PRKCA PTPN11 EGFR
45936	0.000409	negative regulation of phosphate metabolic process	TGFB1 SMAD3 PRKCA SMAD7
10563	0.000409	negative regulation of phosphorus metabolic process	TGFB1 SMAD3 PRKCA SMAD7
45930	0.000423	negative regulation of mitotic cell cycle	TGFB1 SMAD3 EGFR
22601	0.000432	menstrual cycle phase	TGFB2 TGFB3
31065	0.000432	positive regulation of histone deacetylation	TGFB1 TP53
10799	0.000432	regulation of peptidyl-threonine phosphorylation	TGFB1 SMAD7
9123	0.000433	nucleoside monophosphate metabolic process	NPR1 NPR2 PDE5A ADCY2
70169	0.000477	positive regulation of biomineral formation	TGFB1 SMAD3 TGFB3
18210	0.000477	peptidyl-threonine modification	PRKCA TGFBR1 TGFBR2
51897	0.000477	positive regulation of protein kinase B signaling cascade	TGFB1 TGFBR1 EGFR
1503	0.000486	ossification	TGFB1 SMAD3 TGFB3 NPR2 EGFR
17038	0.000505	protein import	TGFB2 TGFB1 MAPK1 FGF2 TP53
7389	0.000508	pattern specification process	SMAD2 NRP1 SMAD4 SMAD3 TP53 TGFBR1 TGFBR2
42058	0.000535	regulation of epidermal growth factor receptor signaling pathway	NRAS KRAS HRAS
8542	0.000535	visual learning	SHC1 EGF TGFA
31575	0.000535	G1/S transition checkpoint	TGFB1 HRAS TP53
32570	0.000535	response to progesterone stimulus	TGFB2 TGFB1 TGFB3
51259	0.000537	protein oligomerization	MAP2K1 ADIPOQ BRAF GRB2 HRAS TP53
1775	0.000549	cell activation	RIT1 TGFB1 SMAD3 PIK3CB TP53 EGFR TGFBR2
51054	0.000578	positive regulation of DNA metabolic process	TGFB1 SHC1 TGFB3 HRAS
60627	0.00058	regulation of vesicle-mediated transport	TGFB1 ADIPOQ PRKCA CBL FGF2
10595	0.000599	positive regulation of endothelial cell migration	FABP4 ADIPOQ PPARG
50873	0.000599	brown fat cell differentiation	TGFB1 KDR FGF2
9636	0.000608	response to toxin	GUCY2C MAPK1 PRKCA TGFBR1
50708	0.000608	regulation of protein secretion	TGFB2 TGFB1 EGF TGFB3
34694	0.000672	response to prostaglandin stimulus	NRP1 MAP2K1 RIT1 PRKCA PTPN11 EGFR
51894	0.000672	positive regulation of focal adhesion assembly	ACVRL1 TGFB1 FGF2 SMAD7
31063	0.000672	regulation of histone deacetylation	TGFB1 TP53
34695	0.000672	response to prostaglandin E stimulus	NOS3 PPARG
10871	0.000672	negative regulation of receptor biosynthetic process	TGFBR3 TGFBR1
48812	0.000672	neuron projection morphogenesis	TGFBR3 TGFBR1
7406	0.000672	negative regulation of neuroblast proliferation	SMAD2 SMAD3
30336	0.000672	negative regulation of cell migration	TGFB1 TP53
90312	0.000672	positive regulation of protein amino acid deacetylation	ADIPOQ PPARG
55094	0.000672	response to lipoprotein stimulus	SMAD3 KDR
31053	0.000672	primary microRNA processing	TGFB1 TP53
2521	0.000703	leukocyte differentiation	RIT1 TGFB1 PPARG TP53 TGFBR2
1817	0.000718	regulation of cytokine production	SMAD4 TGFB2 TGFB1 SMAD3 ADIPOQ PPARG
7632	0.000728	visual behavior	SMAD2 SMAD3 MAPK1
43331	0.000728	response to dsRNA	PPARG CD36 NFKB1
10883	0.000728	regulation of lipid storage	NRAS KRAS HRAS
45893	0.000769	positive regulation of transcription, DNA-dependent	SMAD2 SMAD4 RIT1 TGFB1 SMAD3 TGFB3 PPARG FGF2 TP53
51052	0.000775	regulation of DNA metabolic process	TGFB1 SHC1 TGFB3 HRAS TP53
45787	0.000779	positive regulation of cell cycle	TGFB2 EGF TGFA EGFR
60348	0.000799	bone development	TGFB1 SMAD3 TGFB3 NPR2 EGFR
19216	0.000856	regulation of lipid metabolic process	TGFB1 LEP ADIPOQ PPARG NFKB1
40013	0.000861	negative regulation of locomotion	TGFB1 ADIPOQ PRKCA CBL
30100	0.000861	regulation of endocytosis	ACVRL1 TGFB1 FGF2 SMAD7
51047	0.000881	positive regulation of secretion	TGFB2 TGFB1 TGFB3 PRKCA PTPN11
30512	0.000886	negative regulation of transforming growth factor beta receptor signaling pathway	KRAS EGFR NFKB1
32768	0.000886	regulation of monooxygenase activity	TGFB3 TP53 SMAD7
51248	0.000907	negative regulation of protein metabolic process	SMAD4 TGFB1 SMAD3 PRKCA NFKB1 SMAD7
45741	0.000959	positive regulation of epidermal growth factor receptor activity	TGFB1 TP53
7184	0.000959	SMAD protein nuclear translocation	EGF TGFA
60039	0.000959	pericardium development	TGFBR3 TGFB2
90311	0.000959	regulation of protein amino acid deacetylation	TGFBR3 TGFB2
55017	0.000959	cardiac muscle tissue growth	TGFBR3 TGFB2
14855	0.000959	striated muscle cell proliferation	SMAD2 SMAD3
60038	0.000959	cardiac muscle cell proliferation	TGFB2 TGFB1
18105	0.000964	peptidyl-serine phosphorylation	PRKCA TGFBR1 TGFBR2
9314	0.000985	response to radiation	NRAS TGFB1 KRAS HRAS TP53 EGFR
