# Supplementary material for: Exploring the Pharmacological Mechanism of the Herb Pair “HuangLian-GanJiang” against Colorectal Cancer Based on Network Pharmacology
Source: Evid Based Complement Alternat Med. 2019 Nov 29;2019:2735050. doi: 10.1155/2019/2735050 (PMC6906823; doi:10.1155/2019/2735050)
Supplement: Supplementary Materials — Table S1: chemical compounds of HL-GJ from TCMSP. Table S2: chemical compounds of HL-GJ from TCMID. Table S3: compounds in HL-GJ and corresponding targets. Table S4: CRC targets. Table S5: topological parameters for PPI Network. Table S6: topological parameters for compound nodes. Table S7: Gene Ontology (BP) biological process analysis. Table S8: Gene Ontology (MF) molecular function analysis. Table S9: pathway analysis. [file 2735050.f1.zip › 2735050.f1/Table S8.xlsx]

## Sheet: Sheet1
Table S8 Gene Ontology (MF) Molecular Function analysis (p < 0.001)
GO-ID	CorrP-Val	Description	Genes
16849	5.97e-17	phosphorus-oxygen lyase activity	GUCY2C NPR1 NPR2 ADCY4 ADCY3 ADCY2 ADCY8 ADCY7 ADCY6 ADCY5
9975	5.97e-17	cyclase activity	GUCY2C NPR1 NPR2 ADCY4 ADCY3 ADCY2 ADCY8 ADCY7 ADCY6 ADCY5
5057	6.19e-17	receptor signaling protein activity	ACVRL1 SMAD2 MAP2K1 SMAD4 TGFB2 SMAD3 SHC1 EGF BRAF TGFBR1 EGFR TGFBR2 SMAD7 TGFBR3 KDR MAPK1
5160	3.88e-16	transforming growth factor beta receptor binding	TGFBR3 SMAD2 TGFB2 TGFB1 SMAD3 TGFB3 TGFBR1 TGFBR2 SMAD7
4016	4.42e-13	adenylate cyclase activity	ADCY4 ADCY3 ADCY2 ADCY8 ADCY7 ADCY6 ADCY5
5102	7.17e-13	receptor binding	SMAD2 NCOA2 FIGF TGFB2 TGFB1 SMAD3 SHC1 EGF TGFB3 ADIPOQ TGFA PTPN11 FGF2 TGFBR1 ADCY6 TGFBR2 SMAD7 NCOR2 TGFBR3 CDH5 LEP KDR PPARG GRB2
17076	9.95e-12	purine nucleotide binding	ACVRL1 GUCY2C NPR1 NPR2 ADCY4 ADCY3 ADCY2 PIK3CB ADCY8 ADCY7 EGFR ADCY6 ADCY5 RAP1B NRAS RAP1A KDR MAPK1 HRAS MAP2K1 MAP2K2 NOS3 PRKCA BRAF TGFBR1 TGFBR2 RIT1 PIK3CA PDE5A KRAS TP53
32553	1.68e-11	ribonucleotide binding	ACVRL1 GUCY2C NPR1 NPR2 ADCY4 ADCY3 ADCY2 PIK3CB ADCY8 ADCY7 EGFR ADCY6 ADCY5 RAP1B NRAS RAP1A KDR MAPK1 HRAS MAP2K1 MAP2K2 PRKCA BRAF TGFBR1 TGFBR2 RIT1 PIK3CA PDE5A KRAS TP53
32555	1.68e-11	purine ribonucleotide binding	ACVRL1 GUCY2C NPR1 NPR2 ADCY4 ADCY3 ADCY2 PIK3CB ADCY8 ADCY7 EGFR ADCY6 ADCY5 RAP1B NRAS RAP1A KDR MAPK1 HRAS MAP2K1 MAP2K2 PRKCA BRAF TGFBR1 TGFBR2 RIT1 PIK3CA PDE5A KRAS TP53
50431	1.68e-11	transforming growth factor beta binding	ACVRL1 TGFBR3 TGFB3 CD36 TGFBR1 TGFBR2
16773	1.38e-10	phosphotransferase activity, alcohol group as acceptor	ACVRL1 GUCY2C NRP1 MAP2K1 TGFB2 MAP2K2 NPR1 NPR2 TGFA PRKCA BRAF PIK3CB TGFBR1 EGFR TGFBR2 TGFBR3 PIK3CA KDR MAPK1
1883	1.91e-10	purine nucleoside binding	ACVRL1 GUCY2C NPR1 NPR2 ADCY4 ADCY3 ADCY2 PIK3CB ADCY8 ADCY7 EGFR ADCY6 ADCY5 RAP1B KDR MAPK1 MAP2K1 MAP2K2 NOS3 PRKCA BRAF TGFBR1 TGFBR2 PIK3CA PDE5A KRAS TP53
46332	1.94e-10	SMAD binding	ACVRL1 GUCY2C NPR1 NPR2 ADCY4 ADCY3 ADCY2 PIK3CB ADCY8 ADCY7 EGFR ADCY6 ADCY5 RAP1B KDR MAPK1 MAP2K1 MAP2K2 NOS3 PRKCA BRAF TGFBR1 TGFBR2 PIK3CA PDE5A KRAS TP53
1882	1.94e-10	nucleoside binding	ACVRL1 TGFBR3 SMAD2 SMAD4 SMAD3 TGFBR1 TGFBR2 SMAD7
5114	2.97e-10	type II transforming growth factor beta receptor binding	ACVRL1 GUCY2C NPR1 NPR2 ADCY4 ADCY3 ADCY2 PIK3CB ADCY8 ADCY7 EGFR ADCY6 ADCY5 RAP1B NRAS RAP1A KDR MAPK1 HRAS MAP2K1 MAP2K2 NOS3 PRKCA BRAF TGFBR1 TGFBR2 RIT1 PIK3CA PDE5A KRAS TP53
166	2.97e-10	nucleotide binding	TGFBR3 TGFB2 TGFB1 TGFB3 TGFBR1
16301	3.89e-10	kinase activity	ACVRL1 GUCY2C NRP1 MAP2K1 TGFB2 MAP2K2 NPR1 NPR2 TGFA PRKCA BRAF PIK3CB TGFBR1 EGFR TGFBR2 TGFBR3 PIK3CA KDR MAPK1
4672	4.78e-10	protein kinase activity	ACVRL1 GUCY2C NRP1 MAP2K1 TGFB2 MAP2K2 NPR1 NPR2 TGFA PRKCA BRAF TGFBR1 EGFR TGFBR2 TGFBR3 KDR MAPK1
5515	9.26e-10	protein binding	ACVRL1 NRP1 PIK3CB FGF2 CDH5 KDR CD36 HRAS NCOA2 MAP2K1 MAP2K2 ADIPOQ PRKCA TGFBR1 TGFBR2 NCOR2 TGFBR3 NCOR1 PIK3CA PPARG CRK TP53 GUCY2C FIGF NPR1 SHC1 NPR2 ADCY4 ADCY3 TGFA ADCY2 CBL EGFR ADCY6 RAP1B NRAS RAP1A MAPK1 SMAD2 SMAD4 TGFB2 TGFB1 SMAD3 NOS3 EGF TGFB3 BRAF PTPN11 NFKB1 SMAD7 RIT1 FABP4 LEP KRAS GRB2
4702	9.26e-10	receptor signaling protein serine/threonine kinase activity	ACVRL1 TGFBR3 TGFB2 MAPK1 BRAF TGFBR1 EGFR TGFBR2
19899	2.23e-09	enzyme binding	SMAD2 NRP1 MAP2K1 SMAD3 NPR1 PRKCA BRAF PTPN11 TGFBR1 EGFR SMAD7 NCOR2 CDH5 NCOR1 RAP1A MAPK1 TP53
16829	4.63e-09	lyase activity	GUCY2C NPR1 NPR2 ADCY4 ADCY3 ADCY2 ADCY8 ADCY7 ADCY6 ADCY5
16772	5.14e-09	transferase activity, transferring phosphorus-containing groups	ACVRL1 GUCY2C NRP1 MAP2K1 TGFB2 MAP2K2 NPR1 NPR2 TGFA PRKCA BRAF PIK3CB TGFBR1 EGFR TGFBR2 TGFBR3 PIK3CA KDR MAPK1
8294	1.3e-08	calcium- and calmodulin-responsive adenylate cyclase activity	ADCY3 ADCY2 ADCY8 ADCY6
30554	1.61e-08	adenyl nucleotide binding	ACVRL1 GUCY2C MAP2K1 MAP2K2 NPR1 NOS3 NPR2 ADCY4 ADCY3 PRKCA ADCY2 BRAF PIK3CB ADCY8 ADCY7 TGFBR1 EGFR ADCY6 TGFBR2 ADCY5 PIK3CA KDR MAPK1 TP53
5524	2.43e-08	ATP binding	ACVRL1 GUCY2C MAP2K1 MAP2K2 NPR1 NPR2 ADCY4 ADCY3 PRKCA ADCY2 BRAF PIK3CB ADCY8 ADCY7 TGFBR1 EGFR ADCY6 TGFBR2 ADCY5 PIK3CA KDR MAPK1 TP53
5126	2.55e-08	cytokine receptor binding	TGFBR3 SMAD2 FIGF TGFB2 TGFB1 SMAD3 TGFB3 TGFBR1 TGFBR2 SMAD7
32559	3.05e-08	adenyl ribonucleotide binding	ACVRL1 GUCY2C MAP2K1 MAP2K2 NPR1 NPR2 ADCY4 ADCY3 PRKCA ADCY2 BRAF PIK3CB ADCY8 ADCY7 TGFBR1 EGFR ADCY6 TGFBR2 ADCY5 PIK3CA KDR MAPK1 TP53
60089	4.33e-08	molecular transducer activity	ACVRL1 GUCY2C NRP1 NPR1 SHC1 NPR2 TGFA CBL EGFR KDR MAPK1 CD36 SMAD2 NCOA2 MAP2K1 SMAD4 TGFB2 SMAD3 EGF BRAF TGFBR1 TGFBR2 SMAD7 TGFBR3 PPARG GRB2 CRK
4871	4.33e-08	signal transducer activity	ACVRL1 GUCY2C NRP1 NPR1 SHC1 NPR2 TGFA CBL EGFR KDR MAPK1 CD36 SMAD2 NCOA2 MAP2K1 SMAD4 TGFB2 SMAD3 EGF BRAF TGFBR1 TGFBR2 SMAD7 TGFBR3 PPARG GRB2 CRK
19838	6.83e-08	growth factor binding	SMAD2 TGFB3 TGFBR2 SMAD7
34713	6.83e-08	type I transforming growth factor beta receptor binding	ACVRL1 TGFBR3 NRP1 TGFB3 KDR CD36 TGFBR1 TGFBR2
10843	1.1e-07	promoter binding	SMAD2 SMAD4 NCOR1 SMAD3 PPARG TP53 NFKB1 SMAD7
44212	1.41e-07	DNA regulatory region binding	SMAD2 SMAD4 NCOR1 SMAD3 PPARG TP53 NFKB1 SMAD7
19199	2.06e-07	transmembrane receptor protein kinase activity	ACVRL1 TGFBR3 NRP1 KDR TGFBR1 EGFR TGFBR2
70411	3.49e-07	I-SMAD binding	SMAD2 SMAD4 TGFBR1 SMAD7
5072	3.49e-07	transforming growth factor beta receptor, cytoplasmic mediator activity	SMAD2 SMAD4 SMAD3 SMAD7
5071	5.33e-07	transmembrane receptor protein serine/threonine kinase signaling protein activity	SMAD2 SMAD4 SMAD3 SMAD7
43560	7.77e-07	insulin receptor substrate binding	PIK3CA PTPN11 GRB2 PIK3CB
5154	1.09e-06	epidermal growth factor receptor binding	SHC1 EGF TGFA GRB2
8083	1.28e-06	growth factor activity	FIGF TGFB2 TGFB1 EGF TGFB3 LEP TGFA FGF2
5024	1.45e-06	transforming growth factor beta receptor activity	ACVRL1 TGFBR3 TGFBR1 TGFBR2
4675	1.93e-06	transmembrane receptor protein serine/threonine kinase activity	ACVRL1 TGFBR3 TGFBR1 TGFBR2
4674	3.44e-06	protein serine/threonine kinase activity	ACVRL1 TGFBR3 MAP2K1 TGFB2 MAP2K2 MAPK1 PRKCA BRAF TGFBR1 EGFR TGFBR2
70851	5.02e-06	growth factor receptor binding	FIGF SHC1 EGF TGFA GRB2 FGF2
5488	1.04e-05	binding	ACVRL1 NRP1 PIK3CB FGF2 CDH5 KDR CD36 HRAS NCOA2 MAP2K1 MAP2K2 ADIPOQ PRKCA VA TGFBR1 TGFBR2 NCOR2 TGFBR3 NCOR1 PIK3CA PPARG PDE5A CRK TP53 GUCY2C FIGF NPR1 SHC1 NPR2 ADCY4 ADCY3 TGFA ADCY2 ADCY8 CBL ADCY7 EGFR ADCY6 ADCY5 RAP1B NRAS RAP1A MAPK1 SMAD2 SMAD4 TGFB2 TGFB1 SMAD3 NOS3 EGF TGFB3 BRAF PTPN11 NFKB1 SMAD7 RIT1 FABP4 LEP KRAS GRB2
32561	1.3e-05	guanyl ribonucleotide binding	GUCY2C RAP1B NRAS RIT1 RAP1A NPR1 NPR2 PDE5A KRAS HRAS
19001	1.3e-05	guanyl nucleotide binding	GUCY2C RAP1B NRAS RIT1 RAP1A NPR1 NPR2 PDE5A KRAS HRAS
4383	1.91e-05	guanylate cyclase activity	GUCY2C NPR1 NPR2
19955	2.16e-05	cytokine binding	ACVRL1 TGFBR3 TGFB3 CD36 TGFBR1 TGFBR2
3824	2.88e-05	catalytic activity	ACVRL1 GUCY2C NRP1 NPR1 NPR2 ADCY4 ADCY3 TGFA ADCY2 PIK3CB ADCY8 CBL ADCY7 EGFR ADCY6 ADCY5 RAP1B NRAS RAP1A KDR MAPK1 HRAS MAP2K1 TGFB2 MAP2K2 NOS3 PRKCA BRAF PTPN11 VA TGFBR1 TGFBR2 TGFBR3 RIT1 PIK3CA PDE5A KRAS
19901	2.9e-05	protein kinase binding	NRP1 MAP2K1 SMAD3 NPR1 MAPK1 BRAF TP53
31625	3.71e-05	ubiquitin protein ligase binding	SMAD2 SMAD3 TP53 TGFBR1 SMAD7
16740	4.37e-05	transferase activity	ACVRL1 GUCY2C NRP1 MAP2K1 TGFB2 MAP2K2 NPR1 NPR2 TGFA PRKCA BRAF PIK3CB TGFBR1 EGFR TGFBR2 TGFBR3 PIK3CA KDR MAPK1
70412	4.98e-05	R-SMAD binding	SMAD2 SMAD4 SMAD3
46983	6.46e-05	protein dimerization activity	FIGF SMAD4 TGFB2 TGFB1 SMAD3 TGFB3 ADIPOQ BRAF TP53 TGFBR1 EGFR
5525	6.76e-05	GTP binding	GUCY2C RAP1B NRAS RIT1 RAP1A NPR1 NPR2 KRAS HRAS
19900	7.8e-05	kinase binding	NRP1 MAP2K1 SMAD3 NPR1 MAPK1 BRAF TP53
46982	9.8e-05	protein heterodimerization activity	TGFB2 TGFB1 TGFB3 BRAF TP53 TGFBR1 EGFR
4708	0.000122	MAP kinase kinase activity	MAP2K1 MAP2K2 TGFA
45309	0.000122	protein phosphorylated amino acid binding	MAPK1 GRB2 CRK
4712	0.000176	protein serine/threonine/tyrosine kinase activity	ACVRL1 SHC1 KDR ADCY2 PTPN11 TGFBR1 SMAD7
32403	0.000176	protein complex binding	MAP2K1 MAP2K2 TGFA
16941	0.000211	natriuretic peptide receptor activity	NPR1 NPR2
31435	0.000659	mitogen-activated protein kinase kinase kinase binding	MAP2K1 MAPK1
5025	0.000659	transforming growth factor beta receptor activity, type I	PIK3CA PIK3CB
30618	0.000659	transforming growth factor beta receptor, pathway-specific cytoplasmic mediator activity	SMAD2 SMAD3
46934	0.000659	phosphatidylinositol-4,5-bisphosphate 3-kinase activity	ACVRL1 TGFBR1
3924	0.000687	GTPase activity	RAP1B NRAS RIT1 RAP1A KRAS HRAS
4713	0.000877	protein tyrosine kinase activity	NRP1 MAP2K1 MAP2K2 KDR EGFR
