# Supplementary material for: Exploring the Pharmacological Mechanism of the Herb Pair “HuangLian-GanJiang” against Colorectal Cancer Based on Network Pharmacology
Source: Evid Based Complement Alternat Med. 2019 Nov 29;2019:2735050. doi: 10.1155/2019/2735050 (PMC6906823; doi:10.1155/2019/2735050)
Supplement: Supplementary Materials — Table S1: chemical compounds of HL-GJ from TCMSP. Table S2: chemical compounds of HL-GJ from TCMID. Table S3: compounds in HL-GJ and corresponding targets. Table S4: CRC targets. Table S5: topological parameters for PPI Network. Table S6: topological parameters for compound nodes. Table S7: Gene Ontology (BP) biological process analysis. Table S8: Gene Ontology (MF) molecular function analysis. Table S9: pathway analysis. [file 2735050.f1.zip › 2735050.f1/Table S9.xlsx]

## Sheet: Sheet1
Table S9 Pathway analysis (p <0.001)
ReactomePathway	P-value	FDR	HitGenes
DAP12 signaling	1.1102e-16	7.2164e-15	PIK3CB,FGF2,HRAS,MAP2K1,MAP2K2,PRKCA,PIK3CA,TP53,SHC1,ADCY4,ADCY3,ADCY2,ADCY8,ADCY7,EGFR,ADCY6,ADCY5,NRAS,MAPK1,EGF,BRAF,PTPN11,KRAS,GRB2
Signaling by PDGF	1.1102e-16	7.2164e-15	PIK3CB,FGF2,HRAS,MAP2K1,MAP2K2,PRKCA,PIK3CA,CRK,TP53,SHC1,ADCY4,ADCY3,ADCY2,ADCY8,ADCY7,EGFR,ADCY6,ADCY5,NRAS,MAPK1,EGF,BRAF,PTPN11,KRAS,GRB2
Signaling by EGFR	1.1102e-16	7.2164e-15	PIK3CB,FGF2,HRAS,MAP2K1,MAP2K2,PRKCA,PIK3CA,TP53,SHC1,ADCY4,ADCY3,ADCY2,ADCY8,CBL,ADCY7,EGFR,ADCY6,ADCY5,NRAS,MAPK1,EGF,BRAF,PTPN11,KRAS,GRB2
NGF signalling via TRKA from the plasma membrane	1.1102e-16	7.2164e-15	PIK3CB,FGF2,HRAS,MAP2K1,MAP2K2,PRKCA,PIK3CA,CRK,TP53,SHC1,ADCY4,ADCY3,ADCY2,ADCY8,ADCY7,EGFR,ADCY6,ADCY5,NRAS,RAP1A,MAPK1,EGF,BRAF,PTPN11,RIT1,KRAS,GRB2
Signalling by NGF	1.1102e-16	7.2164e-15	PIK3CB,FGF2,HRAS,MAP2K1,MAP2K2,PRKCA,PIK3CA,CRK,TP53,SHC1,ADCY4,ADCY3,ADCY2,ADCY8,ADCY7,EGFR,ADCY6,ADCY5,NRAS,RAP1A,MAPK1,EGF,BRAF,PTPN11,NFKB1,RIT1,KRAS,GRB2
Downstream signal transduction	1.1102e-16	7.2164e-15	PIK3CB,FGF2,HRAS,MAP2K1,MAP2K2,PRKCA,PIK3CA,CRK,TP53,SHC1,ADCY4,ADCY3,ADCY2,ADCY8,ADCY7,EGFR,ADCY6,ADCY5,NRAS,MAPK1,EGF,BRAF,PTPN11,KRAS,GRB2
DAP12 interactions	1.1102e-16	7.2164e-15	PIK3CB,FGF2,HRAS,MAP2K1,MAP2K2,PRKCA,PIK3CA,TP53,SHC1,ADCY4,ADCY3,ADCY2,ADCY8,ADCY7,EGFR,ADCY6,ADCY5,NRAS,MAPK1,EGF,BRAF,PTPN11,KRAS,GRB2
Signaling by VEGF	3.4417e-15	1.9618e-13	NRP1,PIK3CB,FGF2,CDH5,KDR,HRAS,MAP2K1,MAP2K2,PRKCA,PIK3CA,CRK,SHC1,EGFR,NRAS,MAPK1,NOS3,EGF,BRAF,KRAS,GRB2
Signaling by FGFR3	6.5503e-15	3.2752e-13	FGF2,HRAS,PIK3CA,SHC1,CBL,NRAS,MAPK1,BRAF,PTPN11,KRAS,GRB2
Signaling by FGFR4	8.5487e-15	3.8469e-13	FGF2,HRAS,PIK3CA,SHC1,CBL,NRAS,MAPK1,BRAF,PTPN11,KRAS,GRB2
VEGFA-VEGFR2 Pathway	3.0309e-14	1.2427e-12	PIK3CB,FGF2,CDH5,KDR,HRAS,MAP2K1,MAP2K2,PRKCA,PIK3CA,CRK,SHC1,EGFR,NRAS,MAPK1,NOS3,EGF,BRAF,KRAS,GRB2
Signaling by FGFR1	5.8398e-14	2.2032e-12	FGF2,HRAS,PIK3CA,SHC1,CBL,NRAS,MAPK1,BRAF,PTPN11,KRAS,GRB2
EGFR interacts with phospholipase C-gamma	6.295e-14	2.2032e-12	PRKCA,ADCY4,ADCY3,ADCY2,ADCY8,ADCY7,EGFR,ADCY6,ADCY5,EGF
Signaling by MET	1.1058e-13	3.5385e-12	HRAS,PIK3CA,CRK,SHC1,CBL,RAP1B,NRAS,RAP1A,PTPN11,KRAS,GRB2
Interleukin-3, 5 and GM-CSF signaling	1.3234e-13	3.9702e-12	PIK3CB,FGF2,HRAS,MAP2K1,MAP2K2,PIK3CA,CRK,SHC1,CBL,EGFR,NRAS,MAPK1,EGF,BRAF,PTPN11,KRAS,GRB2
Ca-dependent events	5.5933e-13	1.5661e-11	PRKCA,ADCY4,ADCY3,ADCY2,ADCY8,ADCY7,ADCY6,ADCY5,MAPK1
Signaling by SCF-KIT	7.917e-13	2.0584e-11	PIK3CB,FGF2,HRAS,MAP2K1,MAP2K2,PRKCA,PIK3CA,TP53,SHC1,CBL,EGFR,NRAS,MAPK1,EGF,BRAF,PTPN11,KRAS,GRB2
Tie2 Signaling	9.1138e-13	2.2785e-11	PIK3CB,HRAS,PIK3CA,SHC1,NRAS,PTPN11,KRAS,GRB2
Adenylate cyclase activating pathway	1.1158e-12	2.6779e-11	ADCY4,ADCY3,ADCY2,ADCY8,ADCY7,ADCY6,ADCY5
SHC1 events in ERBB2 signaling	1.397e-12	3.0734e-11	HRAS,PRKCA,SHC1,EGFR,NRAS,EGF,KRAS,GRB2
Signaling by Interleukins	2.0968e-12	4.1955e-11	PIK3CB,FGF2,CD36,HRAS,MAP2K1,MAP2K2,PIK3CA,CRK,TP53,SHC1,CBL,EGFR,NRAS,MAPK1,TGFB1,EGF,BRAF,PTPN11,NFKB1,KRAS,GRB2
RET signaling	2.0978e-12	4.1955e-11	PIK3CB,FGF2,HRAS,MAP2K1,MAP2K2,PRKCA,PIK3CA,SHC1,EGFR,NRAS,MAPK1,EGF,BRAF,PTPN11,KRAS,GRB2
Signaling by FGFR2	3.077e-12	5.8463e-11	FGF2,HRAS,PIK3CA,SHC1,CBL,NRAS,MAPK1,BRAF,PTPN11,KRAS,GRB2
Inhibition of adenylate cyclase pathway	1.151e-11	1.9443e-10	ADCY4,ADCY3,ADCY2,ADCY8,ADCY7,ADCY6,ADCY5
Adenylate cyclase inhibitory pathway	1.151e-11	1.9443e-10	ADCY4,ADCY3,ADCY2,ADCY8,ADCY7,ADCY6,ADCY5
Innate Immune System	1.1836e-11	1.9443e-10	PIK3CB,FGF2,CD36,HRAS,MAP2K1,MAP2K2,PRKCA,PIK3CA,CRK,TP53,SHC1,ADCY4,ADCY3,ADCY2,ADCY8,ADCY7,EGFR,ADCY6,ADCY5,RAP1B,NRAS,RAP1A,MAPK1,NOS3,EGF,BRAF,PTPN11,NFKB1,KRAS,GRB2
Downstream signaling of activated FGFR3	1.2152e-11	1.9443e-10	FGF2,HRAS,PIK3CA,SHC1,NRAS,PTPN11,KRAS,GRB2
CaM pathway	1.6541e-11	2.4811e-10	PRKCA,ADCY4,ADCY3,ADCY2,ADCY8,ADCY7,ADCY6,ADCY5
Calmodulin induced events	1.6541e-11	2.4811e-10	PRKCA,ADCY4,ADCY3,ADCY2,ADCY8,ADCY7,ADCY6,ADCY5
Transcriptional regulation of white adipocyte differentiation	1.8268e-11	2.7403e-10	CD36,NCOA1,NCOA2,ADIPOQ,NCOR2,NCOR1,PPARG,TGFB1,NFKB1,FABP4,LEP
Signaling by ERBB4	1.9949e-11	2.7928e-10	HRAS,NCOR1,PIK3CA,SHC1,EGFR,NRAS,EGF,KRAS,GRB2
Signaling by FGFR	2.0699e-11	2.8925e-10	FGF2,HRAS,PIK3CA,SHC1,CBL,NRAS,MAPK1,BRAF,PTPN11,KRAS,GRB2
Downstream signaling of activated FGFR4	2.225e-11	2.8925e-10	FGF2,HRAS,PIK3CA,SHC1,NRAS,PTPN11,KRAS,GRB2
Signaling by ERBB2	2.4522e-11	3.1879e-10	HRAS,PRKCA,PIK3CA,SHC1,EGFR,NRAS,EGF,KRAS,GRB2
Signalling to ERKs	2.6731e-11	3.475e-10	FGF2,HRAS,MAP2K1,MAP2K2,CRK,SHC1,EGFR,NRAS,RAP1A,MAPK1,EGF,BRAF,RIT1,KRAS,GRB2
PKA activation	2.8994e-11	3.4793e-10	ADCY4,ADCY3,ADCY2,ADCY8,ADCY7,ADCY6,ADCY5
PLC beta mediated events	2.9998e-11	3.5997e-10	PRKCA,ADCY4,ADCY3,ADCY2,ADCY8,ADCY7,ADCY6,ADCY5,MAPK1
Platelet activation, signaling and aggregation	3.647e-11	4.0178e-10	PIK3CB,CD36,PRKCA,PIK3CA,CRK,SHC1,RAP1B,RAP1A,MAPK1,TGFB2,TGFB1,EGF,TGFB3,PTPN11,GRB2
G-protein mediated events	3.6526e-11	4.0178e-10	PRKCA,ADCY4,ADCY3,ADCY2,ADCY8,ADCY7,ADCY6,ADCY5,MAPK1
MAP2K and MAPK activation	4.4082e-11	4.4082e-10	HRAS,MAP2K1,MAP2K2,NRAS,MAPK1,BRAF,KRAS
PKA-mediated phosphorylation of CREB	4.4082e-11	4.4082e-10	ADCY4,ADCY3,ADCY2,ADCY8,ADCY7,ADCY6,ADCY5
PKA activation in glucagon signalling	4.4082e-11	4.4082e-10	ADCY4,ADCY3,ADCY2,ADCY8,ADCY7,ADCY6,ADCY5
Downstream signaling of activated FGFR2	5.0858e-11	5.0858e-10	FGF2,HRAS,PIK3CA,SHC1,NRAS,PTPN11,KRAS,GRB2
Downstream signaling of activated FGFR1	6.5757e-11	6.5757e-10	FGF2,HRAS,PIK3CA,SHC1,NRAS,PTPN11,KRAS,GRB2
EGFR Transactivation by Gastrin	6.6107e-11	6.6107e-10	HRAS,PRKCA,EGFR,NRAS,KRAS,GRB2
TGF-beta receptor signaling activates SMADs	8.4315e-11	7.5883e-10	TGFBR1,TGFBR2,CBL,SMAD2,SMAD4,TGFB1,SMAD3,SMAD7
DAG and IP3 signaling	8.4315e-11	7.5883e-10	PRKCA,ADCY4,ADCY3,ADCY2,ADCY8,ADCY7,ADCY6,ADCY5
Signaling by TGF-beta Receptor Complex	1.0651e-10	9.586e-10	TGFBR1,TGFBR2,NCOR2,NCOR1,CBL,SMAD2,SMAD4,TGFB1,SMAD3,SMAD7
ARMS-mediated activation	1.3468e-10	1.1763e-09	FGF2,HRAS,MAP2K1,MAP2K2,CRK,SHC1,EGFR,NRAS,RAP1A,MAPK1,EGF,BRAF,KRAS,GRB2
PLC-gamma1 signalling	1.3547e-10	1.1763e-09	PRKCA,ADCY4,ADCY3,ADCY2,ADCY8,ADCY7,ADCY6,ADCY5
IRS-mediated signalling	1.4703e-10	1.1763e-09	PIK3CB,FGF2,HRAS,MAP2K1,MAP2K2,PIK3CA,SHC1,EGFR,NRAS,MAPK1,EGF,BRAF,PTPN11,KRAS,GRB2
Interleukin receptor SHC signaling	1.6241e-10	1.2993e-09	PIK3CB,FGF2,HRAS,MAP2K1,MAP2K2,PIK3CA,SHC1,EGFR,NRAS,MAPK1,EGF,BRAF,KRAS,GRB2
Prolonged ERK activation events	1.6241e-10	1.2993e-09	FGF2,HRAS,MAP2K1,MAP2K2,CRK,SHC1,EGFR,NRAS,RAP1A,MAPK1,EGF,BRAF,KRAS,GRB2
Signaling by Leptin	1.6241e-10	1.2993e-09	FGF2,HRAS,MAP2K1,MAP2K2,SHC1,EGFR,NRAS,MAPK1,EGF,BRAF,PTPN11,LEP,KRAS,GRB2
Insulin receptor signalling cascade	1.7323e-10	1.3511e-09	PIK3CB,FGF2,HRAS,MAP2K1,MAP2K2,PIK3CA,SHC1,EGFR,NRAS,MAPK1,EGF,BRAF,PTPN11,KRAS,GRB2
IRS-related events triggered by IGF1R	1.8287e-10	1.3511e-09	PIK3CB,FGF2,HRAS,MAP2K1,MAP2K2,PIK3CA,SHC1,EGFR,NRAS,MAPK1,EGF,BRAF,PTPN11,KRAS,GRB2
IGF1R signaling cascade	1.8287e-10	1.3511e-09	PIK3CB,FGF2,HRAS,MAP2K1,MAP2K2,PIK3CA,SHC1,EGFR,NRAS,MAPK1,EGF,BRAF,PTPN11,KRAS,GRB2
Signaling by Type 1 Insulin-like Growth Factor 1 Receptor (IGF1R)	1.9301e-10	1.3511e-09	PIK3CB,FGF2,HRAS,MAP2K1,MAP2K2,PIK3CA,SHC1,EGFR,NRAS,MAPK1,EGF,BRAF,PTPN11,KRAS,GRB2
Interleukin-2 signaling	2.3415e-10	1.6391e-09	PIK3CB,FGF2,HRAS,MAP2K1,MAP2K2,PIK3CA,SHC1,EGFR,NRAS,MAPK1,EGF,BRAF,KRAS,GRB2
VEGFR2 mediated cell proliferation	2.3415e-10	1.6391e-09	FGF2,KDR,HRAS,MAP2K1,MAP2K2,PRKCA,SHC1,EGFR,NRAS,MAPK1,EGF,BRAF,KRAS,GRB2
G alpha (z) signalling events	3.5407e-10	2.4785e-09	ADCY4,ADCY3,ADCY2,ADCY8,ADCY7,ADCY6,ADCY5
Downstream signaling events of B Cell Receptor (BCR)	3.7309e-10	2.6117e-09	PIK3CB,FGF2,HRAS,PIK3CA,TP53,EGFR,NRAS,MAPK1,EGF,PTPN11,NFKB1,KRAS,GRB2
Signaling by the B Cell Receptor (BCR)	4.2205e-10	2.9543e-09	PIK3CB,FGF2,HRAS,PIK3CA,TP53,SHC1,CBL,EGFR,NRAS,MAPK1,EGF,PTPN11,NFKB1,KRAS,GRB2
Opioid Signalling	5.965e-10	3.7672e-09	PRKCA,ADCY4,ADCY3,ADCY2,ADCY8,ADCY7,ADCY6,ADCY5,MAPK1
Signaling by Insulin receptor	5.9825e-10	3.7672e-09	PIK3CB,FGF2,HRAS,MAP2K1,MAP2K2,PIK3CA,SHC1,EGFR,NRAS,MAPK1,EGF,BRAF,PTPN11,KRAS,GRB2
Negative regulation of MAPK pathway	6.2787e-10	3.7672e-09	HRAS,MAP2K1,MAP2K2,NRAS,MAPK1,BRAF,KRAS
Vasopressin regulates renal water homeostasis via Aquaporins	8.2177e-10	4.9306e-09	ADCY4,ADCY3,ADCY2,ADCY8,ADCY7,ADCY6,ADCY5
GRB2 events in ERBB2 signaling	9.1161e-10	5.4697e-09	HRAS,EGFR,NRAS,EGF,KRAS,GRB2
Integration of energy metabolism	9.7309e-10	5.8385e-09	ADIPOQ,PRKCA,ADCY4,ADCY3,ADCY2,ADCY8,ADCY7,ADCY6,ADCY5,RAP1A
Signalling to p38 via RIT and RIN	1.557e-09	9.3422e-09	FGF2,HRAS,MAP2K1,MAP2K2,SHC1,EGFR,NRAS,MAPK1,EGF,BRAF,RIT1,KRAS,GRB2
Fc epsilon receptor (FCERI) signaling	1.6131e-09	9.6789e-09	PIK3CB,FGF2,HRAS,MAP2K1,MAP2K2,PIK3CA,TP53,SHC1,EGFR,NRAS,MAPK1,EGF,BRAF,PTPN11,NFKB1,KRAS,GRB2
MAPK1/MAPK3 signaling	1.6502e-09	9.9012e-09	FGF2,HRAS,MAP2K1,MAP2K2,SHC1,EGFR,NRAS,MAPK1,EGF,BRAF,PTPN11,KRAS,GRB2
Frs2-mediated activation	1.7484e-09	1.049e-08	FGF2,HRAS,MAP2K1,MAP2K2,SHC1,EGFR,NRAS,RAP1A,MAPK1,EGF,BRAF,KRAS,GRB2
Cytokine Signaling in Immune system	1.8037e-09	1.0822e-08	PIK3CB,FGF2,CD36,HRAS,MAP2K1,MAP2K2,PIK3CA,CRK,TP53,SHC1,CBL,EGFR,NRAS,MAPK1,TGFB1,EGF,BRAF,PTPN11,NFKB1,KRAS,GRB2
Aquaporin-mediated transport	2.1896e-09	1.2208e-08	ADCY4,ADCY3,ADCY2,ADCY8,ADCY7,ADCY6,ADCY5
Neurotransmitter Receptor Binding And Downstream Transmission In The Postsynaptic Cell	2.3905e-09	1.2208e-08	HRAS,PRKCA,ADCY4,ADCY3,ADCY2,ADCY8,ADCY7,ADCY6,ADCY5,MAPK1,BRAF
Axon guidance	2.4416e-09	1.2208e-08	NRP1,PIK3CB,FGF2,KDR,HRAS,MAP2K1,MAP2K2,PRKCA,PIK3CA,SHC1,EGFR,NRAS,MAPK1,EGF,BRAF,PTPN11,KRAS,GRB2
SHC-mediated cascade:FGFR3	4.0297e-09	2.0149e-08	FGF2,HRAS,SHC1,NRAS,KRAS,GRB2
Glucagon signaling in metabolic regulation	4.1982e-09	2.0991e-08	ADCY4,ADCY3,ADCY2,ADCY8,ADCY7,ADCY6,ADCY5
SHC-related events triggered by IGF1R	6.8493e-09	3.4246e-08	HRAS,SHC1,NRAS,KRAS,GRB2
FRS-mediated FGFR3 signaling	7.501e-09	3.7505e-08	FGF2,HRAS,NRAS,PTPN11,KRAS,GRB2
SHC-mediated cascade:FGFR4	7.501e-09	3.7505e-08	FGF2,HRAS,SHC1,NRAS,KRAS,GRB2
SHC-mediated cascade:FGFR1	9.9979e-09	4.9989e-08	FGF2,HRAS,SHC1,NRAS,KRAS,GRB2
MAPK family signaling cascades	1.2854e-08	6.427e-08	FGF2,HRAS,MAP2K1,MAP2K2,SHC1,EGFR,NRAS,MAPK1,EGF,BRAF,PTPN11,KRAS,GRB2
Activation of GABAB receptors	1.3086e-08	6.5428e-08	ADCY4,ADCY3,ADCY2,ADCY8,ADCY7,ADCY6,ADCY5
GABA B receptor activation	1.3086e-08	6.5428e-08	ADCY4,ADCY3,ADCY2,ADCY8,ADCY7,ADCY6,ADCY5
FRS-mediated FGFR4 signaling	1.3146e-08	6.5728e-08	FGF2,HRAS,NRAS,PTPN11,KRAS,GRB2
SOS-mediated signalling	1.405e-08	6.8284e-08	FGF2,HRAS,MAP2K1,MAP2K2,SHC1,EGFR,NRAS,MAPK1,EGF,BRAF,KRAS,GRB2
GRB2 events in EGFR signaling	1.405e-08	6.8284e-08	FGF2,HRAS,MAP2K1,MAP2K2,SHC1,EGFR,NRAS,MAPK1,EGF,BRAF,KRAS,GRB2
SHC1 events in EGFR signaling	1.405e-08	6.8284e-08	FGF2,HRAS,MAP2K1,MAP2K2,SHC1,EGFR,NRAS,MAPK1,EGF,BRAF,KRAS,GRB2
RAF/MAP kinase cascade	1.405e-08	6.8284e-08	FGF2,HRAS,MAP2K1,MAP2K2,SHC1,EGFR,NRAS,MAPK1,EGF,BRAF,KRAS,GRB2
SHC-mediated cascade:FGFR2	1.7071e-08	6.8284e-08	FGF2,HRAS,SHC1,NRAS,KRAS,GRB2
FRS-mediated FGFR1 signaling	1.7071e-08	6.8284e-08	FGF2,HRAS,NRAS,PTPN11,KRAS,GRB2
MET activates RAS signaling	1.8482e-08	7.3926e-08	HRAS,SHC1,NRAS,KRAS,GRB2
Signalling to RAS	2.6461e-08	1.0584e-07	FGF2,HRAS,MAP2K1,MAP2K2,SHC1,EGFR,NRAS,MAPK1,EGF,BRAF,KRAS,GRB2
FRS-mediated FGFR2 signaling	2.785e-08	1.114e-07	FGF2,HRAS,NRAS,PTPN11,KRAS,GRB2
SHC1 events in ERBB4 signaling	2.8402e-08	1.1361e-07	HRAS,SHC1,NRAS,KRAS,GRB2
Regulation of signaling by CBL	2.8402e-08	1.1361e-07	PIK3CB,PIK3CA,CRK,CBL,GRB2
Downregulation of TGF-beta receptor signaling	3.505e-08	1.402e-07	TGFBR1,TGFBR2,SMAD2,TGFB1,SMAD3,SMAD7
Transmission across Chemical Synapses	6.0065e-08	2.4026e-07	HRAS,PRKCA,ADCY4,ADCY3,ADCY2,ADCY8,ADCY7,ADCY6,ADCY5,MAPK1,BRAF
PI5P, PP2A and IER3 Regulate PI3K/AKT Signaling	6.0852e-08	2.4341e-07	PIK3CB,FGF2,PIK3CA,EGFR,MAPK1,EGF,PTPN11,GRB2
NCAM signaling for neurite out-growth	6.3747e-08	2.5499e-07	FGF2,HRAS,MAP2K1,MAP2K2,SHC1,EGFR,NRAS,MAPK1,EGF,BRAF,KRAS,GRB2
Negative regulation of FGFR3 signaling	6.6402e-08	2.6561e-07	FGF2,CBL,MAPK1,BRAF,PTPN11,GRB2
PIP3 activates AKT signaling	8.6623e-08	3.4649e-07	PIK3CB,FGF2,PIK3CA,TP53,EGFR,MAPK1,EGF,PTPN11,GRB2
Negative regulation of FGFR4 signaling	9.8009e-08	3.9203e-07	FGF2,CBL,MAPK1,BRAF,PTPN11,GRB2
Negative regulation of the PI3K/AKT network	9.9257e-08	3.9703e-07	PIK3CB,FGF2,PIK3CA,EGFR,MAPK1,EGF,PTPN11,GRB2
GABA receptor activation	1.0383e-07	4.153e-07	ADCY4,ADCY3,ADCY2,ADCY8,ADCY7,ADCY6,ADCY5
PI3K/AKT activation	1.0836e-07	4.3343e-07	PIK3CB,FGF2,PIK3CA,TP53,EGFR,MAPK1,EGF,PTPN11,GRB2
Negative feedback regulation of MAPK pathway	1.165e-07	4.66e-07	MAP2K1,MAP2K2,MAPK1,BRAF
GAB1 signalosome	1.1659e-07	4.6636e-07	PIK3CB,FGF2,PIK3CA,TP53,EGFR,MAPK1,EGF,PTPN11,GRB2
Spry regulation of FGF signaling	1.1715e-07	4.6859e-07	CBL,MAPK1,BRAF,PTPN11,GRB2
Negative regulation of FGFR1 signaling	1.4108e-07	5.6434e-07	FGF2,CBL,MAPK1,BRAF,PTPN11,GRB2
Negative regulation of FGFR2 signaling	1.6785e-07	6.714e-07	FGF2,CBL,MAPK1,BRAF,PTPN11,GRB2
Gastrin-CREB signalling pathway via PKC and MAPK	2.5763e-07	7.9793e-07	FGF2,HRAS,MAP2K1,MAP2K2,PRKCA,PIK3CA,SHC1,EGFR,NRAS,MAPK1,EGF,BRAF,KRAS,GRB2
Signaling by PTK6	2.6598e-07	7.9793e-07	HRAS,CRK,CBL,EGFR,NRAS,EGF,KRAS
Adaptive Immune System	3.5854e-07	1.0756e-06	PIK3CB,FGF2,CD36,HRAS,PIK3CA,TP53,SHC1,CBL,EGFR,RAP1B,NRAS,RAP1A,MAPK1,EGF,PTPN11,NFKB1,KRAS,GRB2
Signal transduction by L1	4.4421e-07	1.3326e-06	NRP1,MAP2K1,MAP2K2,EGFR,MAPK1
Downregulation of SMAD2/3:SMAD4 transcriptional activity	5.5755e-07	1.6726e-06	NCOR2,NCOR1,SMAD2,SMAD4,SMAD3
Transcriptional activity of SMAD2/SMAD3:SMAD4 heterotrimer	7.4691e-07	2.2407e-06	NCOR2,NCOR1,SMAD2,SMAD4,SMAD3,SMAD7
MET activates RAP1 and RAC1	8.8026e-07	2.6408e-06	CRK,RAP1B,RAP1A,GRB2
FCERI mediated MAPK activation	1.1722e-06	3.5166e-06	FGF2,HRAS,MAP2K1,MAP2K2,SHC1,EGFR,NRAS,MAPK1,EGF,BRAF,KRAS,GRB2
Role of LAT2/NTAL/LAB on calcium mobilization	1.2885e-06	3.8654e-06	PIK3CB,FGF2,PIK3CA,TP53,SHC1,EGFR,MAPK1,EGF,PTPN11,GRB2
Integrin alphaIIb beta3 signaling	1.5113e-06	4.5339e-06	CRK,SHC1,RAP1B,RAP1A,GRB2
RAF activation	1.8063e-06	5.4188e-06	HRAS,NRAS,BRAF,KRAS
Post NMDA receptor activation events	3.9916e-06	1.1975e-05	HRAS,ADCY3,ADCY8,MAPK1,BRAF
PI3K events in ERBB2 signaling	4.341e-06	1.3023e-05	PIK3CA,EGFR,EGF,GRB2
RAF-independent MAPK1/3 activation	5.5903e-06	1.6771e-05	MAP2K1,MAP2K2,MAPK1,PTPN11
Signaling by GPCR	6.6658e-06	1.9997e-05	PIK3CB,FGF2,HRAS,MAP2K1,MAP2K2,PRKCA,PIK3CA,SHC1,ADCY4,ADCY3,ADCY2,ADCY8,ADCY7,EGFR,ADCY6,ADCY5,NRAS,MAPK1,EGF,BRAF,KRAS,GRB2
Activation of RAS in B cells	6.7669e-06	2.0301e-05	HRAS,NRAS,KRAS
Activation of NMDA receptor upon glutamate binding and postsynaptic events	6.9228e-06	2.0768e-05	HRAS,ADCY3,ADCY8,MAPK1,BRAF
Platelet Aggregation (Plug Formation)	6.9228e-06	2.0768e-05	CRK,SHC1,RAP1B,RAP1A,GRB2
MET promotes cell motility	7.0872e-06	2.1262e-05	CRK,RAP1B,RAP1A,GRB2
PI-3K cascade:FGFR3	8.8612e-06	2.6584e-05	FGF2,PIK3CA,PTPN11,GRB2
PI-3K cascade:FGFR4	1.3365e-05	4.0096e-05	FGF2,PIK3CA,PTPN11,GRB2
Cell surface interactions at the vascular wall	1.4624e-05	4.3873e-05	PIK3CB,HRAS,PIK3CA,SHC1,NRAS,TGFB1,PTPN11,KRAS,GRB2
PI-3K cascade:FGFR1	1.6161e-05	4.8482e-05	FGF2,PIK3CA,PTPN11,GRB2
CD209 (DC-SIGN) signaling	1.6161e-05	4.8482e-05	HRAS,NRAS,NFKB1,KRAS
G alpha (s) signalling events	1.8746e-05	5.6237e-05	ADCY4,ADCY3,ADCY2,ADCY8,ADCY7,ADCY6,ADCY5
PI-3K cascade:FGFR2	2.3012e-05	6.9035e-05	FGF2,PIK3CA,PTPN11,GRB2
EGFR downregulation	2.3012e-05	6.9035e-05	CBL,EGFR,EGF,GRB2
GPVI-mediated activation cascade	2.6446e-05	7.9338e-05	PIK3CB,PIK3CA,SHC1,PTPN11,GRB2
PTK6 Regulates RHO GTPases, RAS GTPase and MAP kinases	2.714e-05	8.1419e-05	HRAS,CRK,NRAS,KRAS
MAPK1 (ERK2) activation	2.7304e-05	8.1913e-05	MAP2K2,MAPK1,PTPN11
G beta:gamma signalling through PI3Kgamma	5.6363e-05	0.00016909	PIK3CB,PIK3CA,SHC1,GRB2
SMAD2/SMAD3:SMAD4 heterotrimer regulates transcription	8.226e-05	0.00024678	SMAD2,SMAD4,SMAD3,SMAD7
G-protein beta:gamma signalling	8.226e-05	0.00024678	PIK3CB,PIK3CA,SHC1,GRB2
Response to elevated platelet cytosolic Ca2+	0.00010442	0.00031327	CD36,PRKCA,TGFB2,TGFB1,EGF,TGFB3
p38MAPK events	0.00011427	0.00034281	HRAS,NRAS,KRAS
Signaling by Activin	0.00011427	0.00034281	SMAD2,SMAD4,SMAD3
Generic Transcription Pathway	0.00014498	0.00036484	NCOA1,NCOA2,NCOR2,NCOR1,PPARG,TP53,TGFA,EGFR,SMAD2,SMAD4,SMAD3,SMAD7
p130Cas linkage to MAPK signaling for integrins	0.00017379	0.00036484	CRK,RAP1B,RAP1A
GRB2:SOS provides linkage to MAPK signaling for Integrins	0.00017379	0.00036484	RAP1B,RAP1A,GRB2
Deubiquitination	0.00018242	0.00036484	TGFBR1,TGFBR2,TP53,SMAD2,SMAD4,TGFB1,SMAD3,SMAD7
Regulation of lipid metabolism by Peroxisome proliferator-activated receptor alpha (PPARalpha)	0.00019486	0.00038973	CD36,NCOA1,NCOA2,NCOR2,NCOR1,PPARG
Regulation of KIT signaling	0.00020987	0.00041974	PRKCA,CBL,GRB2
TGF-beta receptor signaling in EMT (epithelial to mesenchymal transition)	0.00020987	0.00041974	TGFBR1,TGFBR2,TGFB1
PI3K Cascade	0.0002454	0.0004908	PIK3CB,FGF2,PIK3CA,PTPN11,GRB2
L1CAM interactions	0.00029097	0.00058194	NRP1,MAP2K1,MAP2K2,EGFR,MAPK1
Syndecan interactions	0.00029585	0.0005917	FGF2,PRKCA,TGFB1
Signaling by NODAL	0.00034622	0.00069243	SMAD2,SMAD4,SMAD3
Neurophilin interactions with VEGF and VEGFR	0.0003843	0.00076859	NRP1,KDR
PLCG1 events in ERBB2 signaling	0.0003843	0.00076859	EGFR,EGF
